# Supplementary material for: Genome-wide association analysis reveals potential genetic correlation and causality between circulating inflammatory proteins and amyotrophic lateral sclerosis
Source: Aging (Albany NY). 2024 May 30;16(11):9470–84. doi: 10.18632/aging.205878 (PMC11210256; doi:10.18632/aging.205878)
Supplement: Supplementary Table 1 [file aging-16-205878-s001.xls]

## Sheet: content
content	Supplementary table
Data Sources	S1
Genetic correlation genetic overlap and genetic causation results between circulating inflammatory proteins and ALS	S2
Shared sites between C-C motif chemokine 28 levels and ALS	S3
Shared sites between Interleukin-18 levels and ALS	S4
Shared sites between C-X-C motif chemokine 1 levels and ALS	S5
Shared sites between Leukemia inhibitory factor receptor levels and ALS	S6
Results of Forward Mendelian Randomization Analysis between 91 inflammatory proteins and ALS (snp p<5e-8)	S7
Exclude rs112665079 and reperform the Mendelian randomization analysis	S8
Results of Reverse Mendelian Randomization Analysis between 91 inflammatory proteins and ALS	S9

## Sheet: Supplementary Table 1
Supplementary Table 1. Data sources.
TRIT	PMID/Source	Year	Samplesize	Ancestry
91 circulating inflammatory proteins	37563310	2023	14824	EUR
Amyotrophic lateral sclerosis	34873335	2021	138086	EUR
91 details of circulating inflammatory proteins
First author	Study accession	Reported trait	Discovery sample number	Replication sample number
Zhao JH	GCST90274783	C-X-C motif chemokine 6 levels	• 14744 European	• 1585 European, NR
Zhao JH	GCST90274759	Adenosine Deaminase levels	• 14736 European	• 1585 European, NR
Zhao JH	GCST90274785	Delta and Notch-like epidermal growth factor-related receptor levels	• 14735 European	• 1585 European, NR
Zhao JH	GCST90274761	Axin-1 levels	• 11793 European	• 1585 European, NR
Zhao JH	GCST90274787	Fibroblast growth factor 19 levels	• 14744 European	• 1585 European, NR
Zhao JH	GCST90274788	Fibroblast growth factor 21 levels	• 14743 European	• 1585 European, NR
Zhao JH	GCST90274764	Eotaxin levels	• 14734 European	• 1585 European, NR
Zhao JH	GCST90274765	C-C motif chemokine 19 levels	• 14736 European	• 1585 European, NR
Zhao JH	GCST90274766	C-C motif chemokine 20 levels	• 14736 European	• 1585 European, NR
Zhao JH	GCST90274767	C-C motif chemokine 23 levels	• 14736 European	• 1585 European, NR
Zhao JH	GCST90274768	C-C motif chemokine 25 levels	• 14736 European	• 1585 European, NR
Zhao JH	GCST90274794	Interferon gamma levels	• 11793 European	• 1585 European, NR
Zhao JH	GCST90274795	Interleukin-10 levels	• 14744 European	• 1585 European, NR
Zhao JH	GCST90274771	Natural killer cell receptor 2B4 levels	• 14735 European	• 1585 European, NR
Zhao JH	GCST90274772	CD40L receptor levels	• 14736 European	• 1585 European, NR
Zhao JH	GCST90274773	T-cell surface glycoprotein CD5 levels	• 14735 European	• 1585 European, NR
Zhao JH	GCST90274774	T-cell surface glycoprotein CD6 isoform levels	• 14735 European	• 1585 European, NR
Zhao JH	GCST90274775	CUB domain-containing protein 1 levels	• 14734 European	• 1585 European, NR
Zhao JH	GCST90274801	Interleukin-17A levels	• 11784 European	• 1585 European, NR
Zhao JH	GCST90274777	Cystatin D levels	• 14736 European	• 1585 European, NR
Zhao JH	GCST90274778	Fractalkine levels	• 14743 European	• 1585 European, NR
Zhao JH	GCST90274804	interleukin-18 receptor 1 levels	• 14743 European	• 1585 European, NR
Zhao JH	GCST90274780	C-X-C motif chemokine 10 levels	• 14744 European	• 1585 European, NR
Zhao JH	GCST90274781	C-X-C motif chemokine 11 levels	• 14736 European	• 1585 European, NR
Zhao JH	GCST90274758	Eukaryotic translation initiation factor 4E-binding protein 1 levels	• 14736 European	• 1585 European, NR
Zhao JH	GCST90274784	C-X-C motif chemokine 9 levels	• 14735 European	• 1585 European, NR
Zhao JH	GCST90274760	Artemin levels	• 11778 European	• 1585 European, NR
Zhao JH	GCST90274786	Protein S100-A12 levels	• 14743 European	• 1585 European, NR
Zhao JH	GCST90274762	beta-nerve growth factor levels	• 14743 European	• 1585 European, NR
Zhao JH	GCST90274763	Caspase 8 levels	• 14744 European	• 1585 European, NR
Zhao JH	GCST90274789	Fibroblast growth factor 23 levels	• 14735 European	• 1585 European, NR
Zhao JH	GCST90274790	Fibroblast growth factor 5 levels	• 11789 European	• 1585 European, NR
Zhao JH	GCST90274791	Fms-related tyrosine kinase 3 ligand levels	• 14734 European	• 1585 European, NR
Zhao JH	GCST90274792	Glial cell line-derived neurotrophic factor levels	• 14736 European	• 1585 European, NR
Zhao JH	GCST90274793	Hepatocyte growth factor levels	• 14734 European	• 1585 European, NR
Zhao JH	GCST90274769	C-C motif chemokine 28 levels	• 14734 European	• 1585 European, NR
Zhao JH	GCST90274770	C-C motif chemokine 4 levels	• 14744 European	• 1585 European, NR
Zhao JH	GCST90274796	Interleukin-10 receptor subunit alpha levels	• 11793 European	• 1585 European, NR
Zhao JH	GCST90274797	Interleukin-10 receptor subunit beta levels	• 14734 European	• 1585 European, NR
Zhao JH	GCST90274798	Interleukin-12 subunit beta levels	• 14735 European	• 1585 European, NR
Zhao JH	GCST90274799	Interleukin-13 levels	• 11792 European	• 1585 European, NR
Zhao JH	GCST90274800	Interleukin-15 receptor subunit alpha levels	• 11792 European	• 1585 European, NR
Zhao JH	GCST90274776	Macrophage colony-stimulating factor 1 levels	• 14734 European	• 1585 European, NR
Zhao JH	GCST90274802	Interleukin-17C levels	• 11793 European	• 1585 European, NR
Zhao JH	GCST90274803	Interleukin-18 levels	• 14744 European	• 1585 European, NR
Zhao JH	GCST90274779	C-X-C motif chemokine 1 levels	• 14736 European	• 1585 European, NR
Zhao JH	GCST90274805	Interleukin-1-alpha levels	• 11788 European	• 1585 European, NR
Zhao JH	GCST90274806	Interleukin-2 levels	• 11789 European	• 1585 European, NR
Zhao JH	GCST90274807	Interleukin-20 levels	• 11784 European	• 1585 European, NR
Zhao JH	GCST90274782	C-X-C motif chemokine 5 levels	• 14736 European	• 1585 European, NR
Zhao JH	GCST90274808	Interleukin-20 receptor subunit alpha levels	• 11792 European	• 1585 European, NR
Zhao JH	GCST90274809	Interleukin-22 receptor subunit alpha-1 levels	• 11793 European	• 1585 European, NR
Zhao JH	GCST90274810	Interleukin-24 levels	• 11785 European	• 1585 European, NR
Zhao JH	GCST90274811	Interleukin-2 receptor subunit beta levels	• 11792 European	• 1585 European, NR
Zhao JH	GCST90274812	Interleukin-33 levels	• 11793 European	• 1585 European, NR
Zhao JH	GCST90274813	Interleukin-4 levels	• 11793 European	• 1585 European, NR
Zhao JH	GCST90274814	Interleukin-5 levels	• 11792 European	• 1585 European, NR
Zhao JH	GCST90274815	Interleukin-6 levels	• 14743 European	• 1585 European, NR
Zhao JH	GCST90274816	Interleukin-7 levels	• 14736 European	• 1585 European, NR
Zhao JH	GCST90274817	Interleukin-8 levels	• 14744 European	• 1585 European, NR
Zhao JH	GCST90274818	Latency-associated peptide transforming growth factor beta 1 levels	• 14736 European	• 1585 European, NR
Zhao JH	GCST90274819	Leukemia inhibitory factor levels	• 11793 European	• 1585 European, NR
Zhao JH	GCST90274820	Leukemia inhibitory factor receptor levels	• 11784 European	• 1585 European, NR
Zhao JH	GCST90274821	Monocyte chemoattractant protein-1 levels	• 14733 European	• 1585 European, NR
Zhao JH	GCST90274822	Monocyte chemoattractant protein 2 levels	• 14736 European	• 1585 European, NR
Zhao JH	GCST90274823	Monocyte chemoattractant protein-3 levels	• 11783 European	• 1585 European, NR
Zhao JH	GCST90274824	Monocyte chemoattractant protein-4 levels	• 14736 European	• 1585 European, NR
Zhao JH	GCST90274825	Macrophage inflammatory protein 1a levels	• 14743 European	• 1585 European, NR
Zhao JH	GCST90274826	Matrix metalloproteinase-1 levels	• 14744 European	• 1585 European, NR
Zhao JH	GCST90274827	Matrix metalloproteinase-10 levels	• 14744 European	• 1585 European, NR
Zhao JH	GCST90274828	Neurturin levels	• 11791 European	• 1585 European, NR
Zhao JH	GCST90274829	Neurotrophin-3 levels	• 14744 European	• 1585 European, NR
Zhao JH	GCST90274830	Osteoprotegerin levels	• 14733 European	• 1585 European, NR
Zhao JH	GCST90274831	Oncostatin-M levels	• 14736 European	• 1585 European, NR
Zhao JH	GCST90274832	Programmed cell death 1 ligand 1 levels	• 14736 European	• 1585 European, NR
Zhao JH	GCST90274833	Stem cell factor levels	• 14736 European	• 1585 European, NR
Zhao JH	GCST90274834	SIR2-like protein 2 levels	• 14736 European	• 1585 European, NR
Zhao JH	GCST90274835	Signaling lymphocytic activation molecule levels	• 14734 European	• 1585 European, NR
Zhao JH	GCST90274836	Sulfotransferase 1A1 levels	• 11793 European	• 1585 European, NR
Zhao JH	GCST90274837	STAM binding protein levels	• 14736 European	• 1585 European, NR
Zhao JH	GCST90274838	Transforming growth factor-alpha levels	• 14733 European	• 1585 European, NR
Zhao JH	GCST90274839	Tumor necrosis factor levels	• 11785 European	• 1585 European, NR
Zhao JH	GCST90274840	TNF-beta levels	• 11792 European	• 1585 European, NR
Zhao JH	GCST90274841	Tumor necrosis factor receptor superfamily member 9 levels	• 11784 European	• 1585 European, NR
Zhao JH	GCST90274842	Tumor necrosis factor ligand superfamily member 14 levels	• 11793 European	• 1585 European, NR
Zhao JH	GCST90274843	TNF-related apoptosis-inducing ligand levels	• 14735 European	• 1585 European, NR
Zhao JH	GCST90274844	TNF-related activation-induced cytokine levels	• 14736 European	• 1585 European, NR
Zhao JH	GCST90274845	Thymic stromal lymphopoietin levels	• 11793 European	• 1585 European, NR
Zhao JH	GCST90274846	Tumor necrosis factor ligand superfamily member 12 levels	• 14736 European	• 1585 European, NR
Zhao JH	GCST90274847	Urokinase-type plasminogen activator levels	• 14734 European	• 1585 European, NR
Zhao JH	GCST90274848	Vascular endothelial growth factor A levels	• 14744 European	• 1585 European, NR
