# Supplementary material for: Genome-wide association analysis reveals potential genetic correlation and causality between circulating inflammatory proteins and amyotrophic lateral sclerosis
Source: Aging (Albany NY). 2024 May 30;16(11):9470–84. doi: 10.18632/aging.205878 (PMC11210256; doi:10.18632/aging.205878)
Supplement: Supplementary Table 2 [file aging-16-205878-s002.xls]

## Sheet: content
content	Supplementary table
Data Sources	S1
Genetic correlation genetic overlap and genetic causation results between circulating inflammatory proteins and ALS	S2
Shared sites between C-C motif chemokine 28 levels and ALS	S3
Shared sites between Interleukin-18 levels and ALS	S4
Shared sites between C-X-C motif chemokine 1 levels and ALS	S5
Shared sites between Leukemia inhibitory factor receptor levels and ALS	S6
Results of Forward Mendelian Randomization Analysis between 91 inflammatory proteins and ALS (snp p<5e-8)	S7
Exclude rs112665079 and reperform the Mendelian randomization analysis	S8
Results of Reverse Mendelian Randomization Analysis between 91 inflammatory proteins and ALS	S9

## Sheet: Supplementary Table 2
Supplementary Table 2. Genetic correlation, genetic overlap and genetic causation results between circulating inflammatory proteins and ALS.
		LDSC			HDL			GPA		MR（Forward -8）	MR（reverse-8）	MR（Forward-7）	MR（Forward-6）
ID	Trait(s)	rg	rg_se	rg_p	rg	rg.se	P	statistics	pvalue	pvalue	pvalue	pvalue	pvalue
GCST90274758	Eukaryotic translation initiation factor 4E-binding protein 1 levels	0.0028634	0.159437	0.985671	NA	2.78212	1e-300	1.942	0.163	0.998983	0.717643	0.865113	0.890543
GCST90274759	Adenosine Deaminase levels	0.122695	0.601855	0.838461	NA	NA	NA	108.325	2.28e-25	0.047865	0.906287	0.0248054	0.0365464
GCST90274760	Artemin levels	-0.0801327	0.327405	0.806649	NA	NA	NA	1.284	0.257	NA	0.193648	NA	0.816945
GCST90274761	Axin-1 levels	-0.0458351	0.190851	0.810205	NA	0.517367	1e-300	0.283	0.594	NA	0.19395	0.573941	0.210309
GCST90274762	beta-nerve growth factor levels	-0.133722	0.157306	0.395282	NA	NA	NA	1402.31	6.63e-307	0.83302	0.296021	0.909053	0.92036
GCST90274763	Caspase 8 levels	0.16382	0.199518	0.411602	NA	NA	NA	3.016	0.0824	NA	0.872219	0.632423	0.983663
GCST90274764	Eotaxin levels	0.00959724	0.109712	0.930293	-0.0555395	0.119361	0.641712	2.786	0.0951	0.328102	0.157951	0.353631	0.495938
GCST90274765	C-C motif chemokine 19 levels	-0.0620973	0.109444	0.570452	-0.0786036	0.123653	0.524987	1165.39	2.03e-255	0.945354	0.181292	0.867368	0.891264
GCST90274766	C-C motif chemokine 20 levels	-0.000736726	0.116283	0.994945	-0.146029	0.386585	0.705624	94.865	2.04e-22	0.501268	0.019918	0.336968	0.291248
GCST90274767	C-C motif chemokine 23 levels	-0.17439	0.22237	0.432904	NA	NA	NA	6.454	0.0111	0.567362	0.74406	0.400557	0.337894
GCST90274768	C-C motif chemokine 25 levels	-0.033211	0.120199	0.782318	-0.0531213	0.164771	0.747153	1.934	0.164	0.135538	0.954177	0.215494	0.232
GCST90274769	C-C motif chemokine 28 levels	0.222198	0.109722	0.0428576	0.192177	0.146282	0.188932	31.38	2.12e-08	0.758168	0.155158	0.567317	0.313184
GCST90274770	C-C motif chemokine 4 levels	-0.0932699	0.122293	0.445655	-0.217335	0.126211	0.0850706	77.014	1.7e-18	0.550734	0.309886	0.485642	0.548187
GCST90274771	Natural killer cell receptor 2B4 levels	-0.0799123	0.111963	0.47539	-0.064621	0.128563	0.615216	3.819	0.0507	0.541583	0.396444	0.438948	0.140509
GCST90274772	CD40L receptor levels	-0.428773	0.184478	0.0201124	-0.395154	0.264129	0.134636	0.459	0.498	0.482961	0.454969	0.395238	0.255526
GCST90274773	T-cell surface glycoprotein CD5 levels	-0.135128	0.107864	0.210289	-0.100244	0.137464	0.46586	5650.23	1e-300	0.648255	0.586532	0.426201	0.991734
GCST90274774	T-cell surface glycoprotein CD6 isoform levels	-0.0985742	0.138734	0.477378	0.0104952	0.135096	0.938077	47.22	6.34e-12	0.750213	0.312004	0.84584	0.937152
GCST90274775	CUB domain-containing protein 1 levels	-0.147985	0.123812	0.231995	-0.375224	0.196876	0.0566637	595.374	1.7e-131	0.253161	0.748397	0.191388	0.680871
GCST90274776	Macrophage colony-stimulating factor 1 levels	-0.165678	0.146941	0.259526	-0.116515	0.191742	0.54341	8.193	0.00421	NA	0.453655	NA	0.845671
GCST90274777	Cystatin D levels	0.102441	0.115936	0.376914	0.0168929	0.179761	0.92513	25.706	3.98e-07	0.65025	0.600719	0.526564	0.675342
GCST90274778	Fractalkine levels	-0.0135283	0.140007	0.923024	0.131399	0.277676	0.636063	3210.95	1e-300	0.164785	0.80214	0.24795	0.351601
GCST90274779	C-X-C motif chemokine 1 levels	-0.491974	0.387378	0.204081	NA	29.0266	1e-300	4.762	0.0291	0.736562	0.776663	0.685442	0.853775
GCST90274780	C-X-C motif chemokine 10 levels	-0.0936367	0.114666	0.414155	-0.199605	0.202311	0.323825	218.264	2.16e-49	0.839358	0.9951	0.884025	0.302285
GCST90274781	C-X-C motif chemokine 11 levels	-0.0373165	0.116158	0.748015	-0.108128	0.131835	0.412116	17.514	2.85e-05	0.808947	0.281195	0.82392	0.839616
GCST90274782	C-X-C motif chemokine 5 levels	-0.190674	0.165759	0.250016	-0.263125	0.545119	0.629314	18.161	2.03e-05	0.216016	0.983906	0.178071	0.106106
GCST90274783	C-X-C motif chemokine 6 levels	-0.223924	0.141797	0.114295	-0.382138	0.138595	0.00582924	3.995	0.0456	0.654563	0.338378	0.806619	0.740719
GCST90274784	C-X-C motif chemokine 9 levels	-0.0977139	0.108489	0.367759	-0.132848	0.165184	0.421255	43.916	3.43e-11	0.98977	0.509242	0.690132	0.92102
GCST90274785	Delta and Notch-like epidermal growth factor-related receptor levels	0.0133617	0.129428	0.917775	-0.119505	0.22232	0.590898	21.928	2.83e-06	0.672333	0.480636	0.672333	0.160623
GCST90274786	Protein S100-A12 levels	0.197399	0.164556	0.230302	NA	NA	NA	20.92	4.79e-06	0.111077	0.311438	0.15532	0.294211
GCST90274787	Fibroblast growth factor 19 levels	0.115774	0.118914	0.330256	0.101578	0.0730638	0.164451	0.13	0.718	0.229877	0.747527	0.229877	0.729184
GCST90274788	Fibroblast growth factor 21 levels	-0.168974	0.124648	0.175224	-0.31698	0.259662	0.222184	16.19	5.73e-05	0.207729	0.818972	0.718182	0.786668
GCST90274789	Fibroblast growth factor 23 levels	-0.0483868	0.132343	0.714651	NA	0	1e-300	0.119	0.73	0.544684	0.560469	0.525375	0.0983753
GCST90274790	Fibroblast growth factor 5 levels	0.121357	0.187834	0.518221	NA	NA	NA	12.763	0.000354	0.156456	0.64726	0.156456	0.30956
GCST90274791	Fms-related tyrosine kinase 3 ligand levels	-0.0785185	0.093768	0.402384	-0.0606736	0.103421	0.557427	236.085	2.81e-53	0.310363	0.7291	0.454207	0.169393
GCST90274792	Glial cell line-derived neurotrophic factor levels	-0.087543	0.148439	0.555352	-0.369568	0.361077	0.306065	1.241	0.265	0.0672296	0.0751438	0.0672296	0.46371
GCST90274793	Hepatocyte growth factor levels	-0.0679633	0.16751	0.684944	-0.215642	0.53305	0.685812	-3.757	1	0.962746	0.724435	0.478674	0.0567551
GCST90274794	Interferon gamma levels	-0.593623	0.30788	0.0538425	NA	NA	NA	1.784	0.182	NA	0.876854	NA	0.654344
GCST90274795	Interleukin-10 levels	0.0369782	0.138384	0.789304	-0.486946	3.27491	0.881798	787.79	2.44e-173	0.65047	0.487988	0.627711	0.0109479
GCST90274796	Interleukin-10 receptor subunit alpha levels	0.0924339	0.14101	0.512136	0.0522399	0.21873	0.811235	5.668	0.0173	NA	0.848154	NA	0.780801
GCST90274797	Interleukin-10 receptor subunit beta levels	-0.205357	0.138144	0.137135	-0.2104	0.141958	0.138305	8.474	0.0036	0.621815	0.978126	0.654052	0.651692
GCST90274798	Interleukin-12 subunit beta levels	-0.0969276	0.122557	0.429016	-0.132974	0.105441	0.207264	908.417	1.45e-199	0.980685	0.0605285	0.471699	0.167592
GCST90274799	Interleukin-13 levels	NA	NA	NA	NA	NA	NA	-0.166	1	NA	0.143858	0.121143	0.0613924
GCST90274800	Interleukin-15 receptor subunit alpha levels	-0.129509	0.212665	0.542536	NA	1.13359	1e-300	0.046	0.83	0.517797	0.952471	0.517797	0.814073
GCST90274801	Interleukin-17A levels	-0.102756	0.129375	0.427052	-0.235843	0.218271	0.279918	802.902	1.26e-176	NA	0.72318	NA	0.676589
GCST90274802	Interleukin-17C levels	0.110969	0.126396	0.379975	-0.0483789	0.135758	0.721569	8.818	0.00298	0.0473315	0.338084	0.0591897	0.833943
GCST90274803	Interleukin-18 levels	0.313092	0.144002	0.0296885	0.152593	0.12197	0.210909	28.31	1.03e-07	0.941573	0.541841	0.749886	0.450782
GCST90274804	interleukin-18 receptor 1 levels	-0.119303	0.196084	0.542904	-0.0304029	0.0341316	0.37306	42.262	7.98e-11	0.825271	0.361873	0.762888	0.764905
GCST90274805	Interleukin-1-alpha levels	0.344501	0.216664	0.111829	NA	NA	NA	386.057	5.97e-86	NA	0.415385	0.207803	0.565569
GCST90274806	Interleukin-2 levels	0.139417	0.167557	0.405376	0.346773	0.315008	0.270967	18.769	1.48e-05	NA	0.0948641	NA	0.7352
GCST90274807	Interleukin-20 levels	-0.187767	0.170436	0.270596	NA	NA	NA	3.917	0.0478	NA	0.965426	NA	0.341366
GCST90274808	Interleukin-20 receptor subunit alpha levels	NA	NA	NA	NA	NA	NA	0.038	0.846	NA	0.598125	NA	0.652613
GCST90274809	Interleukin-22 receptor subunit alpha-1 levels	0.00638844	0.211691	0.975925	NA	3.18447	1e-300	-0.008	1	NA	0.553636	NA	0.803879
GCST90274810	Interleukin-24 levels	-0.165776	0.453947	0.71497	NA	NA	NA	0.03	0.863	NA	0.62011	NA	0.766742
GCST90274811	Interleukin-2 receptor subunit beta levels	-0.0618213	0.176533	0.726191	-0.759496	1.30142	0.559497	0.02	0.888	NA	0.189267	NA	0.526761
GCST90274812	Interleukin-33 levels	NA	NA	NA	NA	NA	NA	0.045	0.832	NA	0.0636675	NA	0.762943
GCST90274813	Interleukin-4 levels	0.0507689	0.150339	0.735592	0.164236	0.426857	0.700418	0.907	0.341	NA	0.914102	NA	0.713505
GCST90274814	Interleukin-5 levels	NA	NA	NA	NA	NA	NA	0.004	0.952	NA	0.0305861	NA	0.883824
GCST90274815	Interleukin-6 levels	-0.332945	0.228303	0.144744	NA	NA	NA	2.375	0.123	NA	0.622341	NA	0.926333
GCST90274816	Interleukin-7 levels	-0.175014	0.151835	0.24905	NA	NA	NA	18.568	1.64e-05	NA	0.636109	NA	0.20001
GCST90274817	Interleukin-8 levels	-0.276716	0.278985	0.321263	NA	NA	NA	10.882	0.000971	0.767636	0.548931	0.554272	0.22598
GCST90274818	Latency-associated peptide transforming growth factor beta 1 levels	-0.0354631	0.194056	0.854997	NA	NA	NA	-19.986	1	0.977867	0.213191	0.980716	0.838344
GCST90274819	Leukemia inhibitory factor levels	-0.157344	0.253057	0.53409	NA	NA	NA	1.584	0.208	NA	0.601815	NA	0.548918
GCST90274820	Leukemia inhibitory factor receptor levels	0.0200004	0.192515	0.917257	NA	0.966803	1e-300	138.276	6.34e-32	0.0166727	0.708543	0.0290611	0.101692
GCST90274821	Monocyte chemoattractant protein-1 levels	-0.113031	0.141917	0.425764	-0.192433	0.293682	0.51231	38.759	4.79e-10	0.683358	0.422635	0.788635	0.665153
GCST90274822	Monocyte chemoattractant protein 2 levels	-0.178643	0.167178	0.285259	-0.163121	0.112375	0.146619	17.919	2.31e-05	0.58102	0.977465	0.734662	0.457837
GCST90274823	Monocyte chemoattractant protein-3 levels	-0.141884	0.136224	0.297621	-0.364593	0.244497	0.13591	9.398	0.00217	0.650541	0.526637	0.691057	0.551312
GCST90274824	Monocyte chemoattractant protein-4 levels	-0.173164	0.0950796	0.0685689	-0.188656	0.139299	0.175634	29.795	4.8e-08	0.887265	0.682421	0.887265	0.612403
GCST90274825	Macrophage inflammatory protein 1a levels	-0.166056	0.146808	0.258009	-0.294208	0.236483	0.213463	30.154	3.99e-08	0.729312	0.933959	0.575131	0.41732
GCST90274826	Matrix metalloproteinase-1 levels	-0.0609851	0.164463	0.710777	-0.30085	0.68399	0.660049	34.718	3.81e-09	0.703864	0.251695	0.708857	0.722103
GCST90274827	Matrix metalloproteinase-10 levels	0.0924543	0.163848	0.57257	-0.0912012	0.669253	0.891605	11.668	0.000636	0.144363	0.60986	0.18347	0.251156
GCST90274828	Neurturin levels	0.381935	0.352486	0.278566	NA	NA	NA	7.621	0.00577	NA	0.437503	0.0399402	0.639686
GCST90274829	Neurotrophin-3 levels	-0.217549	0.152159	0.152789	NA	NA	NA	-0.179	1	NA	0.0814723	0.728723	0.609232
GCST90274830	Osteoprotegerin levels	-0.100258	0.126045	0.426369	-0.15561	0.136948	0.255844	5.878	0.0153	0.0848746	0.341896	0.020226	0.0309943
GCST90274831	Oncostatin-M levels	0.108041	0.13962	0.439035	0.180938	0.334862	0.588965	195.961	1.59e-44	0.016017	0.409665	0.326336	0.246441
GCST90274832	Programmed cell death 1 ligand 1 levels	-0.0482413	0.143952	0.737534	-0.184776	0.260403	0.477967	13.473	0.000242	NA	0.798167	0.47421	0.826028
GCST90274833	Stem cell factor levels	0.0285478	0.0932363	0.759462	0.017043	0.126771	0.893055	80.365	3.11e-19	0.496404	0.179657	0.464241	0.513741
GCST90274834	SIR2-like protein 2 levels	-0.106964	0.236816	0.651502	NA	NA	NA	0.034	0.854	NA	0.658834	0.0237973	0.210319
GCST90274835	Signaling lymphocytic activation molecule levels	-0.0390458	0.107865	0.717361	-0.134117	0.186443	0.471928	650.969	1.38e-143	0.608268	0.982653	0.255811	0.870104
GCST90274836	Sulfotransferase 1A1 levels	-0.00133712	0.293544	0.996366	0.0045278	0.203319	0.982233	1015.37	8.18e-223	0.170967	0.119469	0.276538	0.423908
GCST90274837	STAM binding protein levels	-0.117873	0.246854	0.633006	NA	NA	NA	0.581	0.446	NA	0.886787	0.686635	0.896699
GCST90274838	Transforming growth factor-alpha levels	0.173389	0.133364	0.193561	0.255814	0.320329	0.424524	226.135	4.15e-51	0.958099	0.469258	0.772361	0.840093
GCST90274839	Tumor necrosis factor levels	-0.0139649	0.917017	0.98785	NA	NA	NA	14.908	0.000113	NA	0.325177	NA	0.806726
GCST90274840	TNF-beta levels	-0.268866	0.208588	0.197405	-0.555309	1.73026	0.748256	5619.79	0	0.0735451	0.498771	0.0509881	0.0117617
GCST90274841	Tumor necrosis factor receptor superfamily member 9 levels	-0.152742	0.11181	0.171911	-0.100948	0.124014	0.415642	59.416	1.28e-14	0.30958	0.610209	0.435379	0.466566
GCST90274842	Tumor necrosis factor ligand superfamily member 14 levels	-0.0264876	0.162849	0.870793	0.0313078	0.191362	0.870042	5.15	0.0232	0.212837	0.992507	0.187778	0.171631
GCST90274843	TNF-related apoptosis-inducing ligand levels	0.129803	0.11531	0.260296	0.151571	0.146363	0.300397	3.501	0.0613	0.702924	0.628863	0.622451	0.254196
GCST90274844	TNF-related activation-induced cytokine levels	0.0137446	0.109954	0.900521	-0.120801	0.116225	0.298631	5.443	0.0196	0.966513	0.753851	0.82571	0.84335
GCST90274845	Thymic stromal lymphopoietin levels	0.124428	0.176231	0.480155	-0.0108362	0.235647	0.963322	351.696	1.81e-78	NA	0.284993	NA	0.320492
GCST90274846	Tumor necrosis factor ligand superfamily member 12 levels	0.0971432	0.123996	0.433369	0.192674	0.222175	0.385822	451.075	4.21e-100	0.438781	0.00969816	0.381145	0.498703
GCST90274847	Urokinase-type plasminogen activator levels	-0.0434065	0.121751	0.721451	-0.0578732	0.130569	0.657594	354.587	4.25e-79	0.626155	0.445237	0.514582	0.463626
GCST90274848	Vascular endothelial growth factor A levels	-0.209749	0.223199	0.347349	NA	NA	NA	8.926	0.00281	0.932009	0.421307	0.950295	0.867077
