# Supplementary material for: Genome-wide association analysis reveals potential genetic correlation and causality between circulating inflammatory proteins and amyotrophic lateral sclerosis
Source: Aging (Albany NY). 2024 May 30;16(11):9470–84. doi: 10.18632/aging.205878 (PMC11210256; doi:10.18632/aging.205878)
Supplement: Supplementary Table 3 [file aging-16-205878-s003.xls]

## Sheet: content
content	Supplementary table
Data Sources	S1
Genetic correlation genetic overlap and genetic causation results between circulating inflammatory proteins and ALS	S2
Shared sites between C-C motif chemokine 28 levels and ALS	S3
Shared sites between Interleukin-18 levels and ALS	S4
Shared sites between C-X-C motif chemokine 1 levels and ALS	S5
Shared sites between Leukemia inhibitory factor receptor levels and ALS	S6
Results of Forward Mendelian Randomization Analysis between 91 inflammatory proteins and ALS (snp p<5e-8)	S7
Exclude rs112665079 and reperform the Mendelian randomization analysis	S8
Results of Reverse Mendelian Randomization Analysis between 91 inflammatory proteins and ALS	S9

## Sheet: Supplementary Table 3
Supplementary Table 3. Shared sites between C-C motif chemokine 28 levels and ALS.
rsID	Chr	BP	Region	LeadSNPs	NearestGene	Func	CADD	RDB	P.PLACO	start	end	PP.H0.abf	PP.H1.abf	PP.H2.abf	PP.H3.abf	PP.H4.abf
rs895022	9	27484371	9p21.2	rs10967972	MOB3B	intronic	1.315	5	7.0697e-10	27325207	27529779	7.40208e-35	0.956123	1.4252e-36	0.0183838	0.0254928
rs895021	9	27484911	9p21.2	rs10967972	MOB3B	intronic	2.005	NA	1.10049e-09	27325207	27529779	7.40208e-35	0.956123	1.4252e-36	0.0183838	0.0254928
rs12115670	9	27486172	9p21.2	rs10967972	MOB3B	intronic	4.66	6	5.00531e-09	27325207	27529779	7.40208e-35	0.956123	1.4252e-36	0.0183838	0.0254928
rs17779457	9	27488092	9p21.2	rs10967972	MOB3B	intronic	4.639	1f	1.26101e-09	27325207	27529779	7.40208e-35	0.956123	1.4252e-36	0.0183838	0.0254928
rs868857	9	27488906	9p21.2	rs10967972	MOB3B	intronic	4.568	7	5.52007e-11	27325207	27529779	7.40208e-35	0.956123	1.4252e-36	0.0183838	0.0254928
rs17769038	9	27489693	9p21.2	rs10967972	MOB3B	intronic	5.536	3a	2.6625e-10	27325207	27529779	7.40208e-35	0.956123	1.4252e-36	0.0183838	0.0254928
rs2492815	9	27490296	9p21.2	rs10967972	MOB3B	intronic	1.808	NA	4.11909e-10	27325207	27529779	7.40208e-35	0.956123	1.4252e-36	0.0183838	0.0254928
rs9969707	9	27491104	9p21.2	rs10967972	MOB3B	intronic	5.989	6	1.64747e-10	27325207	27529779	7.40208e-35	0.956123	1.4252e-36	0.0183838	0.0254928
rs7019351	9	27491262	9p21.2	rs10967972	MOB3B	intronic	8.039	4	5.01492e-09	27325207	27529779	7.40208e-35	0.956123	1.4252e-36	0.0183838	0.0254928
rs2764332	9	27492522	9p21.2	rs10967972	MOB3B	intronic	8.961	6	3.17717e-10	27325207	27529779	7.40208e-35	0.956123	1.4252e-36	0.0183838	0.0254928
rs2764331	9	27492934	9p21.2	rs10967972	MOB3B	intronic	7.084	NA	4.22473e-10	27325207	27529779	7.40208e-35	0.956123	1.4252e-36	0.0183838	0.0254928
rs9969832	9	27493063	9p21.2	rs10967972	MOB3B	intronic	7.596	5	1.80881e-10	27325207	27529779	7.40208e-35	0.956123	1.4252e-36	0.0183838	0.0254928
rs2589049	9	27493409	9p21.2	rs10967972	MOB3B	intronic	2.796	NA	2.56035e-10	27325207	27529779	7.40208e-35	0.956123	1.4252e-36	0.0183838	0.0254928
rs10812604	9	27496661	9p21.2	rs10812605	MOB3B	intronic	12.22	6	1.81674e-08	27325207	27529779	7.40208e-35	0.956123	1.4252e-36	0.0183838	0.0254928
rs2440620	9	27497621	9p21.2	rs10967972	MOB3B	intronic	1.118	NA	1.09962e-09	27325207	27529779	7.40208e-35	0.956123	1.4252e-36	0.0183838	0.0254928
rs10967965	9	27497988	9p21.2	rs10967972	MOB3B	intronic	17.2	1f	1.24872e-08	27325207	27529779	7.40208e-35	0.956123	1.4252e-36	0.0183838	0.0254928
rs2492812	9	27499627	9p21.2	rs10967972	MOB3B	intronic	8.572	NA	3.64802e-10	27325207	27529779	7.40208e-35	0.956123	1.4252e-36	0.0183838	0.0254928
rs2492823	9	27502005	9p21.2	rs10967972	MOB3B	intronic	3.709	NA	8.07302e-11	27325207	27529779	7.40208e-35	0.956123	1.4252e-36	0.0183838	0.0254928
rs2492821	9	27503506	9p21.2	rs10967972	MOB3B	intronic	3.18	7	2.24197e-10	27325207	27529779	7.40208e-35	0.956123	1.4252e-36	0.0183838	0.0254928
rs2492818	9	27505639	9p21.2	rs10967972	MOB3B	intronic	3.1	NA	3.69458e-10	27325207	27529779	7.40208e-35	0.956123	1.4252e-36	0.0183838	0.0254928
rs10738774	9	27506051	9p21.2	rs10812605	MOB3B	intronic	5.181	5	1.25428e-08	27325207	27529779	7.40208e-35	0.956123	1.4252e-36	0.0183838	0.0254928
rs1319236	9	27507209	9p21.2	rs10812605	MOB3B	intronic	4.325	5	9.55854e-09	27325207	27529779	7.40208e-35	0.956123	1.4252e-36	0.0183838	0.0254928
rs2246591	9	27507804	9p21.2	rs10967972	MOB3B	intronic	0.565	7	3.21518e-10	27325207	27529779	7.40208e-35	0.956123	1.4252e-36	0.0183838	0.0254928
rs7036117	9	27507836	9p21.2	rs10812605	MOB3B	intronic	0.106	6	9.43739e-09	27325207	27529779	7.40208e-35	0.956123	1.4252e-36	0.0183838	0.0254928
rs1537712	9	27508489	9p21.2	rs10967972	MOB3B	intronic	6.621	NA	2.94683e-08	27325207	27529779	7.40208e-35	0.956123	1.4252e-36	0.0183838	0.0254928
rs12554036	9	27509211	9p21.2	rs10967972	MOB3B	intronic	0.525	7	6.33251e-11	27325207	27529779	7.40208e-35	0.956123	1.4252e-36	0.0183838	0.0254928
rs9408120	9	27509635	9p21.2	rs10967972	MOB3B	intronic	4.637	6	3.81774e-10	27325207	27529779	7.40208e-35	0.956123	1.4252e-36	0.0183838	0.0254928
rs2477520	9	27509870	9p21.2	rs10967972	MOB3B	intronic	1.972	7	4.14757e-10	27325207	27529779	7.40208e-35	0.956123	1.4252e-36	0.0183838	0.0254928
rs2477521	9	27509945	9p21.2	rs10967972	MOB3B	intronic	2.156	5	3.11419e-10	27325207	27529779	7.40208e-35	0.956123	1.4252e-36	0.0183838	0.0254928
rs10812605	9	27510360	9p21.2	rs10812605	MOB3B	intronic	0.989	7	1.28126e-09	27325207	27529779	7.40208e-35	0.956123	1.4252e-36	0.0183838	0.0254928
rs2492817	9	27511151	9p21.2	rs10967972	MOB3B	intronic	0.229	NA	3.98562e-08	27325207	27529779	7.40208e-35	0.956123	1.4252e-36	0.0183838	0.0254928
rs2484314	9	27511284	9p21.2	rs10967972	MOB3B	intronic	8.872	6	2.49111e-08	27325207	27529779	7.40208e-35	0.956123	1.4252e-36	0.0183838	0.0254928
rs2814709	9	27513298	9p21.2	rs10967972	MOB3B	intronic	2.121	NA	5.9335e-10	27325207	27529779	7.40208e-35	0.956123	1.4252e-36	0.0183838	0.0254928
rs10738775	9	27514318	9p21.2	rs10812605	MOB3B	intronic	6.203	7	3.59499e-09	27325207	27529779	7.40208e-35	0.956123	1.4252e-36	0.0183838	0.0254928
rs2440619	9	27514323	9p21.2	rs10967972	MOB3B	intronic	1.022	NA	3.12618e-10	27325207	27529779	7.40208e-35	0.956123	1.4252e-36	0.0183838	0.0254928
rs2783009	9	27514584	9p21.2	rs10967972	MOB3B	intronic	6.668	6	3.05695e-10	27325207	27529779	7.40208e-35	0.956123	1.4252e-36	0.0183838	0.0254928
rs4609281	9	27514962	9p21.2	rs10812605	MOB3B	intronic	3.545	7	1.27015e-08	27325207	27529779	7.40208e-35	0.956123	1.4252e-36	0.0183838	0.0254928
rs814030	9	27515194	9p21.2	rs10967972	MOB3B	intronic	0.824	6	4.84809e-10	27325207	27529779	7.40208e-35	0.956123	1.4252e-36	0.0183838	0.0254928
rs774353	9	27516436	9p21.2	rs10967972	MOB3B	intronic	2.117	6	3.81351e-08	27325207	27529779	7.40208e-35	0.956123	1.4252e-36	0.0183838	0.0254928
rs3849938	9	27517635	9p21.2	rs10812605	MOB3B	intronic	0.597	7	5.58911e-09	27325207	27529779	7.40208e-35	0.956123	1.4252e-36	0.0183838	0.0254928
rs700795	9	27520508	9p21.2	rs10967972	MOB3B	intronic	16.7	NA	6.74479e-10	27325207	27529779	7.40208e-35	0.956123	1.4252e-36	0.0183838	0.0254928
rs774349	9	27521908	9p21.2	rs10967972	MOB3B	intronic	0.131	7	1.72388e-09	27325207	27529779	7.40208e-35	0.956123	1.4252e-36	0.0183838	0.0254928
rs10967972	9	27523082	9p21.2	rs10967972	MOB3B	intronic	0.243	7	3.60112e-10	27325207	27529779	7.40208e-35	0.956123	1.4252e-36	0.0183838	0.0254928
rs3849939	9	27525221	9p21.2	rs10967972	MOB3B:IFNK	intronic	3.454	5	1.25916e-09	27325207	27529779	7.40208e-35	0.956123	1.4252e-36	0.0183838	0.0254928
rs2484316	9	27527173	9p21.2	rs10967972	MOB3B	intronic	1.686	7	2.53666e-09	27325207	27529779	7.40208e-35	0.956123	1.4252e-36	0.0183838	0.0254928
rs2453552	9	27527512	9p21.2	rs10967972	MOB3B	intronic	5.928	NA	1.29391e-09	27325207	27529779	7.40208e-35	0.956123	1.4252e-36	0.0183838	0.0254928
rs2764326	9	27535342	9p21.2	rs10967972	MOB3B	intergenic	1.219	6	4.00482e-10	27325207	27529779	7.40208e-35	0.956123	1.4252e-36	0.0183838	0.0254928
rs2814707	9	27536397	9p21.2	rs10967972	MOB3B	intergenic	10.04	NA	9.38332e-10	27325207	27529779	7.40208e-35	0.956123	1.4252e-36	0.0183838	0.0254928
rs2477523	9	27536894	9p21.2	rs10967972	MOB3B	intergenic	0.303	6	7.6519e-10	27325207	27529779	7.40208e-35	0.956123	1.4252e-36	0.0183838	0.0254928
rs3849941	9	27538948	9p21.2	rs10967972	C9orf72	intergenic	0.424	4	1.53904e-09	27546544	27573864	1.22913e-36	0.965016	2.91372e-39	0.00225489	0.0327287
rs3849942	9	27543281	9p21.2	rs10967972	C9orf72	intergenic	5.483	6	1.21696e-10	27546544	27573864	1.22913e-36	0.965016	2.91372e-39	0.00225489	0.0327287
rs3849943	9	27543382	9p21.2	rs10967972	C9orf72	intergenic	1.292	NA	1.1009e-10	27546544	27573864	1.22913e-36	0.965016	2.91372e-39	0.00225489	0.0327287
rs812858	9	27545467	9p21.2	rs10967972	C9orf72	intergenic	8.084	5	2.45527e-11	27546544	27573864	1.22913e-36	0.965016	2.91372e-39	0.00225489	0.0327287
rs700791	9	27545960	9p21.2	rs10967972	C9orf72	downstream	0.234	6	2.21685e-11	27546544	27573864	1.22913e-36	0.965016	2.91372e-39	0.00225489	0.0327287
rs2453565	9	27551040	9p21.2	rs10967972	C9orf72	intronic	9.98	6	2.05679e-11	27546544	27573864	1.22913e-36	0.965016	2.91372e-39	0.00225489	0.0327287
rs700828	9	27557537	9p21.2	rs10967972	C9orf72	intronic	4.444	6	4.36494e-11	27546544	27573864	1.22913e-36	0.965016	2.91372e-39	0.00225489	0.0327287
rs774356	9	27559721	9p21.2	rs10967972	C9orf72	intronic	5.526	6	7.90182e-11	27546544	27573864	1.22913e-36	0.965016	2.91372e-39	0.00225489	0.0327287
rs774357	9	27559835	9p21.2	rs10967972	C9orf72	intronic	2.654	7	1.386e-11	27546544	27573864	1.22913e-36	0.965016	2.91372e-39	0.00225489	0.0327287
rs774359	9	27561049	9p21.2	rs10967972	C9orf72	UTR3	1.404	5	4.49228e-11	27546544	27573864	1.22913e-36	0.965016	2.91372e-39	0.00225489	0.0327287
rs2453554	9	27561800	9p21.2	rs10967972	C9orf72	intronic	1.596	5	9.9731e-12	27546544	27573864	1.22913e-36	0.965016	2.91372e-39	0.00225489	0.0327287
rs2484319	9	27563755	9p21.2	rs10967972	C9orf72	intronic	1.647	6	1.43747e-11	27546544	27573864	1.22913e-36	0.965016	2.91372e-39	0.00225489	0.0327287
rs2453555	9	27563868	9p21.2	rs10967972	C9orf72	intronic	4.356	5	1.11307e-11	27546544	27573864	1.22913e-36	0.965016	2.91372e-39	0.00225489	0.0327287
rs3849945	9	27568817	9p21.2	rs10967972	C9orf72	intronic	1.008	6	4.67398e-12	27546544	27573864	1.22913e-36	0.965016	2.91372e-39	0.00225489	0.0327287
rs11789520	9	27574515	9p21.2	rs10967972	C9orf72	upstream	0.481	4	1.26352e-09	27546544	27573864	1.22913e-36	0.965016	2.91372e-39	0.00225489	0.0327287
