# Supplementary material for: Genome-wide association analysis reveals potential genetic correlation and causality between circulating inflammatory proteins and amyotrophic lateral sclerosis
Source: Aging (Albany NY). 2024 May 30;16(11):9470–84. doi: 10.18632/aging.205878 (PMC11210256; doi:10.18632/aging.205878)
Supplement: Supplementary Table 4 [file aging-16-205878-s004.xls]

## Sheet: content
content	Supplementary table
Data Sources	S1
Genetic correlation genetic overlap and genetic causation results between circulating inflammatory proteins and ALS	S2
Shared sites between C-C motif chemokine 28 levels and ALS	S3
Shared sites between Interleukin-18 levels and ALS	S4
Shared sites between C-X-C motif chemokine 1 levels and ALS	S5
Shared sites between Leukemia inhibitory factor receptor levels and ALS	S6
Results of Forward Mendelian Randomization Analysis between 91 inflammatory proteins and ALS (snp p<5e-8)	S7
Exclude rs112665079 and reperform the Mendelian randomization analysis	S8
Results of Reverse Mendelian Randomization Analysis between 91 inflammatory proteins and ALS	S9

## Sheet: Supplementary Table 4
Supplementary Table 4. Shared sites between Interleukin-18 levels and ALS.
rsID	Chr	BP	Region	LeadSNPs	NearestGene	Func	CADD	RDB	P.PLACO	start	end	PP.H0.abf	PP.H1.abf	PP.H2.abf	PP.H3.abf
rs419301	2	32497236	2p22.3	rs176416	YIPF4	intergenic	9.284	7	5.32503e-10	32502979	32541663	2.1585e-14	2.71777e-16	0.643252	0.00775018
rs449348	2	32499150	2p22.3	rs1153122	YIPF4	intergenic	3.426	7	8.68158e-12	32502979	32541663	2.1585e-14	2.71777e-16	0.643252	0.00775018
rs444226	2	32499167	2p22.3	rs176416	YIPF4	intergenic	4.919	6	5.67864e-10	32502979	32541663	2.1585e-14	2.71777e-16	0.643252	0.00775018
rs433248	2	32499173	2p22.3	rs176416	YIPF4	intergenic	3.508	7	7.09107e-10	32502979	32541663	2.1585e-14	2.71777e-16	0.643252	0.00775018
rs805830	2	32501475	2p22.3	rs1153122	YIPF4	intergenic	1.456	5	1.77392e-09	32502979	32541663	2.1585e-14	2.71777e-16	0.643252	0.00775018
rs387780	2	32502495	2p22.3	rs1153122	YIPF4	upstream	9.695	4	1.55784e-10	32502979	32541663	2.1585e-14	2.71777e-16	0.643252	0.00775018
rs398290	2	32503526	2p22.3	rs1153122	YIPF4	intronic	6.708	4	1.42606e-10	32502979	32541663	2.1585e-14	2.71777e-16	0.643252	0.00775018
rs4952255	2	32507792	2p22.3	rs1153122	YIPF4	intronic	0.951	6	2.30354e-11	32502979	32541663	2.1585e-14	2.71777e-16	0.643252	0.00775018
rs376914	2	32508393	2p22.3	rs1153122	YIPF4	intronic	1.648	6	1.01908e-10	32502979	32541663	2.1585e-14	2.71777e-16	0.643252	0.00775018
rs390480	2	32510072	2p22.3	rs1153122	YIPF4	intronic	1.729	NA	8.62438e-11	32502979	32541663	2.1585e-14	2.71777e-16	0.643252	0.00775018
rs458628	2	32515398	2p22.3	rs1153122	YIPF4	intronic	1.291	5	5.69406e-11	32502979	32541663	2.1585e-14	2.71777e-16	0.643252	0.00775018
rs437764	2	32516378	2p22.3	rs176416	YIPF4	intronic	0.009	5	3.43257e-10	32502979	32541663	2.1585e-14	2.71777e-16	0.643252	0.00775018
rs1153121	2	32524912	2p22.3	rs176416	YIPF4	intronic	0.878	7	5.54163e-10	32502979	32541663	2.1585e-14	2.71777e-16	0.643252	0.00775018
rs455737	2	32528234	2p22.3	rs1153122	YIPF4	intronic	4.489	6	1.55534e-10	32502979	32541663	2.1585e-14	2.71777e-16	0.643252	0.00775018
rs1153122	2	32533457	2p22.3	rs1153122	YIPF4	UTR3	2.873	NA	4.71057e-13	32502979	32541663	2.1585e-14	2.71777e-16	0.643252	0.00775018
rs427177	2	32537827	2p22.3	rs10172510	YIPF4	UTR3	1.382	7	1.63131e-08	32502979	32541663	2.1585e-14	2.71777e-16	0.643252	0.00775018
rs466146	2	32539236	2p22.3	rs176416	YIPF4	UTR3	1.192	5	5.15205e-11	32502979	32541663	2.1585e-14	2.71777e-16	0.643252	0.00775018
rs35837551	2	32545499	2p22.3	rs1153122	AL133245.2	intergenic	1.453	7	6.91068e-11	32502979	32541663	2.1585e-14	2.71777e-16	0.643252	0.00775018
rs2038537	2	32545880	2p22.3	rs10172510	AL133245.2	upstream	1.408	7	2.4877e-08	32502979	32541663	2.1585e-14	2.71777e-16	0.643252	0.00775018
rs6755811	2	32549230	2p22.3	rs1153122	AL133245.2	intergenic	1.631	6	3.16088e-11	32502979	32541663	2.1585e-14	2.71777e-16	0.643252	0.00775018
rs6718214	2	32550485	2p22.3	rs176416	AL133245.2	intergenic	0.406	4	6.52997e-10	32502979	32541663	2.1585e-14	2.71777e-16	0.643252	0.00775018
rs75591480	2	32552611	2p22.3	rs1153122	AL133245.2	intergenic	1.879	6	5.3219e-11	32502979	32541663	2.1585e-14	2.71777e-16	0.643252	0.00775018
rs10172308	2	32555760	2p22.3	rs1153122	AL133245.2	intergenic	1.449	6	3.83286e-11	32502979	32541663	2.1585e-14	2.71777e-16	0.643252	0.00775018
rs7582322	2	32565001	2p22.3	rs1153122	AL133245.2	intergenic	0.405	7	9.1211e-10	32502979	32541663	2.1585e-14	2.71777e-16	0.643252	0.00775018
rs62136260	2	32575447	2p22.3	rs176416	BIRC6	intergenic	1.17	7	2.10288e-09	32582096	32843966	1.41836e-11	1.31304e-12	0.535372	0.0491463
rs12712327	2	32579219	2p22.3	rs1153122	BIRC6	intergenic	2.866	7	1.80179e-10	32582096	32843966	1.41836e-11	1.31304e-12	0.535372	0.0491463
rs12612824	2	32579759	2p22.3	rs1153122	BIRC6	intergenic	10.06	5	2.49598e-10	32582096	32843966	1.41836e-11	1.31304e-12	0.535372	0.0491463
rs4952262	2	32597234	2p22.3	rs176416	BIRC6	intronic	0.776	7	3.35715e-08	32582096	32843966	1.41836e-11	1.31304e-12	0.535372	0.0491463
rs1991626	2	32602450	2p22.3	rs176416	BIRC6	intronic	0.516	7	2.94026e-08	32582096	32843966	1.41836e-11	1.31304e-12	0.535372	0.0491463
rs4019436	2	32603640	2p22.3	rs1153122	BIRC6:BIRC6-AS1	ncRNA_intronic	1.116	7	3.5994e-11	32582096	32843966	1.41836e-11	1.31304e-12	0.535372	0.0491463
rs762025	2	32603805	2p22.3	rs1153122	BIRC6:BIRC6-AS1	ncRNA_intronic	0.555	7	4.73476e-12	32582096	32843966	1.41836e-11	1.31304e-12	0.535372	0.0491463
rs6760040	2	32608201	2p22.3	rs176416	BIRC6	intronic	0.438	7	3.9747e-09	32582096	32843966	1.41836e-11	1.31304e-12	0.535372	0.0491463
rs4019431	2	32615493	2p22.3	rs1153122	BIRC6	intronic	0.853	7	6.22807e-10	32582096	32843966	1.41836e-11	1.31304e-12	0.535372	0.0491463
rs3769600	2	32616879	2p22.3	rs10172510	BIRC6	intronic	2.146	NA	3.91968e-09	32582096	32843966	1.41836e-11	1.31304e-12	0.535372	0.0491463
rs4952212	2	32618493	2p22.3	rs176416	BIRC6	intronic	0.335	7	2.825e-10	32582096	32843966	1.41836e-11	1.31304e-12	0.535372	0.0491463
rs10172510	2	32620888	2p22.3	rs10172510	BIRC6	intronic	7.415	5	2.64581e-09	32582096	32843966	1.41836e-11	1.31304e-12	0.535372	0.0491463
rs116617324	2	32622709	2p22.3	rs10172510	BIRC6	intronic	1.251	6	2.33621e-08	32582096	32843966	1.41836e-11	1.31304e-12	0.535372	0.0491463
rs176401	2	32636511	2p22.3	rs1153122	BIRC6	intronic	0.541	6	1.50627e-09	32582096	32843966	1.41836e-11	1.31304e-12	0.535372	0.0491463
rs176403	2	32637864	2p22.3	rs1153122	BIRC6	intronic	0.013	5	5.82409e-12	32582096	32843966	1.41836e-11	1.31304e-12	0.535372	0.0491463
rs74177012	2	32638122	2p22.3	rs1153122	BIRC6	intronic	3.683	4	1.49377e-08	32582096	32843966	1.41836e-11	1.31304e-12	0.535372	0.0491463
rs176404	2	32638846	2p22.3	rs10172510	BIRC6	intronic	3.043	5	6.43949e-09	32582096	32843966	1.41836e-11	1.31304e-12	0.535372	0.0491463
rs176405	2	32639198	2p22.3	rs176416	BIRC6	intronic	1.183	7	7.46964e-10	32582096	32843966	1.41836e-11	1.31304e-12	0.535372	0.0491463
rs176410	2	32643437	2p22.3	rs176416	BIRC6	intronic	3.075	4	9.67658e-10	32582096	32843966	1.41836e-11	1.31304e-12	0.535372	0.0491463
rs176411	2	32643528	2p22.3	rs10172510	BIRC6	intronic	3.321	4	6.86964e-09	32582096	32843966	1.41836e-11	1.31304e-12	0.535372	0.0491463
rs176413	2	32646847	2p22.3	rs176416	BIRC6	intronic	1.274	5	1.28728e-09	32582096	32843966	1.41836e-11	1.31304e-12	0.535372	0.0491463
rs176415	2	32649778	2p22.3	rs1153122	BIRC6	intronic	0.189	6	1.64094e-11	32582096	32843966	1.41836e-11	1.31304e-12	0.535372	0.0491463
rs176416	2	32652223	2p22.3	rs176416	BIRC6	intronic	0.677	7	4.6719e-11	32582096	32843966	1.41836e-11	1.31304e-12	0.535372	0.0491463
rs6733396	2	32663684	2p22.3	rs176416	BIRC6	intronic	0.477	6	8.91479e-10	32582096	32843966	1.41836e-11	1.31304e-12	0.535372	0.0491463
rs13409142	2	32666137	2p22.3	rs1153122	BIRC6	intronic	2.311	7	3.23779e-11	32582096	32843966	1.41836e-11	1.31304e-12	0.535372	0.0491463
rs2276592	2	32667562	2p22.3	rs1153122	BIRC6	intronic	12.16	NA	8.37966e-10	32582096	32843966	1.41836e-11	1.31304e-12	0.535372	0.0491463
rs10181198	2	32686582	2p22.3	rs1153122	BIRC6	intronic	1.258	6	1.28723e-10	32582096	32843966	1.41836e-11	1.31304e-12	0.535372	0.0491463
rs762019	2	32688601	2p22.3	rs10172510	BIRC6	intronic	17.43	7	2.72025e-08	32582096	32843966	1.41836e-11	1.31304e-12	0.535372	0.0491463
rs3769597	2	32691400	2p22.3	rs10172510	BIRC6	intronic	5	NA	3.90503e-08	32582096	32843966	1.41836e-11	1.31304e-12	0.535372	0.0491463
rs1033751	2	32695759	2p22.3	rs10172510	BIRC6	intronic	9.03	7	1.48094e-08	32582096	32843966	1.41836e-11	1.31304e-12	0.535372	0.0491463
rs10182170	2	32704186	2p22.3	rs1153122	BIRC6	intronic	6.334	5	2.63933e-10	32582096	32843966	1.41836e-11	1.31304e-12	0.535372	0.0491463
rs762023	2	32713170	2p22.3	rs176416	BIRC6	intronic	1.381	7	7.30396e-10	32582096	32843966	1.41836e-11	1.31304e-12	0.535372	0.0491463
rs2366894	2	32713706	2p22.3	rs1153122	BIRC6	exonic	17.61	7	5.69253e-10	32582096	32843966	1.41836e-11	1.31304e-12	0.535372	0.0491463
rs6543658	2	32718849	2p22.3	rs1153122	BIRC6	intronic	2.643	7	7.93827e-11	32582096	32843966	1.41836e-11	1.31304e-12	0.535372	0.0491463
rs13385788	2	32719692	2p22.3	rs176416	BIRC6	intronic	1.406	5	2.5331e-08	32582096	32843966	1.41836e-11	1.31304e-12	0.535372	0.0491463
rs58852184	2	32729763	2p22.3	rs176416	BIRC6	intronic	0.548	5	1.45451e-08	32582096	32843966	1.41836e-11	1.31304e-12	0.535372	0.0491463
rs17428810	2	32736043	2p22.3	rs1153122	BIRC6	intronic	7.3	5	3.95827e-12	32582096	32843966	1.41836e-11	1.31304e-12	0.535372	0.0491463
rs2069213	2	32743084	2p22.3	rs1153122	BIRC6	intronic	1.682	7	3.97388e-09	32582096	32843966	1.41836e-11	1.31304e-12	0.535372	0.0491463
rs62136327	2	32746605	2p22.3	rs176416	BIRC6	intronic	6.103	7	1.24613e-08	32582096	32843966	1.41836e-11	1.31304e-12	0.535372	0.0491463
rs1135484	2	32749060	2p22.3	rs176416	BIRC6	intronic	2.215	5	3.03522e-09	32582096	32843966	1.41836e-11	1.31304e-12	0.535372	0.0491463
rs2249109	2	32750879	2p22.3	rs1153122	BIRC6	intronic	0.607	5	6.49362e-11	32582096	32843966	1.41836e-11	1.31304e-12	0.535372	0.0491463
rs2710613	2	32753491	2p22.3	rs176416	BIRC6	intronic	3.125	6	7.77007e-09	32582096	32843966	1.41836e-11	1.31304e-12	0.535372	0.0491463
rs2710628	2	32758353	2p22.3	rs176416	BIRC6	intronic	2.962	NA	4.06185e-09	32582096	32843966	1.41836e-11	1.31304e-12	0.535372	0.0491463
rs2710627	2	32758627	2p22.3	rs1153122	BIRC6	intronic	5.297	NA	5.53582e-09	32582096	32843966	1.41836e-11	1.31304e-12	0.535372	0.0491463
rs2710626	2	32758754	2p22.3	rs176416	BIRC6	intronic	2.844	7	2.59813e-08	32582096	32843966	1.41836e-11	1.31304e-12	0.535372	0.0491463
rs2250217	2	32759643	2p22.3	rs176416	BIRC6	intronic	0.884	7	5.29155e-09	32582096	32843966	1.41836e-11	1.31304e-12	0.535372	0.0491463
rs10193023	2	32762379	2p22.3	rs176416	BIRC6	intronic	3.019	7	2.31053e-08	32582096	32843966	1.41836e-11	1.31304e-12	0.535372	0.0491463
rs6729952	2	32764922	2p22.3	rs10172510	BIRC6	intronic	2.638	7	2.54986e-08	32582096	32843966	1.41836e-11	1.31304e-12	0.535372	0.0491463
rs2254106	2	32768797	2p22.3	rs176416	BIRC6	intronic	0.943	7	4.71095e-08	32582096	32843966	1.41836e-11	1.31304e-12	0.535372	0.0491463
rs2243844	2	32775984	2p22.3	rs176416	BIRC6	intronic	0.221	6	1.03331e-08	32582096	32843966	1.41836e-11	1.31304e-12	0.535372	0.0491463
rs2754513	2	32782763	2p22.3	rs1153122	BIRC6	intronic	0.637	7	1.29054e-10	32582096	32843966	1.41836e-11	1.31304e-12	0.535372	0.0491463
rs6747560	2	32784766	2p22.3	rs1153122	BIRC6	intronic	0.896	6	4.01489e-09	32582096	32843966	1.41836e-11	1.31304e-12	0.535372	0.0491463
rs2754514	2	32788836	2p22.3	rs176416	BIRC6	intronic	1.402	6	5.18145e-09	32582096	32843966	1.41836e-11	1.31304e-12	0.535372	0.0491463
rs2710615	2	32791222	2p22.3	rs176416	BIRC6	intronic	3.53	4	1.46912e-09	32582096	32843966	1.41836e-11	1.31304e-12	0.535372	0.0491463
rs2754522	2	32801257	2p22.3	rs1153122	BIRC6	intronic	0.191	5	7.12057e-11	32582096	32843966	1.41836e-11	1.31304e-12	0.535372	0.0491463
rs2754525	2	32805286	2p22.3	rs1153122	BIRC6	intronic	0.864	7	3.51283e-10	32582096	32843966	1.41836e-11	1.31304e-12	0.535372	0.0491463
rs62136345	2	32807223	2p22.3	rs176416	BIRC6	intronic	0.268	7	1.94567e-08	32582096	32843966	1.41836e-11	1.31304e-12	0.535372	0.0491463
rs2710634	2	32808804	2p22.3	rs176416	BIRC6	intronic	2.582	6	5.92295e-11	32582096	32843966	1.41836e-11	1.31304e-12	0.535372	0.0491463
rs2754520	2	32810293	2p22.3	rs176416	BIRC6	intronic	0.695	7	1.20243e-08	32582096	32843966	1.41836e-11	1.31304e-12	0.535372	0.0491463
rs2710606	2	32811909	2p22.3	rs1153122	BIRC6	intronic	0.247	7	1.59528e-11	32582096	32843966	1.41836e-11	1.31304e-12	0.535372	0.0491463
rs2583713	2	32822729	2p22.3	rs176416	BIRC6	intronic	0.519	7	5.33893e-09	32582096	32843966	1.41836e-11	1.31304e-12	0.535372	0.0491463
rs2710625	2	32822957	2p22.3	rs176416	BIRC6	exonic	0.371	7	3.30858e-09	32582096	32843966	1.41836e-11	1.31304e-12	0.535372	0.0491463
rs2599510	2	32826002	2p22.3	rs176416	BIRC6	intronic	8.538	7	1.36773e-10	32582096	32843966	1.41836e-11	1.31304e-12	0.535372	0.0491463
rs1901355	2	32835664	2p22.3	rs1153122	BIRC6	intronic	1.085	5	1.50555e-12	32582096	32843966	1.41836e-11	1.31304e-12	0.535372	0.0491463
rs13035097	2	32836362	2p22.3	rs1153122	BIRC6	intronic	1.917	6	5.44538e-13	32582096	32843966	1.41836e-11	1.31304e-12	0.535372	0.0491463
rs2754523	2	32837110	2p22.3	rs176416	BIRC6	intronic	4.499	5	3.70086e-09	32582096	32843966	1.41836e-11	1.31304e-12	0.535372	0.0491463
rs6723226	2	32849207	2p22.3	rs1153122	TTC27	intergenic	2.521	7	8.57111e-12	32853099	33046118	3.05611e-05	1.2782e-06	0.734768	0.0304966
rs4952343	2	32858637	2p22.3	rs176416	TTC27	intronic	0.569	5	2.11264e-09	32853099	33046118	3.05611e-05	1.2782e-06	0.734768	0.0304966
rs12115670	9	27486172	9p21.2	rs700828	MOB3B	intronic	4.66	6	3.73911e-08	27325207	27529779	7.27572e-35	0.939801	2.70771e-36	0.0349501
rs7041409	9	27487221	9p21.2	rs700828	MOB3B	intronic	9.436	3a	3.93757e-08	27325207	27529779	7.27572e-35	0.939801	2.70771e-36	0.0349501
rs17779457	9	27488092	9p21.2	rs700828	MOB3B	intronic	4.639	1f	2.19878e-08	27325207	27529779	7.27572e-35	0.939801	2.70771e-36	0.0349501
rs868856	9	27489251	9p21.2	rs700828	MOB3B	intronic	16.3	4	9.83916e-09	27325207	27529779	7.27572e-35	0.939801	2.70771e-36	0.0349501
rs17769038	9	27489693	9p21.2	rs700828	MOB3B	intronic	5.536	3a	4.0115e-11	27325207	27529779	7.27572e-35	0.939801	2.70771e-36	0.0349501
rs2492815	9	27490296	9p21.2	rs700828	MOB3B	intronic	1.808	NA	2.26687e-08	27325207	27529779	7.27572e-35	0.939801	2.70771e-36	0.0349501
rs10435784	9	27490332	9p21.2	rs700828	MOB3B	intronic	1.689	7	7.53043e-09	27325207	27529779	7.27572e-35	0.939801	2.70771e-36	0.0349501
rs7046653	9	27490967	9p21.2	rs700828	MOB3B	intronic	2.407	7	1.07659e-08	27325207	27529779	7.27572e-35	0.939801	2.70771e-36	0.0349501
rs9969707	9	27491104	9p21.2	rs700828	MOB3B	intronic	5.989	6	2.18156e-10	27325207	27529779	7.27572e-35	0.939801	2.70771e-36	0.0349501
rs7019351	9	27491262	9p21.2	rs700828	MOB3B	intronic	8.039	4	5.15888e-10	27325207	27529779	7.27572e-35	0.939801	2.70771e-36	0.0349501
rs7019847	9	27491397	9p21.2	rs700828	MOB3B	intronic	2.187	4	1.00812e-08	27325207	27529779	7.27572e-35	0.939801	2.70771e-36	0.0349501
rs2764331	9	27492934	9p21.2	rs700828	MOB3B	intronic	7.084	NA	4.82962e-08	27325207	27529779	7.27572e-35	0.939801	2.70771e-36	0.0349501
rs9969832	9	27493063	9p21.2	rs700828	MOB3B	intronic	7.596	5	1.58543e-10	27325207	27529779	7.27572e-35	0.939801	2.70771e-36	0.0349501
rs2589049	9	27493409	9p21.2	rs700828	MOB3B	intronic	2.796	NA	4.73628e-08	27325207	27529779	7.27572e-35	0.939801	2.70771e-36	0.0349501
rs10812603	9	27494674	9p21.2	rs700828	MOB3B	intronic	1.726	7	8.85541e-09	27325207	27529779	7.27572e-35	0.939801	2.70771e-36	0.0349501
rs7864595	9	27495572	9p21.2	rs700828	MOB3B	intronic	1.589	5	5.50924e-09	27325207	27529779	7.27572e-35	0.939801	2.70771e-36	0.0349501
rs10812604	9	27496661	9p21.2	rs700828	MOB3B	intronic	12.22	6	2.17678e-09	27325207	27529779	7.27572e-35	0.939801	2.70771e-36	0.0349501
rs10967965	9	27497988	9p21.2	rs700828	MOB3B	intronic	17.2	1f	3.02744e-11	27325207	27529779	7.27572e-35	0.939801	2.70771e-36	0.0349501
rs10738774	9	27506051	9p21.2	rs700828	MOB3B	intronic	5.181	5	6.73781e-09	27325207	27529779	7.27572e-35	0.939801	2.70771e-36	0.0349501
rs1319236	9	27507209	9p21.2	rs700828	MOB3B	intronic	4.325	5	1.09967e-08	27325207	27529779	7.27572e-35	0.939801	2.70771e-36	0.0349501
rs7036117	9	27507836	9p21.2	rs700828	MOB3B	intronic	0.106	6	4.31737e-09	27325207	27529779	7.27572e-35	0.939801	2.70771e-36	0.0349501
rs12554036	9	27509211	9p21.2	rs700828	MOB3B	intronic	0.525	7	3.90312e-10	27325207	27529779	7.27572e-35	0.939801	2.70771e-36	0.0349501
rs2814709	9	27513298	9p21.2	rs700828	MOB3B	intronic	2.121	NA	5.33935e-09	27325207	27529779	7.27572e-35	0.939801	2.70771e-36	0.0349501
rs2814708	9	27513716	9p21.2	rs700828	MOB3B	intronic	0.603	7	3.15475e-08	27325207	27529779	7.27572e-35	0.939801	2.70771e-36	0.0349501
rs10738775	9	27514318	9p21.2	rs700828	MOB3B	intronic	6.203	7	8.77314e-10	27325207	27529779	7.27572e-35	0.939801	2.70771e-36	0.0349501
rs2440619	9	27514323	9p21.2	rs700828	MOB3B	intronic	1.022	NA	1.41472e-08	27325207	27529779	7.27572e-35	0.939801	2.70771e-36	0.0349501
rs2783009	9	27514584	9p21.2	rs700828	MOB3B	intronic	6.668	6	2.32891e-09	27325207	27529779	7.27572e-35	0.939801	2.70771e-36	0.0349501
rs4609281	9	27514962	9p21.2	rs700828	MOB3B	intronic	3.545	7	3.66845e-10	27325207	27529779	7.27572e-35	0.939801	2.70771e-36	0.0349501
rs814030	9	27515194	9p21.2	rs700828	MOB3B	intronic	0.824	6	5.28074e-09	27325207	27529779	7.27572e-35	0.939801	2.70771e-36	0.0349501
rs774355	9	27515794	9p21.2	rs700828	MOB3B	intronic	5.822	NA	4.11157e-08	27325207	27529779	7.27572e-35	0.939801	2.70771e-36	0.0349501
rs774354	9	27515967	9p21.2	rs700828	MOB3B	intronic	5.591	NA	2.44875e-08	27325207	27529779	7.27572e-35	0.939801	2.70771e-36	0.0349501
rs774353	9	27516436	9p21.2	rs700828	MOB3B	intronic	2.117	6	4.15747e-08	27325207	27529779	7.27572e-35	0.939801	2.70771e-36	0.0349501
rs774352	9	27516590	9p21.2	rs700828	MOB3B	intronic	1.501	6	2.26804e-08	27325207	27529779	7.27572e-35	0.939801	2.70771e-36	0.0349501
rs774351	9	27516640	9p21.2	rs700828	MOB3B	intronic	0.466	NA	2.26804e-08	27325207	27529779	7.27572e-35	0.939801	2.70771e-36	0.0349501
rs3849938	9	27517635	9p21.2	rs700828	MOB3B	intronic	0.597	7	2.58788e-10	27325207	27529779	7.27572e-35	0.939801	2.70771e-36	0.0349501
rs700795	9	27520508	9p21.2	rs700828	MOB3B	intronic	16.7	NA	6.66916e-09	27325207	27529779	7.27572e-35	0.939801	2.70771e-36	0.0349501
rs774349	9	27521908	9p21.2	rs700828	MOB3B	intronic	0.131	7	2.27944e-10	27325207	27529779	7.27572e-35	0.939801	2.70771e-36	0.0349501
rs10967972	9	27523082	9p21.2	rs700828	MOB3B	intronic	0.243	7	1.83534e-11	27325207	27529779	7.27572e-35	0.939801	2.70771e-36	0.0349501
rs3849939	9	27525221	9p21.2	rs700828	MOB3B:IFNK	intronic	3.454	5	5.92045e-12	27325207	27529779	7.27572e-35	0.939801	2.70771e-36	0.0349501
rs2484316	9	27527173	9p21.2	rs700828	MOB3B	intronic	1.686	7	2.97334e-10	27325207	27529779	7.27572e-35	0.939801	2.70771e-36	0.0349501
rs2453552	9	27527512	9p21.2	rs700828	MOB3B	intronic	5.928	NA	1.55614e-10	27325207	27529779	7.27572e-35	0.939801	2.70771e-36	0.0349501
rs2764326	9	27535342	9p21.2	rs700828	MOB3B	intergenic	1.219	6	2.39085e-11	27325207	27529779	7.27572e-35	0.939801	2.70771e-36	0.0349501
rs2814707	9	27536397	9p21.2	rs700828	MOB3B	intergenic	10.04	NA	5.3892e-11	27325207	27529779	7.27572e-35	0.939801	2.70771e-36	0.0349501
rs2477523	9	27536894	9p21.2	rs700828	MOB3B	intergenic	0.303	6	3.9513e-11	27325207	27529779	7.27572e-35	0.939801	2.70771e-36	0.0349501
rs3849941	9	27538948	9p21.2	rs700828	C9orf72	intergenic	0.424	4	1.17487e-12	27546544	27573864	1.21615e-36	0.954823	3.85753e-39	0.00298643
rs3849942	9	27543281	9p21.2	rs700828	C9orf72	intergenic	5.483	6	3.66687e-11	27546544	27573864	1.21615e-36	0.954823	3.85753e-39	0.00298643
rs3849943	9	27543382	9p21.2	rs700828	C9orf72	intergenic	1.292	NA	2.49245e-11	27546544	27573864	1.21615e-36	0.954823	3.85753e-39	0.00298643
rs812858	9	27545467	9p21.2	rs700828	C9orf72	intergenic	8.084	5	4.68997e-12	27546544	27573864	1.21615e-36	0.954823	3.85753e-39	0.00298643
rs700791	9	27545960	9p21.2	rs700828	C9orf72	downstream	0.234	6	2.14208e-12	27546544	27573864	1.21615e-36	0.954823	3.85753e-39	0.00298643
rs2453565	9	27551040	9p21.2	rs700828	C9orf72	intronic	9.98	6	1.0791e-11	27546544	27573864	1.21615e-36	0.954823	3.85753e-39	0.00298643
rs700828	9	27557537	9p21.2	rs700828	C9orf72	intronic	4.444	6	1.94716e-12	27546544	27573864	1.21615e-36	0.954823	3.85753e-39	0.00298643
rs774356	9	27559721	9p21.2	rs700828	C9orf72	intronic	5.526	6	4.292e-12	27546544	27573864	1.21615e-36	0.954823	3.85753e-39	0.00298643
rs774357	9	27559835	9p21.2	rs700828	C9orf72	intronic	2.654	7	1.28103e-12	27546544	27573864	1.21615e-36	0.954823	3.85753e-39	0.00298643
rs774359	9	27561049	9p21.2	rs700828	C9orf72	UTR3	1.404	5	3.50569e-12	27546544	27573864	1.21615e-36	0.954823	3.85753e-39	0.00298643
rs2453554	9	27561800	9p21.2	rs700828	C9orf72	intronic	1.596	5	1.02422e-12	27546544	27573864	1.21615e-36	0.954823	3.85753e-39	0.00298643
rs2484319	9	27563755	9p21.2	rs700828	C9orf72	intronic	1.647	6	5.1479e-12	27546544	27573864	1.21615e-36	0.954823	3.85753e-39	0.00298643
rs2453555	9	27563868	9p21.2	rs700828	C9orf72	intronic	4.356	5	2.47037e-12	27546544	27573864	1.21615e-36	0.954823	3.85753e-39	0.00298643
rs3849945	9	27568817	9p21.2	rs700828	C9orf72	intronic	1.008	6	1.11305e-12	27546544	27573864	1.21615e-36	0.954823	3.85753e-39	0.00298643
rs11789520	9	27574515	9p21.2	rs700828	C9orf72	upstream	0.481	4	1.60495e-14	27546544	27573864	1.21615e-36	0.954823	3.85753e-39	0.00298643
rs73440960	9	27578647	9p21.2	rs73440960	C9orf72	intergenic	1.317	6	1.79357e-15	27546544	27573864	1.21615e-36	0.954823	3.85753e-39	0.00298643
rs77203424	11	111994216	11q23.1	rs77203424	SDHD	intronic	12.44	7	4.78381e-09	111957497	111990353	0.997595	0.00125921	0.00110249	1.34969e-06
rs4239633	19	17742469	19p13.11	rs12608932	UNC13A	intronic	2.387	6	8.44273e-09	17712137	17799401	1.1652e-18	0.967906	1.5033e-21	0.00121788
rs78549703	19	17749542	19p13.11	rs12608932	UNC13A	intronic	1.87	7	8.06539e-09	17712137	17799401	1.1652e-18	0.967906	1.5033e-21	0.00121788
rs12608932	19	17752689	19p13.11	rs12608932	UNC13A	intronic	0.266	7	1.86814e-09	17712137	17799401	1.1652e-18	0.967906	1.5033e-21	0.00121788
rs12973192	19	17753239	19p13.11	rs12608932	UNC13A	intronic	9.58	4	4.41934e-08	17712137	17799401	1.1652e-18	0.967906	1.5033e-21	0.00121788
