# Supplementary material for: Genome-wide association analysis reveals potential genetic correlation and causality between circulating inflammatory proteins and amyotrophic lateral sclerosis
Source: Aging (Albany NY). 2024 May 30;16(11):9470–84. doi: 10.18632/aging.205878 (PMC11210256; doi:10.18632/aging.205878)
Supplement: Supplementary Table 5 [file aging-16-205878-s005.xls]

## Sheet: content
content	Supplementary table
Data Sources	S1
Genetic correlation genetic overlap and genetic causation results between circulating inflammatory proteins and ALS	S2
Shared sites between C-C motif chemokine 28 levels and ALS	S3
Shared sites between Interleukin-18 levels and ALS	S4
Shared sites between C-X-C motif chemokine 1 levels and ALS	S5
Shared sites between Leukemia inhibitory factor receptor levels and ALS	S6
Results of Forward Mendelian Randomization Analysis between 91 inflammatory proteins and ALS (snp p<5e-8)	S7
Exclude rs112665079 and reperform the Mendelian randomization analysis	S8
Results of Reverse Mendelian Randomization Analysis between 91 inflammatory proteins and ALS	S9

## Sheet: Supplementary Table 5
Supplementary Table 5. Shared sites between C-X-C motif chemokine 1 levels and ALS.
rsID	Chr	BP	Region	LeadSNPs	NearestGene	Func	CADD	RDB	P.PLACO	start	end	PP.H0.abf	PP.H1.abf	PP.H2.abf	PP.H3.abf	PP.H4.abf
rs34110034	4	74712002	4q13.3	rs34110034	CXCL6	intergenic	2.581	7	6.1798e-11	74702214	74714781	2.04058e-45	2.29801e-48	0.946247	0.00101288	0.0527401
rs2022736	4	74712514	4q13.3	rs2022736	CXCL6	intergenic	0.74	6	1.94559e-15	74702214	74714781	2.04058e-45	2.29801e-48	0.946247	0.00101288	0.0527401
rs1957067	4	74712531	4q13.3	rs2022736	CXCL6	intergenic	1.037	6	1.60277e-14	74702214	74714781	2.04058e-45	2.29801e-48	0.946247	0.00101288	0.0527401
rs7658970	4	74713950	4q13.3	rs2022736	CXCL6:PPBPP1	ncRNA_intronic	4.05	6	5.44773e-11	74702214	74714781	2.04058e-45	2.29801e-48	0.946247	0.00101288	0.0527401
rs2367288	4	74714098	4q13.3	rs2022736	CXCL6:PPBPP1	ncRNA_exonic	4.455	4	6.02734e-11	74702214	74714781	2.04058e-45	2.29801e-48	0.946247	0.00101288	0.0527401
rs16850084	4	74715881	4q13.3	rs74544699	CXCL6	intergenic	1.298	6	5.12126e-11	74702214	74714781	2.04058e-45	2.29801e-48	0.946247	0.00101288	0.0527401
rs79493598	4	74717158	4q13.3	rs74544699	PF4V1	intergenic	0.563	5	5.94991e-11	74718906	74719872	1.97046e-31	1.37642e-35	0.967911	3.55574e-05	0.0320538
rs28660462	4	74717696	4q13.3	rs74544699	PF4V1	intergenic	2.105	6	4.9661e-11	74718906	74719872	1.97046e-31	1.37642e-35	0.967911	3.55574e-05	0.0320538
rs872914	4	74718101	4q13.3	rs2022736	PF4V1	upstream	2.985	5	4.13859e-11	74718906	74719872	1.97046e-31	1.37642e-35	0.967911	3.55574e-05	0.0320538
rs941757	4	74718845	4q13.3	rs2022736	PF4V1	upstream	4.751	5	3.08324e-11	74718906	74719872	1.97046e-31	1.37642e-35	0.967911	3.55574e-05	0.0320538
rs941758	4	74718941	4q13.3	rs2022736	PF4V1	UTR5	10.96	4	2.22597e-11	74718906	74719872	1.97046e-31	1.37642e-35	0.967911	3.55574e-05	0.0320538
rs76797395	4	74725393	4q13.3	rs74544699	PF4V1	intergenic	2.369	5	9.01693e-12	74718906	74719872	1.97046e-31	1.37642e-35	0.967911	3.55574e-05	0.0320538
rs75019946	4	74727060	4q13.3	rs74544699	PF4V1	intergenic	0.437	6	1.02378e-12	74718906	74719872	1.97046e-31	1.37642e-35	0.967911	3.55574e-05	0.0320538
rs2145614	4	74728508	4q13.3	rs74544699	CXCL1	intergenic	0.224	7	2.58158e-12	74735110	74736959	7.4159e-63	3.59795e-66	0.949153	0.000410061	0.0504372
rs2180883	4	74729013	4q13.3	rs74544699	CXCL1	intergenic	1.041	7	4.90199e-12	74735110	74736959	7.4159e-63	3.59795e-66	0.949153	0.000410061	0.0504372
rs3111693	4	74730921	4q13.3	rs74544699	CXCL1	intergenic	0.65	4	4.6023e-12	74735110	74736959	7.4159e-63	3.59795e-66	0.949153	0.000410061	0.0504372
rs3117602	4	74732886	4q13.3	rs74544699	CXCL1	intergenic	1.726	7	3.74762e-12	74735110	74736959	7.4159e-63	3.59795e-66	0.949153	0.000410061	0.0504372
rs74544699	4	74734681	4q13.3	rs74544699	CXCL1	upstream	8.733	4	2.61388e-16	74735110	74736959	7.4159e-63	3.59795e-66	0.949153	0.000410061	0.0504372
rs7656335	4	74735524	4q13.3	rs74544699	CXCL1	intronic	4.614	3a	5.24173e-14	74735110	74736959	7.4159e-63	3.59795e-66	0.949153	0.000410061	0.0504372
rs1951233	4	74738851	4q13.3	rs74544699	CXCL1	intergenic	9.866	3a	4.30696e-15	74735110	74736959	7.4159e-63	3.59795e-66	0.949153	0.000410061	0.0504372
rs1957069	4	74740217	4q13.3	rs74544699	CXCL1	intergenic	0.634	5	5.49463e-14	74735110	74736959	7.4159e-63	3.59795e-66	0.949153	0.000410061	0.0504372
rs61412577	4	74742061	4q13.3	rs74544699	CXCL1	intergenic	1.079	6	8.89792e-14	74735110	74736959	7.4159e-63	3.59795e-66	0.949153	0.000410061	0.0504372
rs58610473	4	74742146	4q13.3	rs74544699	CXCL1	intergenic	3.551	7	3.58778e-14	74735110	74736959	7.4159e-63	3.59795e-66	0.949153	0.000410061	0.0504372
rs58324794	4	74742218	4q13.3	rs74544699	CXCL1	intergenic	1.331	7	4.68508e-14	74735110	74736959	7.4159e-63	3.59795e-66	0.949153	0.000410061	0.0504372
rs76212893	4	74743324	4q13.3	rs74544699	CXCL1	intergenic	1.075	6	4.76659e-14	74735110	74736959	7.4159e-63	3.59795e-66	0.949153	0.000410061	0.0504372
rs10518117	4	74750051	4q13.3	rs74544699	CXCL1	intergenic	3.735	6	8.30069e-13	74735110	74736959	7.4159e-63	3.59795e-66	0.949153	0.000410061	0.0504372
rs1511815	4	74751431	4q13.3	rs74544699	CXCL1	intergenic	0.067	NA	5.76155e-12	74735110	74736959	7.4159e-63	3.59795e-66	0.949153	0.000410061	0.0504372
rs77302034	4	74752882	4q13.3	rs74544699	CXCL1	intergenic	1.716	7	2.02142e-12	74735110	74736959	7.4159e-63	3.59795e-66	0.949153	0.000410061	0.0504372
rs12108606	4	74753881	4q13.3	rs74544699	CXCL1	intergenic	4.461	7	1.14771e-11	74735110	74736959	7.4159e-63	3.59795e-66	0.949153	0.000410061	0.0504372
rs74637775	4	74755056	4q13.3	rs74544699	CXCL1	intergenic	0.501	7	1.13736e-11	74735110	74736959	7.4159e-63	3.59795e-66	0.949153	0.000410061	0.0504372
rs16845091	4	74758801	4q13.3	rs74544699	CXCL1	intergenic	2.152	5	4.96217e-12	74735110	74736959	7.4159e-63	3.59795e-66	0.949153	0.000410061	0.0504372
rs16850160	4	74758993	4q13.3	rs74544699	CXCL1	intergenic	0.399	7	3.91582e-12	74735110	74736959	7.4159e-63	3.59795e-66	0.949153	0.000410061	0.0504372
rs16850178	4	74761528	4q13.3	rs74544699	CXCL1	intergenic	2.688	5	1.13785e-11	74735110	74736959	7.4159e-63	3.59795e-66	0.949153	0.000410061	0.0504372
rs2367427	4	74762793	4q13.3	rs74544699	CXCL1	intergenic	3.272	7	8.40647e-12	74735110	74736959	7.4159e-63	3.59795e-66	0.949153	0.000410061	0.0504372
rs58463118	4	74765468	4q13.3	rs74544699	CXCL1	intergenic	2.456	4	1.46414e-11	74735110	74736959	7.4159e-63	3.59795e-66	0.949153	0.000410061	0.0504372
rs60775930	4	74765926	4q13.3	rs74544699	CXCL1	intergenic	4.213	5	3.01619e-11	74735110	74736959	7.4159e-63	3.59795e-66	0.949153	0.000410061	0.0504372
rs2367429	4	74766423	4q13.3	rs72855280	CXCL1	intergenic	1.366	7	4.11275e-09	74735110	74736959	7.4159e-63	3.59795e-66	0.949153	0.000410061	0.0504372
rs2367430	4	74766528	4q13.3	rs72855280	CXCL1	intergenic	0.576	7	2.49662e-09	74735110	74736959	7.4159e-63	3.59795e-66	0.949153	0.000410061	0.0504372
rs671253	4	74767116	4q13.3	rs74544699	CXCL1	intergenic	4.4	NA	1.19924e-08	74735110	74736959	7.4159e-63	3.59795e-66	0.949153	0.000410061	0.0504372
rs529312	4	74767982	4q13.3	rs74544699	CXCL1	intergenic	5.655	2b	4.91482e-09	74735110	74736959	7.4159e-63	3.59795e-66	0.949153	0.000410061	0.0504372
rs77149208	4	74768731	4q13.3	rs74544699	CXCL1	intergenic	0.042	5	4.93974e-10	74735110	74736959	7.4159e-63	3.59795e-66	0.949153	0.000410061	0.0504372
rs499141	4	74768970	4q13.3	rs74544699	CXCL1	intergenic	4.552	NA	6.586e-09	74735110	74736959	7.4159e-63	3.59795e-66	0.949153	0.000410061	0.0504372
rs353042	4	74770221	4q13.3	rs74544699	CXCL1	intergenic	3.435	3a	4.90321e-08	74735110	74736959	7.4159e-63	3.59795e-66	0.949153	0.000410061	0.0504372
rs353039	4	74771139	4q13.3	rs74544699	HNRNPA1P55	intergenic	0.74	5	1.04728e-08	74735110	74736959	7.4159e-63	3.59795e-66	0.949153	0.000410061	0.0504372
rs353034	4	74773643	4q13.3	rs74544699	HNRNPA1P55	intergenic	1.295	NA	1.67116e-08	74735110	74736959	7.4159e-63	3.59795e-66	0.949153	0.000410061	0.0504372
rs10007249	4	74775629	4q13.3	rs74544699	HNRNPA1P55	intergenic	0.558	6	4.9528e-08	74735110	74736959	7.4159e-63	3.59795e-66	0.949153	0.000410061	0.0504372
rs629315	4	74776218	4q13.3	rs74544699	HNRNPA1P55	intergenic	0.318	6	1.8581e-08	74735110	74736959	7.4159e-63	3.59795e-66	0.949153	0.000410061	0.0504372
rs585778	4	74779005	4q13.3	rs74544699	HNRNPA1P55	intergenic	0.634	7	3.44836e-08	74735110	74736959	7.4159e-63	3.59795e-66	0.949153	0.000410061	0.0504372
rs79981249	4	74784164	4q13.3	rs74544699	HNRNPA1P55	intergenic	7.015	7	1.44e-09	74735110	74736959	7.4159e-63	3.59795e-66	0.949153	0.000410061	0.0504372
rs57274239	4	74789027	4q13.3	rs74544699	HNRNPA1P55	intergenic	0.509	4	2.81176e-09	74735110	74736959	7.4159e-63	3.59795e-66	0.949153	0.000410061	0.0504372
rs78267059	4	74798010	4q13.3	rs74544699	HNRNPA1P55	intergenic	2.866	7	1.79731e-09	74735110	74736959	7.4159e-63	3.59795e-66	0.949153	0.000410061	0.0504372
rs76595330	4	74801272	4q13.3	rs74544699	HNRNPA1P55	intergenic	4.348	6	1.09555e-09	74735110	74736959	7.4159e-63	3.59795e-66	0.949153	0.000410061	0.0504372
rs116254820	4	74804444	4q13.3	rs74544699	HNRNPA1P55	ncRNA_exonic	9.971	7	3.78444e-09	74735110	74736959	7.4159e-63	3.59795e-66	0.949153	0.000410061	0.0504372
rs938094	4	74805942	4q13.3	rs74544699	HNRNPA1P55	upstream	7.508	7	1.08081e-08	74735110	74736959	7.4159e-63	3.59795e-66	0.949153	0.000410061	0.0504372
rs7666671	4	74807007	4q13.3	rs74544699	HNRNPA1P55	intergenic	1.127	6	4.28733e-09	74735110	74736959	7.4159e-63	3.59795e-66	0.949153	0.000410061	0.0504372
rs75158139	4	74814266	4q13.3	rs72855280	CXCL1P	intergenic	2.411	4	2.05551e-08	74735110	74736959	7.4159e-63	3.59795e-66	0.949153	0.000410061	0.0504372
rs115959394	4	74817524	4q13.3	rs72855280	CXCL1P	intergenic	1.772	5	1.98968e-08	74735110	74736959	7.4159e-63	3.59795e-66	0.949153	0.000410061	0.0504372
rs151307926	4	74819806	4q13.3	rs72855280	CXCL1P	intergenic	0.479	6	2.2018e-08	74735110	74736959	7.4159e-63	3.59795e-66	0.949153	0.000410061	0.0504372
rs2195543	4	74829552	4q13.3	rs72855280	PF4	intergenic	2.533	NA	4.80244e-08	74846794	74847841	3.78857e-42	1.32579e-46	0.97501	9.13873e-06	0.0249812
rs4082827	4	74831180	4q13.3	rs72855280	PF4	intergenic	9.503	NA	4.51019e-08	74846794	74847841	3.78857e-42	1.32579e-46	0.97501	9.13873e-06	0.0249812
rs72855280	4	74835131	4q13.3	rs72855280	PF4	intergenic	8.769	6	1.20663e-09	74846794	74847841	3.78857e-42	1.32579e-46	0.97501	9.13873e-06	0.0249812
rs1435520	4	74845417	4q13.3	rs16850360	PF4	intergenic	6.939	5	4.68668e-09	74846794	74847841	3.78857e-42	1.32579e-46	0.97501	9.13873e-06	0.0249812
rs11574450	4	74847111	4q13.3	rs16850360	PF4	intronic	3.643	NA	1.36907e-08	74846794	74847841	3.78857e-42	1.32579e-46	0.97501	9.13873e-06	0.0249812
rs3756074	4	74848065	4q13.3	rs16850360	PF4	upstream	0.201	4	2.24034e-09	74846794	74847841	3.78857e-42	1.32579e-46	0.97501	9.13873e-06	0.0249812
rs16850360	4	74872445	4q13.3	rs16850360	RN7SL218P	intergenic	0.018	6	4.4623e-11	74861359	74864496	0.380873	3.73715e-05	0.610463	5.13238e-05	0.00857523
rs10462335	5	88088204	5q14.3	rs17558396	MEF2C	intronic	0.248	3a	6.99317e-10	88013975	88199922	0.00615236	0.0644105	0.00690785	0.0714688	0.85106
rs17558396	5	88102281	5q14.3	rs17558396	MEF2C	intronic	0.398	3a	5.3831e-10	88013975	88199922	0.00615236	0.0644105	0.00690785	0.0714688	0.85106
rs700592	5	88102863	5q14.3	rs700590	MEF2C	intronic	7.829	NA	1.63403e-09	88013975	88199922	0.00615236	0.0644105	0.00690785	0.0714688	0.85106
rs700591	5	88105614	5q14.3	rs700590	MEF2C	intronic	0.086	NA	1.574e-09	88013975	88199922	0.00615236	0.0644105	0.00690785	0.0714688	0.85106
rs700590	5	88106258	5q14.3	rs700590	MEF2C	intronic	4.757	NA	1.30542e-09	88013975	88199922	0.00615236	0.0644105	0.00690785	0.0714688	0.85106
rs62380364	5	88107337	5q14.3	rs17558396	MEF2C	intronic	4.786	5	2.33613e-09	88013975	88199922	0.00615236	0.0644105	0.00690785	0.0714688	0.85106
rs2362108	5	88147771	5q14.3	rs17558396	MEF2C	intronic	1.369	6	7.94947e-09	88013975	88199922	0.00615236	0.0644105	0.00690785	0.0714688	0.85106
rs2362109	5	88148041	5q14.3	rs17558396	MEF2C	intronic	0.241	6	6.75448e-09	88013975	88199922	0.00615236	0.0644105	0.00690785	0.0714688	0.85106
rs17487515	5	88149291	5q14.3	rs17558396	MEF2C	intronic	10.12	6	7.01428e-09	88013975	88199922	0.00615236	0.0644105	0.00690785	0.0714688	0.85106
rs17559709	5	88149326	5q14.3	rs17558396	MEF2C	intronic	9.613	6	6.4882e-09	88013975	88199922	0.00615236	0.0644105	0.00690785	0.0714688	0.85106
rs4145738	5	88150289	5q14.3	rs17558396	MEF2C	intronic	2.42	7	7.5048e-09	88013975	88199922	0.00615236	0.0644105	0.00690785	0.0714688	0.85106
rs57055575	5	88150992	5q14.3	rs17558396	MEF2C	intronic	4.629	5	6.24838e-09	88013975	88199922	0.00615236	0.0644105	0.00690785	0.0714688	0.85106
rs4373304	5	88152202	5q14.3	rs17558396	MEF2C	intronic	3.525	6	6.77279e-09	88013975	88199922	0.00615236	0.0644105	0.00690785	0.0714688	0.85106
rs11749060	5	88152574	5q14.3	rs17558396	MEF2C	intronic	1.474	5	6.27945e-09	88013975	88199922	0.00615236	0.0644105	0.00690785	0.0714688	0.85106
rs55740951	5	88153874	5q14.3	rs17558396	MEF2C	intronic	2.191	7	6.75448e-09	88013975	88199922	0.00615236	0.0644105	0.00690785	0.0714688	0.85106
rs4518438	5	88157552	5q14.3	rs17558396	MEF2C	intronic	9.083	7	3.54886e-08	88013975	88199922	0.00615236	0.0644105	0.00690785	0.0714688	0.85106
rs7730255	5	88158146	5q14.3	rs17558396	MEF2C	intronic	0.107	5	4.86593e-09	88013975	88199922	0.00615236	0.0644105	0.00690785	0.0714688	0.85106
rs56947091	5	88160354	5q14.3	rs17558396	MEF2C	intronic	2.325	6	2.73617e-08	88013975	88199922	0.00615236	0.0644105	0.00690785	0.0714688	0.85106
rs61104616	5	88163771	5q14.3	rs17558396	MEF2C	intronic	17.99	5	4.54948e-08	88013975	88199922	0.00615236	0.0644105	0.00690785	0.0714688	0.85106
rs188581	5	88175251	5q14.3	rs17558396	MEF2C	intronic	5.162	5	1.77522e-08	88013975	88199922	0.00615236	0.0644105	0.00690785	0.0714688	0.85106
rs4958434	5	150402570	5q33.1	rs11748041	GPX3	intronic	8.065	4	4.07643e-08	150400124	150408554	0.000966038	0.871883	5.0689e-06	0.00445216	0.122694
rs4958873	5	150404096	5q33.1	rs11748041	GPX3	intronic	5.568	4	2.89734e-08	150400124	150408554	0.000966038	0.871883	5.0689e-06	0.00445216	0.122694
rs8177447	5	150407456	5q33.1	rs11748041	GPX3	exonic	7.492	4	3.38652e-08	150400124	150408554	0.000966038	0.871883	5.0689e-06	0.00445216	0.122694
rs11748041	5	150414960	5q33.1	rs11748041	TNIP1	intronic	0.948	5	2.47448e-08	150409506	150473138	0.000164732	0.924812	1.87554e-06	0.0104648	0.064557
rs7727250	5	150415651	5q33.1	rs11748041	TNIP1	intronic	6.111	5	3.31106e-08	150409506	150473138	0.000164732	0.924812	1.87554e-06	0.0104648	0.064557
rs4879515	9	27482235	9p21.2	rs4879515	MOB3B	intronic	15.78	5	3.84415e-08	27325207	27529779	7.39674e-35	0.955434	1.72834e-36	0.0223027	0.0222635
rs895022	9	27484371	9p21.2	rs2453565	MOB3B	intronic	1.315	5	2.24007e-09	27325207	27529779	7.39674e-35	0.955434	1.72834e-36	0.0223027	0.0222635
rs895021	9	27484911	9p21.2	rs2453565	MOB3B	intronic	2.005	NA	2.88149e-09	27325207	27529779	7.39674e-35	0.955434	1.72834e-36	0.0223027	0.0222635
rs12115670	9	27486172	9p21.2	rs2453565	MOB3B	intronic	4.66	6	1.13829e-08	27325207	27529779	7.39674e-35	0.955434	1.72834e-36	0.0223027	0.0222635
rs7041409	9	27487221	9p21.2	rs2453565	MOB3B	intronic	9.436	3a	1.50078e-09	27325207	27529779	7.39674e-35	0.955434	1.72834e-36	0.0223027	0.0222635
rs17779457	9	27488092	9p21.2	rs2453565	MOB3B	intronic	4.639	1f	1.10302e-08	27325207	27529779	7.39674e-35	0.955434	1.72834e-36	0.0223027	0.0222635
rs868857	9	27488906	9p21.2	rs2453565	MOB3B	intronic	4.568	7	4.07992e-08	27325207	27529779	7.39674e-35	0.955434	1.72834e-36	0.0223027	0.0222635
rs868856	9	27489251	9p21.2	rs2453565	MOB3B	intronic	16.3	4	8.3293e-09	27325207	27529779	7.39674e-35	0.955434	1.72834e-36	0.0223027	0.0222635
rs17769038	9	27489693	9p21.2	rs2453565	MOB3B	intronic	5.536	3a	9.74866e-10	27325207	27529779	7.39674e-35	0.955434	1.72834e-36	0.0223027	0.0222635
rs2492815	9	27490296	9p21.2	rs2453565	MOB3B	intronic	1.808	NA	1.79766e-08	27325207	27529779	7.39674e-35	0.955434	1.72834e-36	0.0223027	0.0222635
rs10435784	9	27490332	9p21.2	rs2453565	MOB3B	intronic	1.689	7	5.11832e-09	27325207	27529779	7.39674e-35	0.955434	1.72834e-36	0.0223027	0.0222635
rs7046653	9	27490967	9p21.2	rs2453565	MOB3B	intronic	2.407	7	1.44858e-09	27325207	27529779	7.39674e-35	0.955434	1.72834e-36	0.0223027	0.0222635
rs9969707	9	27491104	9p21.2	rs2453565	MOB3B	intronic	5.989	6	9.72802e-10	27325207	27529779	7.39674e-35	0.955434	1.72834e-36	0.0223027	0.0222635
rs7019351	9	27491262	9p21.2	rs2453565	MOB3B	intronic	8.039	4	3.65221e-09	27325207	27529779	7.39674e-35	0.955434	1.72834e-36	0.0223027	0.0222635
rs7019847	9	27491397	9p21.2	rs2453565	MOB3B	intronic	2.187	4	2.29497e-09	27325207	27529779	7.39674e-35	0.955434	1.72834e-36	0.0223027	0.0222635
rs2764332	9	27492522	9p21.2	rs2453565	MOB3B	intronic	8.961	6	1.05699e-08	27325207	27529779	7.39674e-35	0.955434	1.72834e-36	0.0223027	0.0222635
rs2764331	9	27492934	9p21.2	rs2453565	MOB3B	intronic	7.084	NA	1.314e-08	27325207	27529779	7.39674e-35	0.955434	1.72834e-36	0.0223027	0.0222635
rs9969832	9	27493063	9p21.2	rs2453565	MOB3B	intronic	7.596	5	8.08798e-10	27325207	27529779	7.39674e-35	0.955434	1.72834e-36	0.0223027	0.0222635
rs2589049	9	27493409	9p21.2	rs2453565	MOB3B	intronic	2.796	NA	1.85454e-08	27325207	27529779	7.39674e-35	0.955434	1.72834e-36	0.0223027	0.0222635
rs10812603	9	27494674	9p21.2	rs2453565	MOB3B	intronic	1.726	7	2.39247e-09	27325207	27529779	7.39674e-35	0.955434	1.72834e-36	0.0223027	0.0222635
rs7864595	9	27495572	9p21.2	rs2453565	MOB3B	intronic	1.589	5	2.02267e-09	27325207	27529779	7.39674e-35	0.955434	1.72834e-36	0.0223027	0.0222635
rs10812604	9	27496661	9p21.2	rs2453565	MOB3B	intronic	12.22	6	4.28037e-10	27325207	27529779	7.39674e-35	0.955434	1.72834e-36	0.0223027	0.0222635
rs2440620	9	27497621	9p21.2	rs2453565	MOB3B	intronic	1.118	NA	4.60848e-09	27325207	27529779	7.39674e-35	0.955434	1.72834e-36	0.0223027	0.0222635
rs10967965	9	27497988	9p21.2	rs2453565	MOB3B	intronic	17.2	1f	1.27572e-09	27325207	27529779	7.39674e-35	0.955434	1.72834e-36	0.0223027	0.0222635
rs2492812	9	27499627	9p21.2	rs2453565	MOB3B	intronic	8.572	NA	3.97734e-09	27325207	27529779	7.39674e-35	0.955434	1.72834e-36	0.0223027	0.0222635
rs2492823	9	27502005	9p21.2	rs2453565	MOB3B	intronic	3.709	NA	2.60641e-09	27325207	27529779	7.39674e-35	0.955434	1.72834e-36	0.0223027	0.0222635
rs2492821	9	27503506	9p21.2	rs2453565	MOB3B	intronic	3.18	7	9.84353e-09	27325207	27529779	7.39674e-35	0.955434	1.72834e-36	0.0223027	0.0222635
rs2492818	9	27505639	9p21.2	rs2453565	MOB3B	intronic	3.1	NA	6.96874e-09	27325207	27529779	7.39674e-35	0.955434	1.72834e-36	0.0223027	0.0222635
rs10738774	9	27506051	9p21.2	rs2453565	MOB3B	intronic	5.181	5	4.06396e-10	27325207	27529779	7.39674e-35	0.955434	1.72834e-36	0.0223027	0.0222635
rs1319236	9	27507209	9p21.2	rs2453565	MOB3B	intronic	4.325	5	4.00353e-10	27325207	27529779	7.39674e-35	0.955434	1.72834e-36	0.0223027	0.0222635
rs2246591	9	27507804	9p21.2	rs2453565	MOB3B	intronic	0.565	7	2.06925e-09	27325207	27529779	7.39674e-35	0.955434	1.72834e-36	0.0223027	0.0222635
rs7036117	9	27507836	9p21.2	rs2453565	MOB3B	intronic	0.106	6	5.99178e-10	27325207	27529779	7.39674e-35	0.955434	1.72834e-36	0.0223027	0.0222635
rs1537712	9	27508489	9p21.2	rs2453565	MOB3B	intronic	6.621	NA	1.24546e-09	27325207	27529779	7.39674e-35	0.955434	1.72834e-36	0.0223027	0.0222635
rs12554036	9	27509211	9p21.2	rs2453565	MOB3B	intronic	0.525	7	1.68086e-10	27325207	27529779	7.39674e-35	0.955434	1.72834e-36	0.0223027	0.0222635
rs9408120	9	27509635	9p21.2	rs2453565	MOB3B	intronic	4.637	6	5.57793e-09	27325207	27529779	7.39674e-35	0.955434	1.72834e-36	0.0223027	0.0222635
rs2477520	9	27509870	9p21.2	rs2453565	MOB3B	intronic	1.972	7	4.58669e-09	27325207	27529779	7.39674e-35	0.955434	1.72834e-36	0.0223027	0.0222635
rs2477521	9	27509945	9p21.2	rs2453565	MOB3B	intronic	2.156	5	4.18221e-09	27325207	27529779	7.39674e-35	0.955434	1.72834e-36	0.0223027	0.0222635
rs2492817	9	27511151	9p21.2	rs2453565	MOB3B	intronic	0.229	NA	3.62167e-09	27325207	27529779	7.39674e-35	0.955434	1.72834e-36	0.0223027	0.0222635
rs2484314	9	27511284	9p21.2	rs2453565	MOB3B	intronic	8.872	6	4.26532e-09	27325207	27529779	7.39674e-35	0.955434	1.72834e-36	0.0223027	0.0222635
rs2814709	9	27513298	9p21.2	rs2453565	MOB3B	intronic	2.121	NA	3.67014e-09	27325207	27529779	7.39674e-35	0.955434	1.72834e-36	0.0223027	0.0222635
rs2814708	9	27513716	9p21.2	rs2453565	MOB3B	intronic	0.603	7	2.46386e-09	27325207	27529779	7.39674e-35	0.955434	1.72834e-36	0.0223027	0.0222635
rs10738775	9	27514318	9p21.2	rs2453565	MOB3B	intronic	6.203	7	1.87709e-10	27325207	27529779	7.39674e-35	0.955434	1.72834e-36	0.0223027	0.0222635
rs2440619	9	27514323	9p21.2	rs2453565	MOB3B	intronic	1.022	NA	5.91426e-09	27325207	27529779	7.39674e-35	0.955434	1.72834e-36	0.0223027	0.0222635
rs2783009	9	27514584	9p21.2	rs2453565	MOB3B	intronic	6.668	6	4.4078e-09	27325207	27529779	7.39674e-35	0.955434	1.72834e-36	0.0223027	0.0222635
rs4609281	9	27514962	9p21.2	rs2453565	MOB3B	intronic	3.545	7	3.79507e-10	27325207	27529779	7.39674e-35	0.955434	1.72834e-36	0.0223027	0.0222635
rs814030	9	27515194	9p21.2	rs2453565	MOB3B	intronic	0.824	6	4.77738e-09	27325207	27529779	7.39674e-35	0.955434	1.72834e-36	0.0223027	0.0222635
rs774355	9	27515794	9p21.2	rs2453565	MOB3B	intronic	5.822	NA	2.25773e-09	27325207	27529779	7.39674e-35	0.955434	1.72834e-36	0.0223027	0.0222635
rs774354	9	27515967	9p21.2	rs2453565	MOB3B	intronic	5.591	NA	2.72385e-09	27325207	27529779	7.39674e-35	0.955434	1.72834e-36	0.0223027	0.0222635
rs774353	9	27516436	9p21.2	rs2453565	MOB3B	intronic	2.117	6	1.92096e-09	27325207	27529779	7.39674e-35	0.955434	1.72834e-36	0.0223027	0.0222635
rs774352	9	27516590	9p21.2	rs2453565	MOB3B	intronic	1.501	6	1.49834e-09	27325207	27529779	7.39674e-35	0.955434	1.72834e-36	0.0223027	0.0222635
rs774351	9	27516640	9p21.2	rs2453565	MOB3B	intronic	0.466	NA	2.75931e-09	27325207	27529779	7.39674e-35	0.955434	1.72834e-36	0.0223027	0.0222635
rs3849938	9	27517635	9p21.2	rs2453565	MOB3B	intronic	0.597	7	2.91018e-10	27325207	27529779	7.39674e-35	0.955434	1.72834e-36	0.0223027	0.0222635
rs700795	9	27520508	9p21.2	rs2453565	MOB3B	intronic	16.7	NA	1.65584e-08	27325207	27529779	7.39674e-35	0.955434	1.72834e-36	0.0223027	0.0222635
rs774349	9	27521908	9p21.2	rs2453565	MOB3B	intronic	0.131	7	3.81719e-08	27325207	27529779	7.39674e-35	0.955434	1.72834e-36	0.0223027	0.0222635
rs10967972	9	27523082	9p21.2	rs2453565	MOB3B	intronic	0.243	7	3.72243e-09	27325207	27529779	7.39674e-35	0.955434	1.72834e-36	0.0223027	0.0222635
rs3849939	9	27525221	9p21.2	rs2453565	MOB3B:IFNK	intronic	3.454	5	9.07912e-10	27325207	27529779	7.39674e-35	0.955434	1.72834e-36	0.0223027	0.0222635
rs2484316	9	27527173	9p21.2	rs2453565	MOB3B	intronic	1.686	7	3.87073e-08	27325207	27529779	7.39674e-35	0.955434	1.72834e-36	0.0223027	0.0222635
rs2814707	9	27536397	9p21.2	rs2453565	MOB3B	intergenic	10.04	NA	5.97161e-09	27325207	27529779	7.39674e-35	0.955434	1.72834e-36	0.0223027	0.0222635
rs2477523	9	27536894	9p21.2	rs2453565	MOB3B	intergenic	0.303	6	4.07429e-09	27325207	27529779	7.39674e-35	0.955434	1.72834e-36	0.0223027	0.0222635
rs3849941	9	27538948	9p21.2	rs2453565	C9orf72	intergenic	0.424	4	3.35267e-11	27546544	27573864	1.24175e-36	0.974921	2.96619e-39	0.00230604	0.0227726
rs3849942	9	27543281	9p21.2	rs2453565	C9orf72	intergenic	5.483	6	3.54713e-10	27546544	27573864	1.24175e-36	0.974921	2.96619e-39	0.00230604	0.0227726
rs3849943	9	27543382	9p21.2	rs2453565	C9orf72	intergenic	1.292	NA	4.74162e-10	27546544	27573864	1.24175e-36	0.974921	2.96619e-39	0.00230604	0.0227726
rs812858	9	27545467	9p21.2	rs2453565	C9orf72	intergenic	8.084	5	7.86085e-12	27546544	27573864	1.24175e-36	0.974921	2.96619e-39	0.00230604	0.0227726
rs700791	9	27545960	9p21.2	rs2453565	C9orf72	downstream	0.234	6	1.48106e-11	27546544	27573864	1.24175e-36	0.974921	2.96619e-39	0.00230604	0.0227726
rs2453565	9	27551040	9p21.2	rs2453565	C9orf72	intronic	9.98	6	5.27577e-12	27546544	27573864	1.24175e-36	0.974921	2.96619e-39	0.00230604	0.0227726
rs700828	9	27557537	9p21.2	rs2453565	C9orf72	intronic	4.444	6	2.68915e-08	27546544	27573864	1.24175e-36	0.974921	2.96619e-39	0.00230604	0.0227726
rs774356	9	27559721	9p21.2	rs2453565	C9orf72	intronic	5.526	6	3.76754e-08	27546544	27573864	1.24175e-36	0.974921	2.96619e-39	0.00230604	0.0227726
rs774357	9	27559835	9p21.2	rs2453565	C9orf72	intronic	2.654	7	2.33022e-09	27546544	27573864	1.24175e-36	0.974921	2.96619e-39	0.00230604	0.0227726
rs774359	9	27561049	9p21.2	rs2453565	C9orf72	UTR3	1.404	5	8.95513e-09	27546544	27573864	1.24175e-36	0.974921	2.96619e-39	0.00230604	0.0227726
rs2453554	9	27561800	9p21.2	rs2453565	C9orf72	intronic	1.596	5	1.27192e-09	27546544	27573864	1.24175e-36	0.974921	2.96619e-39	0.00230604	0.0227726
rs2484319	9	27563755	9p21.2	rs2453565	C9orf72	intronic	1.647	6	6.79497e-10	27546544	27573864	1.24175e-36	0.974921	2.96619e-39	0.00230604	0.0227726
rs2453555	9	27563868	9p21.2	rs2453565	C9orf72	intronic	4.356	5	3.62398e-10	27546544	27573864	1.24175e-36	0.974921	2.96619e-39	0.00230604	0.0227726
rs3849945	9	27568817	9p21.2	rs2453565	C9orf72	intronic	1.008	6	1.12127e-10	27546544	27573864	1.24175e-36	0.974921	2.96619e-39	0.00230604	0.0227726
rs11789520	9	27574515	9p21.2	rs2453565	C9orf72	upstream	0.481	4	7.41248e-10	27546544	27573864	1.24175e-36	0.974921	2.96619e-39	0.00230604	0.0227726
