# Supplementary material for: Genome-wide association analysis reveals potential genetic correlation and causality between circulating inflammatory proteins and amyotrophic lateral sclerosis
Source: Aging (Albany NY). 2024 May 30;16(11):9470–84. doi: 10.18632/aging.205878 (PMC11210256; doi:10.18632/aging.205878)
Supplement: Supplementary Table 6 [file aging-16-205878-s006.xls]

## Sheet: content
content	Supplementary table
Data Sources	S1
Genetic correlation genetic overlap and genetic causation results between circulating inflammatory proteins and ALS	S2
Shared sites between C-C motif chemokine 28 levels and ALS	S3
Shared sites between Interleukin-18 levels and ALS	S4
Shared sites between C-X-C motif chemokine 1 levels and ALS	S5
Shared sites between Leukemia inhibitory factor receptor levels and ALS	S6
Results of Forward Mendelian Randomization Analysis between 91 inflammatory proteins and ALS (snp p<5e-8)	S7
Exclude rs112665079 and reperform the Mendelian randomization analysis	S8
Results of Reverse Mendelian Randomization Analysis between 91 inflammatory proteins and ALS	S9

## Sheet: Supplementary Table 6
Supplementary Table 6. Shared sites between leukemia inhibitory factor receptor levels and ALS.
rsID	Chr	BP	Region	LeadSNPs	NearestGene	Func	CADD	RDB	P.PLACO	start	end	PP.H0.abf	PP.H1.abf	PP.H2.abf	PP.H3.abf	PP.H4.abf
rs10967965	9	27497988	9p21.2	rs10967965	MOB3B	intronic	17.2	1f	3.24e-10	27325207	27529779	7.30445e-35	0.943513	3.46811e-36	0.0447857	0.0117009
rs11244034	9	136080272	9q34.2	rs10793960	OBP2B	downstream	0.113	5	7.25e-10	136080664	136084630	7.56175e-14	8.30848e-17	0.903414	0.000896938	0.0956889
rs10901246	9	136080485	9q34.2	rs10793958	OBP2B	downstream	0.004	5	1.25e-09	136080664	136084630	7.56175e-14	8.30848e-17	0.903414	0.000896938	0.0956889
rs10901247	9	136080487	9q34.2	rs10793958	OBP2B	downstream	3.351	5	1.27e-09	136080664	136084630	7.56175e-14	8.30848e-17	0.903414	0.000896938	0.0956889
rs1052517	9	136080746	9q34.2	rs10793960	OBP2B	UTR3	0.355	5	7.59e-10	136080664	136084630	7.56175e-14	8.30848e-17	0.903414	0.000896938	0.0956889
rs11244035	9	136081319	9q34.2	rs11244035	OBP2B	exonic	0.018	5	1.12e-09	136080664	136084630	7.56175e-14	8.30848e-17	0.903414	0.000896938	0.0956889
rs10793957	9	136087931	9q34.2	rs10793960	OBP2B	intergenic	3.094	5	3.75e-09	136080664	136084630	7.56175e-14	8.30848e-17	0.903414	0.000896938	0.0956889
rs10793958	9	136088047	9q34.2	rs10793958	OBP2B	intergenic	1.081	6	3.57e-10	136080664	136084630	7.56175e-14	8.30848e-17	0.903414	0.000896938	0.0956889
rs10736860	9	136091809	9q34.2	rs10793960	OBP2B	intergenic	7.603	5	2.38e-09	136080664	136084630	7.56175e-14	8.30848e-17	0.903414	0.000896938	0.0956889
rs10793959	9	136093199	9q34.2	rs10793960	LCN1P1	intergenic	1.534	5	2.09e-09	136080664	136084630	7.56175e-14	8.30848e-17	0.903414	0.000896938	0.0956889
rs10901248	9	136093615	9q34.2	rs10793958	LCN1P1	intergenic	1.417	5	9.98e-09	136080664	136084630	7.56175e-14	8.30848e-17	0.903414	0.000896938	0.0956889
rs11244038	9	136095770	9q34.2	rs11244049	LCN1P1	intergenic	1.486	5	4.62e-10	136080664	136084630	7.56175e-14	8.30848e-17	0.903414	0.000896938	0.0956889
rs10793960	9	136105703	9q34.2	rs10793960	LCN1P1	intergenic	0.22	4	2.27e-08	136080664	136084630	7.56175e-14	8.30848e-17	0.903414	0.000896938	0.0956889
rs10793961	9	136109153	9q34.2	rs10793958	LCN1P1	intergenic	1.27	5	2.01e-09	136080664	136084630	7.56175e-14	8.30848e-17	0.903414	0.000896938	0.0956889
rs11244041	9	136109279	9q34.2	rs10793958	LCN1P1	intergenic	0.119	5	1.26e-09	136080664	136084630	7.56175e-14	8.30848e-17	0.903414	0.000896938	0.0956889
rs11244049	9	136123092	9q34.2	rs11244049	ABO:RP11-430N14.4	intergenic	6.021	5	4.89e-11	136080664	136084630	7.56175e-14	8.30848e-17	0.903414	0.000896938	0.0956889
rs10901252	9	136128000	9q34.2	rs11244049	ABO:RP11-430N14.4	ncRNA_exonic	0.195	4	1.1e-10	136080664	136084630	7.56175e-14	8.30848e-17	0.903414	0.000896938	0.0956889
rs10793962	9	136129115	9q34.2	rs11244049	ABO:RP11-430N14.4	ncRNA_exonic	2.336	6	8.66e-11	136080664	136084630	7.56175e-14	8.30848e-17	0.903414	0.000896938	0.0956889
rs1137827	9	136129715	9q34.2	rs11244049	ABO:RP11-430N14.4	ncRNA_exonic	4.386	NA	1.15e-10	136080664	136084630	7.56175e-14	8.30848e-17	0.903414	0.000896938	0.0956889
rs11244061	9	136153981	9q34.2	rs11244061	ABO	intergenic	0.868	4	1.68e-12	136080664	136084630	7.56175e-14	8.30848e-17	0.903414	0.000896938	0.0956889
rs11244079	9	136184526	9q34.2	rs11244049	LCN1P2	upstream	5.95	5	1.2e-09	136080664	136084630	7.56175e-14	8.30848e-17	0.903414	0.000896938	0.0956889
