# Supplementary material for: Genome-wide association analysis reveals potential genetic correlation and causality between circulating inflammatory proteins and amyotrophic lateral sclerosis
Source: Aging (Albany NY). 2024 May 30;16(11):9470–84. doi: 10.18632/aging.205878 (PMC11210256; doi:10.18632/aging.205878)
Supplement: Supplementary Table 7 [file aging-16-205878-s007.xls]

## Sheet: content
content	Supplementary table
Data Sources	S1
Genetic correlation genetic overlap and genetic causation results between circulating inflammatory proteins and ALS	S2
Shared sites between C-C motif chemokine 28 levels and ALS	S3
Shared sites between Interleukin-18 levels and ALS	S4
Shared sites between C-X-C motif chemokine 1 levels and ALS	S5
Shared sites between Leukemia inhibitory factor receptor levels and ALS	S6
Results of Forward Mendelian Randomization Analysis between 91 inflammatory proteins and ALS (snp p<5e-8)	S7
Exclude rs112665079 and reperform the Mendelian randomization analysis	S8
Results of Reverse Mendelian Randomization Analysis between 91 inflammatory proteins and ALS	S9

## Sheet: Supplementary Table 7
Supplementary Table 7. Results of forward Mendelian randomization analysis between 91 inflammatory proteins and ALS (snp p<5e-8).
Select snp p_value < 5e-8, clump_kb = 5000, clump_r2 = 0.01, leaving 73 of the 91 inflammatory proteins
	id.exposure	id.outcome	outcome	exposure	method	nsnp	b	se	pval	OR	lower	upper	Q	Q_df	Q_pval(MR Egger)	egger_intercept	pval(egger_intercept)	p mr_presso
1	beta-nerve growth factor levels	ebi-a-GCST90027164	Amyotrophic lateral sclerosis || id:ebi-a-GCST90027164	90274762	Inverse variance weighted	2	-0.0215228	0.102086	0.83302	0.978707	0.801226	1.1955	#N/A	#N/A	#N/A	NA	NA	#N/A
2	Sulfotransferase 1A1 levels	ebi-a-GCST90027164	Amyotrophic lateral sclerosis || id:ebi-a-GCST90027164	90274836	MR Egger	3	0.558437	0.20471	0.223686	1.74794	1.17024	2.61083	0.897672	1	0.343407	-0.0777205	0.263773	#N/A
3	Sulfotransferase 1A1 levels	ebi-a-GCST90027164	Amyotrophic lateral sclerosis || id:ebi-a-GCST90027164	90274836	Weighted median	3	0.114184	0.0488479	0.0194114	1.12096	1.01861	1.23359	0.897672	1	0.343407	-0.0777205	0.263773	#N/A
4	Sulfotransferase 1A1 levels	ebi-a-GCST90027164	Amyotrophic lateral sclerosis || id:ebi-a-GCST90027164	90274836	Inverse variance weighted	3	0.103565	0.0756442	0.170967	1.10912	0.956286	1.28637	0.897672	1	0.343407	-0.0777205	0.263773	#N/A
5	Sulfotransferase 1A1 levels	ebi-a-GCST90027164	Amyotrophic lateral sclerosis || id:ebi-a-GCST90027164	90274836	Simple mode	3	0.113903	0.0621989	0.208537	1.12064	0.992025	1.26594	0.897672	1	0.343407	-0.0777205	0.263773	#N/A
6	Sulfotransferase 1A1 levels	ebi-a-GCST90027164	Amyotrophic lateral sclerosis || id:ebi-a-GCST90027164	90274836	Weighted mode	3	0.119203	0.0480529	0.131259	1.1266	1.02533	1.23786	0.897672	1	0.343407	-0.0777205	0.263773	#N/A
7	Urokinase-type plasminogen activator levels	ebi-a-GCST90027164	Amyotrophic lateral sclerosis || id:ebi-a-GCST90027164	90274847	MR Egger	9	0.159207	0.151048	0.32689	1.17258	0.872104	1.57659	19.2405	7	0.00746652	-0.0177365	0.379491	0.012
8	Urokinase-type plasminogen activator levels	ebi-a-GCST90027164	Amyotrophic lateral sclerosis || id:ebi-a-GCST90027164	90274847	Weighted median	9	-0.0104386	0.0640089	0.870455	0.989616	0.872933	1.12189	19.2405	7	0.00746652	-0.0177365	0.379491	0.012
9	Urokinase-type plasminogen activator levels	ebi-a-GCST90027164	Amyotrophic lateral sclerosis || id:ebi-a-GCST90027164	90274847	Inverse variance weighted	9	0.0303102	0.06222	0.626155	1.03077	0.912433	1.16446	19.2405	7	0.00746652	-0.0177365	0.379491	0.012
10	Urokinase-type plasminogen activator levels	ebi-a-GCST90027164	Amyotrophic lateral sclerosis || id:ebi-a-GCST90027164	90274847	Simple mode	9	-0.0598393	0.13787	0.675737	0.941916	0.718877	1.23415	19.2405	7	0.00746652	-0.0177365	0.379491	0.012
11	Urokinase-type plasminogen activator levels	ebi-a-GCST90027164	Amyotrophic lateral sclerosis || id:ebi-a-GCST90027164	90274847	Weighted mode	9	0.170257	0.140399	0.259851	1.18561	0.900391	1.56118	19.2405	7	0.00746652	-0.0177365	0.379491	0.012
12	Adenosine Deaminase levels	ebi-a-GCST90027164	Amyotrophic lateral sclerosis || id:ebi-a-GCST90027164	90274759	MR Egger	4	0.0770051	0.0590483	0.322092	1.08005	0.962011	1.21257	5.65808	2	0.0590694	-0.00759728	0.806223	0.361
13	Adenosine Deaminase levels	ebi-a-GCST90027164	Amyotrophic lateral sclerosis || id:ebi-a-GCST90027164	90274759	Weighted median	4	0.0777484	0.0286423	0.00663836	1.08085	1.02184	1.14326	5.65808	2	0.0590694	-0.00759728	0.806223	0.361
14	Adenosine Deaminase levels	ebi-a-GCST90027164	Amyotrophic lateral sclerosis || id:ebi-a-GCST90027164	90274759	Inverse variance weighted	4	0.0646909	0.0326959	0.047865	1.06683	1.00061	1.13743	5.65808	2	0.0590694	-0.00759728	0.806223	0.361
15	Adenosine Deaminase levels	ebi-a-GCST90027164	Amyotrophic lateral sclerosis || id:ebi-a-GCST90027164	90274759	Simple mode	4	-0.0196699	0.0676371	0.790138	0.980522	0.858783	1.11952	5.65808	2	0.0590694	-0.00759728	0.806223	0.361
16	Adenosine Deaminase levels	ebi-a-GCST90027164	Amyotrophic lateral sclerosis || id:ebi-a-GCST90027164	90274759	Weighted mode	4	0.100125	0.0296104	0.0430461	1.10531	1.04299	1.17136	5.65808	2	0.0590694	-0.00759728	0.806223	0.361
17	Stem cell factor levels	ebi-a-GCST90027164	Amyotrophic lateral sclerosis || id:ebi-a-GCST90027164	90274833	MR Egger	12	-0.0512483	0.0660124	0.455516	0.950043	0.834742	1.08127	8.97142	10	0.534818	0.00481073	0.615687	0.603
18	Stem cell factor levels	ebi-a-GCST90027164	Amyotrophic lateral sclerosis || id:ebi-a-GCST90027164	90274833	Weighted median	12	-0.0205123	0.0419656	0.624991	0.979697	0.902339	1.06369	8.97142	10	0.534818	0.00481073	0.615687	0.603
19	Stem cell factor levels	ebi-a-GCST90027164	Amyotrophic lateral sclerosis || id:ebi-a-GCST90027164	90274833	Inverse variance weighted	12	-0.0210358	0.0309279	0.496404	0.979184	0.92159	1.04038	8.97142	10	0.534818	0.00481073	0.615687	0.603
20	Stem cell factor levels	ebi-a-GCST90027164	Amyotrophic lateral sclerosis || id:ebi-a-GCST90027164	90274833	Simple mode	12	-0.00583238	0.084523	0.946225	0.994185	0.842402	1.17331	8.97142	10	0.534818	0.00481073	0.615687	0.603
21	Stem cell factor levels	ebi-a-GCST90027164	Amyotrophic lateral sclerosis || id:ebi-a-GCST90027164	90274833	Weighted mode	12	-0.0253816	0.0480048	0.607496	0.974938	0.88739	1.07112	8.97142	10	0.534818	0.00481073	0.615687	0.603
22	Fibroblast growth factor 19 levels	ebi-a-GCST90027164	Amyotrophic lateral sclerosis || id:ebi-a-GCST90027164	90274787	MR Egger	3	0.0850676	0.189042	0.730806	1.08879	0.751672	1.5771	0.0698145	1	0.791607	-0.00281206	0.924938	#N/A
23	Fibroblast growth factor 19 levels	ebi-a-GCST90027164	Amyotrophic lateral sclerosis || id:ebi-a-GCST90027164	90274787	Weighted median	3	0.0675	0.0582236	0.246324	1.06983	0.954452	1.19916	0.0698145	1	0.791607	-0.00281206	0.924938	#N/A
24	Fibroblast growth factor 19 levels	ebi-a-GCST90027164	Amyotrophic lateral sclerosis || id:ebi-a-GCST90027164	90274787	Inverse variance weighted	3	0.0635704	0.0529455	0.229877	1.06563	0.960595	1.18216	0.0698145	1	0.791607	-0.00281206	0.924938	#N/A
25	Fibroblast growth factor 19 levels	ebi-a-GCST90027164	Amyotrophic lateral sclerosis || id:ebi-a-GCST90027164	90274787	Simple mode	3	0.0728508	0.0788972	0.453296	1.07557	0.921468	1.25544	0.0698145	1	0.791607	-0.00281206	0.924938	#N/A
26	Fibroblast growth factor 19 levels	ebi-a-GCST90027164	Amyotrophic lateral sclerosis || id:ebi-a-GCST90027164	90274787	Weighted mode	3	0.0720104	0.0616195	0.363	1.07467	0.952406	1.21262	0.0698145	1	0.791607	-0.00281206	0.924938	#N/A
27	C-C motif chemokine 19 levels	ebi-a-GCST90027164	Amyotrophic lateral sclerosis || id:ebi-a-GCST90027164	90274765	MR Egger	4	0.215509	0.104533	0.175369	1.24049	1.01068	1.52256	1.25782	2	0.533173	-0.0583608	0.156072	0.226
28	C-C motif chemokine 19 levels	ebi-a-GCST90027164	Amyotrophic lateral sclerosis || id:ebi-a-GCST90027164	90274765	Weighted median	4	-0.00754805	0.0606073	0.900888	0.99248	0.881317	1.11767	1.25782	2	0.533173	-0.0583608	0.156072	0.226
29	C-C motif chemokine 19 levels	ebi-a-GCST90027164	Amyotrophic lateral sclerosis || id:ebi-a-GCST90027164	90274765	Inverse variance weighted	4	0.00431555	0.0629618	0.945354	1.00432	0.887728	1.13624	1.25782	2	0.533173	-0.0583608	0.156072	0.226
30	C-C motif chemokine 19 levels	ebi-a-GCST90027164	Amyotrophic lateral sclerosis || id:ebi-a-GCST90027164	90274765	Simple mode	4	-0.110147	0.105958	0.374977	0.895703	0.727731	1.10245	1.25782	2	0.533173	-0.0583608	0.156072	0.226
31	C-C motif chemokine 19 levels	ebi-a-GCST90027164	Amyotrophic lateral sclerosis || id:ebi-a-GCST90027164	90274765	Weighted mode	4	-0.0686431	0.0959163	0.525876	0.93366	0.773647	1.12677	1.25782	2	0.533173	-0.0583608	0.156072	0.226
32	Vascular endothelial growth factor A levels	ebi-a-GCST90027164	Amyotrophic lateral sclerosis || id:ebi-a-GCST90027164	90274848	MR Egger	7	0.0264677	0.0498256	0.618016	1.02682	0.931285	1.13216	4.65989	5	0.45878	-0.00671513	0.519097	0.56
33	Vascular endothelial growth factor A levels	ebi-a-GCST90027164	Amyotrophic lateral sclerosis || id:ebi-a-GCST90027164	90274848	Weighted median	7	0.0058135	0.0296814	0.844717	1.00583	0.948985	1.06608	4.65989	5	0.45878	-0.00671513	0.519097	0.56
34	Vascular endothelial growth factor A levels	ebi-a-GCST90027164	Amyotrophic lateral sclerosis || id:ebi-a-GCST90027164	90274848	Inverse variance weighted	7	-0.0023439	0.0274728	0.932009	0.997659	0.945359	1.05285	4.65989	5	0.45878	-0.00671513	0.519097	0.56
35	Vascular endothelial growth factor A levels	ebi-a-GCST90027164	Amyotrophic lateral sclerosis || id:ebi-a-GCST90027164	90274848	Simple mode	7	-0.00984004	0.0617242	0.878569	0.990208	0.877376	1.11755	4.65989	5	0.45878	-0.00671513	0.519097	0.56
36	Vascular endothelial growth factor A levels	ebi-a-GCST90027164	Amyotrophic lateral sclerosis || id:ebi-a-GCST90027164	90274848	Weighted mode	7	0.0102456	0.0306697	0.7497	1.0103	0.951356	1.07289	4.65989	5	0.45878	-0.00671513	0.519097	0.56
37	C-X-C motif chemokine 11 levels	ebi-a-GCST90027164	Amyotrophic lateral sclerosis || id:ebi-a-GCST90027164	90274781	MR Egger	6	0.130241	0.093954	0.237944	1.1391	0.947519	1.36943	5.94423	4	0.203352	-0.0240217	0.217325	0.148
38	C-X-C motif chemokine 11 levels	ebi-a-GCST90027164	Amyotrophic lateral sclerosis || id:ebi-a-GCST90027164	90274781	Weighted median	6	-0.0234933	0.0541634	0.664472	0.976781	0.8784	1.08618	5.94423	4	0.203352	-0.0240217	0.217325	0.148
39	C-X-C motif chemokine 11 levels	ebi-a-GCST90027164	Amyotrophic lateral sclerosis || id:ebi-a-GCST90027164	90274781	Inverse variance weighted	6	0.0131968	0.054581	0.808947	1.01328	0.910481	1.12769	5.94423	4	0.203352	-0.0240217	0.217325	0.148
40	C-X-C motif chemokine 11 levels	ebi-a-GCST90027164	Amyotrophic lateral sclerosis || id:ebi-a-GCST90027164	90274781	Simple mode	6	-0.012725	0.0896449	0.892663	0.987356	0.828259	1.17701	5.94423	4	0.203352	-0.0240217	0.217325	0.148
41	C-X-C motif chemokine 11 levels	ebi-a-GCST90027164	Amyotrophic lateral sclerosis || id:ebi-a-GCST90027164	90274781	Weighted mode	6	-0.0297117	0.0645255	0.664515	0.970725	0.855404	1.10159	5.94423	4	0.203352	-0.0240217	0.217325	0.148
42	TNF-related apoptosis-inducing ligand levels	ebi-a-GCST90027164	Amyotrophic lateral sclerosis || id:ebi-a-GCST90027164	90274843	MR Egger	9	-0.0136096	0.0546002	0.810316	0.986483	0.886365	1.09791	11.7643	7	0.108582	0.00643762	0.534493	0.122
43	TNF-related apoptosis-inducing ligand levels	ebi-a-GCST90027164	Amyotrophic lateral sclerosis || id:ebi-a-GCST90027164	90274843	Weighted median	9	0.0231045	0.0395863	0.559457	1.02337	0.946973	1.10594	11.7643	7	0.108582	0.00643762	0.534493	0.122
44	TNF-related apoptosis-inducing ligand levels	ebi-a-GCST90027164	Amyotrophic lateral sclerosis || id:ebi-a-GCST90027164	90274843	Inverse variance weighted	9	0.013219	0.0346613	0.702924	1.01331	0.946753	1.08454	11.7643	7	0.108582	0.00643762	0.534493	0.122
45	TNF-related apoptosis-inducing ligand levels	ebi-a-GCST90027164	Amyotrophic lateral sclerosis || id:ebi-a-GCST90027164	90274843	Simple mode	9	0.102645	0.0668679	0.163321	1.1081	0.971984	1.26327	11.7643	7	0.108582	0.00643762	0.534493	0.122
46	TNF-related apoptosis-inducing ligand levels	ebi-a-GCST90027164	Amyotrophic lateral sclerosis || id:ebi-a-GCST90027164	90274843	Weighted mode	9	0.0997046	0.0552781	0.108937	1.10484	0.991397	1.23127	11.7643	7	0.108582	0.00643762	0.534493	0.122
47	Cystatin D levels	ebi-a-GCST90027164	Amyotrophic lateral sclerosis || id:ebi-a-GCST90027164	90274777	MR Egger	14	-0.0300572	0.041817	0.486038	0.97039	0.894028	1.05327	11.8958	12	0.454088	0.00458471	0.584364	0.535
48	Cystatin D levels	ebi-a-GCST90027164	Amyotrophic lateral sclerosis || id:ebi-a-GCST90027164	90274777	Weighted median	14	0.00534778	0.0299352	0.858216	1.00536	0.948072	1.06611	11.8958	12	0.454088	0.00458471	0.584364	0.535
49	Cystatin D levels	ebi-a-GCST90027164	Amyotrophic lateral sclerosis || id:ebi-a-GCST90027164	90274777	Inverse variance weighted	14	-0.0104095	0.0229581	0.65025	0.989644	0.9461	1.03519	11.8958	12	0.454088	0.00458471	0.584364	0.535
50	Cystatin D levels	ebi-a-GCST90027164	Amyotrophic lateral sclerosis || id:ebi-a-GCST90027164	90274777	Simple mode	14	0.00486773	0.0597664	0.936328	1.00488	0.893799	1.12977	11.8958	12	0.454088	0.00458471	0.584364	0.535
51	Cystatin D levels	ebi-a-GCST90027164	Amyotrophic lateral sclerosis || id:ebi-a-GCST90027164	90274777	Weighted mode	14	0.0103969	0.0293231	0.728601	1.01045	0.954015	1.07023	11.8958	12	0.454088	0.00458471	0.584364	0.535
52	TNF-beta levels	ebi-a-GCST90027164	Amyotrophic lateral sclerosis || id:ebi-a-GCST90027164	90274840	MR Egger	9	-0.0363288	0.0540181	0.522819	0.964323	0.867444	1.07202	17.5629	7	0.014106	-0.00692793	0.684376	0.088
53	TNF-beta levels	ebi-a-GCST90027164	Amyotrophic lateral sclerosis || id:ebi-a-GCST90027164	90274840	Weighted median	9	-0.0387804	0.0250935	0.122241	0.961962	0.915794	1.01046	17.5629	7	0.014106	-0.00692793	0.684376	0.088
54	TNF-beta levels	ebi-a-GCST90027164	Amyotrophic lateral sclerosis || id:ebi-a-GCST90027164	90274840	Inverse variance weighted	9	-0.0546932	0.0305645	0.0735451	0.946776	0.891723	1.00523	17.5629	7	0.014106	-0.00692793	0.684376	0.088
55	TNF-beta levels	ebi-a-GCST90027164	Amyotrophic lateral sclerosis || id:ebi-a-GCST90027164	90274840	Simple mode	9	-0.0231856	0.0357007	0.53425	0.977081	0.911049	1.0479	17.5629	7	0.014106	-0.00692793	0.684376	0.088
56	TNF-beta levels	ebi-a-GCST90027164	Amyotrophic lateral sclerosis || id:ebi-a-GCST90027164	90274840	Weighted mode	9	-0.0340978	0.0243957	0.199744	0.966477	0.921352	1.01381	17.5629	7	0.014106	-0.00692793	0.684376	0.088
57	Protein S100-A12 levels	ebi-a-GCST90027164	Amyotrophic lateral sclerosis || id:ebi-a-GCST90027164	90274786	Inverse variance weighted	2	0.0973775	0.0611141	0.111077	1.10228	0.977843	1.24254	#N/A	#N/A	#N/A	NA	NA	#N/A
58	C-C motif chemokine 28 levels	ebi-a-GCST90027164	Amyotrophic lateral sclerosis || id:ebi-a-GCST90027164	90274769	MR Egger	4	0.166886	0.241	0.560236	1.18162	0.736774	1.89505	1.90723	2	0.385345	-0.011658	0.59623	0.543
59	C-C motif chemokine 28 levels	ebi-a-GCST90027164	Amyotrophic lateral sclerosis || id:ebi-a-GCST90027164	90274769	Weighted median	4	0.035136	0.100849	0.727539	1.03576	0.849992	1.26213	1.90723	2	0.385345	-0.011658	0.59623	0.543
60	C-C motif chemokine 28 levels	ebi-a-GCST90027164	Amyotrophic lateral sclerosis || id:ebi-a-GCST90027164	90274769	Inverse variance weighted	4	0.0260039	0.084459	0.758168	1.02634	0.869762	1.21112	1.90723	2	0.385345	-0.011658	0.59623	0.543
61	C-C motif chemokine 28 levels	ebi-a-GCST90027164	Amyotrophic lateral sclerosis || id:ebi-a-GCST90027164	90274769	Simple mode	4	0.122798	0.141423	0.449112	1.13066	0.856938	1.4918	1.90723	2	0.385345	-0.011658	0.59623	0.543
62	C-C motif chemokine 28 levels	ebi-a-GCST90027164	Amyotrophic lateral sclerosis || id:ebi-a-GCST90027164	90274769	Weighted mode	4	0.115603	0.146943	0.488869	1.12255	0.841638	1.49722	1.90723	2	0.385345	-0.011658	0.59623	0.543
63	Caspase 8 levels	ebi-a-GCST90027164	Amyotrophic lateral sclerosis || id:ebi-a-GCST90027164	90274763	Wald ratio	1	0.0397584	0.0825365	0.630014	1.04056	0.885137	1.22327	#N/A	#N/A	#N/A	#N/A	#N/A	#N/A
64	Tumor necrosis factor ligand superfamily member 14 levels	ebi-a-GCST90027164	Amyotrophic lateral sclerosis || id:ebi-a-GCST90027164	90274842	MR Egger	4	-0.0152177	0.100935	0.893992	0.984897	0.808115	1.20035	5.55343	2	0.0622426	-0.0167407	0.519548	0.259
65	Tumor necrosis factor ligand superfamily member 14 levels	ebi-a-GCST90027164	Amyotrophic lateral sclerosis || id:ebi-a-GCST90027164	90274842	Weighted median	4	-0.0644459	0.0424537	0.129008	0.937587	0.862729	1.01894	5.55343	2	0.0622426	-0.0167407	0.519548	0.259
66	Tumor necrosis factor ligand superfamily member 14 levels	ebi-a-GCST90027164	Amyotrophic lateral sclerosis || id:ebi-a-GCST90027164	90274842	Inverse variance weighted	4	-0.0751672	0.0603364	0.212837	0.927588	0.82413	1.04403	5.55343	2	0.0622426	-0.0167407	0.519548	0.259
67	Tumor necrosis factor ligand superfamily member 14 levels	ebi-a-GCST90027164	Amyotrophic lateral sclerosis || id:ebi-a-GCST90027164	90274842	Simple mode	4	-0.151386	0.0912865	0.195825	0.859516	0.718702	1.02792	5.55343	2	0.0622426	-0.0167407	0.519548	0.259
68	Tumor necrosis factor ligand superfamily member 14 levels	ebi-a-GCST90027164	Amyotrophic lateral sclerosis || id:ebi-a-GCST90027164	90274842	Weighted mode	4	-0.0441095	0.0525268	0.462696	0.956849	0.86324	1.06061	5.55343	2	0.0622426	-0.0167407	0.519548	0.259
69	Macrophage inflammatory protein 1a levels	ebi-a-GCST90027164	Amyotrophic lateral sclerosis || id:ebi-a-GCST90027164	90274825	MR Egger	5	0.0326332	0.0613481	0.631644	1.03317	0.916119	1.16518	4.32977	3	0.227986	-0.0130915	0.398938	0.472
70	Macrophage inflammatory protein 1a levels	ebi-a-GCST90027164	Amyotrophic lateral sclerosis || id:ebi-a-GCST90027164	90274825	Weighted median	5	-0.00120101	0.034929	0.972571	0.9988	0.932709	1.06957	4.32977	3	0.227986	-0.0130915	0.398938	0.472
71	Macrophage inflammatory protein 1a levels	ebi-a-GCST90027164	Amyotrophic lateral sclerosis || id:ebi-a-GCST90027164	90274825	Inverse variance weighted	5	-0.0135481	0.0391518	0.729312	0.986543	0.91367	1.06523	4.32977	3	0.227986	-0.0130915	0.398938	0.472
72	Macrophage inflammatory protein 1a levels	ebi-a-GCST90027164	Amyotrophic lateral sclerosis || id:ebi-a-GCST90027164	90274825	Simple mode	5	0.0618546	0.0946457	0.549073	1.06381	0.883688	1.28064	4.32977	3	0.227986	-0.0130915	0.398938	0.472
73	Macrophage inflammatory protein 1a levels	ebi-a-GCST90027164	Amyotrophic lateral sclerosis || id:ebi-a-GCST90027164	90274825	Weighted mode	5	0.00124898	0.0350557	0.973286	1.00125	0.934765	1.07246	4.32977	3	0.227986	-0.0130915	0.398938	0.472
74	Eukaryotic translation initiation factor 4E-binding protein 1 levels	ebi-a-GCST90027164	Amyotrophic lateral sclerosis || id:ebi-a-GCST90027164	90274758	Inverse variance weighted	2	0.000160815	0.126138	0.998983	1.00016	0.781086	1.28068	#N/A	#N/A	#N/A	NA	NA	#N/A
75	C-X-C motif chemokine 6 levels	ebi-a-GCST90027164	Amyotrophic lateral sclerosis || id:ebi-a-GCST90027164	90274783	MR Egger	5	-0.0343004	0.0420085	0.474013	0.966281	0.889908	1.04921	2.58229	3	0.460604	0.0133831	0.252088	0.554
76	C-X-C motif chemokine 6 levels	ebi-a-GCST90027164	Amyotrophic lateral sclerosis || id:ebi-a-GCST90027164	90274783	Weighted median	5	0.0190431	0.0279788	0.496107	1.01923	0.964838	1.07668	2.58229	3	0.460604	0.0133831	0.252088	0.554
77	C-X-C motif chemokine 6 levels	ebi-a-GCST90027164	Amyotrophic lateral sclerosis || id:ebi-a-GCST90027164	90274783	Inverse variance weighted	5	0.0124306	0.027782	0.654563	1.01251	0.958849	1.06917	2.58229	3	0.460604	0.0133831	0.252088	0.554
78	C-X-C motif chemokine 6 levels	ebi-a-GCST90027164	Amyotrophic lateral sclerosis || id:ebi-a-GCST90027164	90274783	Simple mode	5	0.0702279	0.0583347	0.295005	1.07275	0.956851	1.20269	2.58229	3	0.460604	0.0133831	0.252088	0.554
79	C-X-C motif chemokine 6 levels	ebi-a-GCST90027164	Amyotrophic lateral sclerosis || id:ebi-a-GCST90027164	90274783	Weighted mode	5	0.0214262	0.0310634	0.528278	1.02166	0.96131	1.08579	2.58229	3	0.460604	0.0133831	0.252088	0.554
80	C-X-C motif chemokine 1 levels	ebi-a-GCST90027164	Amyotrophic lateral sclerosis || id:ebi-a-GCST90027164	90274779	MR Egger	3	-0.00535868	0.118365	0.971198	0.994656	0.788712	1.25437	2.81546	1	0.0933603	0.00560512	0.861339	#N/A
81	C-X-C motif chemokine 1 levels	ebi-a-GCST90027164	Amyotrophic lateral sclerosis || id:ebi-a-GCST90027164	90274779	Weighted median	3	0.00422413	0.0405552	0.917044	1.00423	0.927499	1.08732	2.81546	1	0.0933603	0.00560512	0.861339	#N/A
82	C-X-C motif chemokine 1 levels	ebi-a-GCST90027164	Amyotrophic lateral sclerosis || id:ebi-a-GCST90027164	90274779	Inverse variance weighted	3	0.0162702	0.048364	0.736562	1.0164	0.92448	1.11747	2.81546	1	0.0933603	0.00560512	0.861339	#N/A
83	C-X-C motif chemokine 1 levels	ebi-a-GCST90027164	Amyotrophic lateral sclerosis || id:ebi-a-GCST90027164	90274779	Simple mode	3	0.0258337	0.0948502	0.810886	1.02617	0.852082	1.23583	2.81546	1	0.0933603	0.00560512	0.861339	#N/A
84	C-X-C motif chemokine 1 levels	ebi-a-GCST90027164	Amyotrophic lateral sclerosis || id:ebi-a-GCST90027164	90274779	Weighted mode	3	0.000783335	0.0423543	0.986923	1.00078	0.921059	1.08741	2.81546	1	0.0933603	0.00560512	0.861339	#N/A
85	C-C motif chemokine 23 levels	ebi-a-GCST90027164	Amyotrophic lateral sclerosis || id:ebi-a-GCST90027164	90274767	MR Egger	7	0.0206784	0.0502588	0.697794	1.02089	0.925123	1.12658	1.57847	5	0.903841	-0.00322804	0.871379	0.944
86	C-C motif chemokine 23 levels	ebi-a-GCST90027164	Amyotrophic lateral sclerosis || id:ebi-a-GCST90027164	90274767	Weighted median	7	0.00705242	0.0267184	0.791815	1.00708	0.955696	1.06122	1.57847	5	0.903841	-0.00322804	0.871379	0.944
87	C-C motif chemokine 23 levels	ebi-a-GCST90027164	Amyotrophic lateral sclerosis || id:ebi-a-GCST90027164	90274767	Inverse variance weighted	7	0.0130475	0.0228127	0.567362	1.01313	0.968831	1.05946	1.57847	5	0.903841	-0.00322804	0.871379	0.944
88	C-C motif chemokine 23 levels	ebi-a-GCST90027164	Amyotrophic lateral sclerosis || id:ebi-a-GCST90027164	90274767	Simple mode	7	0.0202757	0.0405273	0.634682	1.02048	0.942558	1.10485	1.57847	5	0.903841	-0.00322804	0.871379	0.944
89	C-C motif chemokine 23 levels	ebi-a-GCST90027164	Amyotrophic lateral sclerosis || id:ebi-a-GCST90027164	90274767	Weighted mode	7	0.0114365	0.0283139	0.700274	1.0115	0.956898	1.06922	1.57847	5	0.903841	-0.00322804	0.871379	0.944
90	Programmed cell death 1 ligand 1 levels	ebi-a-GCST90027164	Amyotrophic lateral sclerosis || id:ebi-a-GCST90027164	90274832	Wald ratio	1	-0.00617761	0.0926641	0.946847	0.993841	0.828781	1.19178	#N/A	#N/A	#N/A	#N/A	#N/A	#N/A
91	Fibroblast growth factor 21 levels	ebi-a-GCST90027164	Amyotrophic lateral sclerosis || id:ebi-a-GCST90027164	90274788	MR Egger	3	0.359193	0.26292	0.402257	1.43217	0.855448	2.39771	0.263471	1	0.607746	-0.0364696	0.469271	#N/A
92	Fibroblast growth factor 21 levels	ebi-a-GCST90027164	Amyotrophic lateral sclerosis || id:ebi-a-GCST90027164	90274788	Weighted median	3	0.103685	0.0661312	0.116913	1.10925	0.974401	1.26276	0.263471	1	0.607746	-0.0364696	0.469271	#N/A
93	Fibroblast growth factor 21 levels	ebi-a-GCST90027164	Amyotrophic lateral sclerosis || id:ebi-a-GCST90027164	90274788	Inverse variance weighted	3	0.0776537	0.061638	0.207729	1.08075	0.957761	1.21953	0.263471	1	0.607746	-0.0364696	0.469271	#N/A
94	Fibroblast growth factor 21 levels	ebi-a-GCST90027164	Amyotrophic lateral sclerosis || id:ebi-a-GCST90027164	90274788	Simple mode	3	0.104071	0.0882404	0.359529	1.10968	0.933439	1.3192	0.263471	1	0.607746	-0.0364696	0.469271	#N/A
95	Fibroblast growth factor 21 levels	ebi-a-GCST90027164	Amyotrophic lateral sclerosis || id:ebi-a-GCST90027164	90274788	Weighted mode	3	0.106719	0.0749111	0.290307	1.11262	0.960687	1.28859	0.263471	1	0.607746	-0.0364696	0.469271	#N/A
96	Macrophage colony-stimulating factor 1 levels	ebi-a-GCST90027164	Amyotrophic lateral sclerosis || id:ebi-a-GCST90027164	90274776	Wald ratio	1	-0.0498812	0.0665083	0.453255	0.951342	0.835072	1.0838	#N/A	#N/A	#N/A	#N/A	#N/A	#N/A
97	Monocyte chemoattractant protein-1 levels	ebi-a-GCST90027164	Amyotrophic lateral sclerosis || id:ebi-a-GCST90027164	90274821	MR Egger	6	0.0219633	0.0993495	0.835864	1.02221	0.841338	1.24196	1.47926	4	0.830308	-0.00105509	0.952985	0.924
98	Monocyte chemoattractant protein-1 levels	ebi-a-GCST90027164	Amyotrophic lateral sclerosis || id:ebi-a-GCST90027164	90274821	Weighted median	6	0.0191678	0.0468301	0.682315	1.01935	0.929955	1.11734	1.47926	4	0.830308	-0.00105509	0.952985	0.924
99	Monocyte chemoattractant protein-1 levels	ebi-a-GCST90027164	Amyotrophic lateral sclerosis || id:ebi-a-GCST90027164	90274821	Inverse variance weighted	6	0.0162537	0.0398486	0.683358	1.01639	0.940024	1.09895	1.47926	4	0.830308	-0.00105509	0.952985	0.924
100	Monocyte chemoattractant protein-1 levels	ebi-a-GCST90027164	Amyotrophic lateral sclerosis || id:ebi-a-GCST90027164	90274821	Simple mode	6	0.0066704	0.066727	0.924256	1.00669	0.883279	1.14735	1.47926	4	0.830308	-0.00105509	0.952985	0.924
101	Monocyte chemoattractant protein-1 levels	ebi-a-GCST90027164	Amyotrophic lateral sclerosis || id:ebi-a-GCST90027164	90274821	Weighted mode	6	0.0303028	0.0515112	0.581914	1.03077	0.931779	1.14027	1.47926	4	0.830308	-0.00105509	0.952985	0.924
102	Neurotrophin-3 levels	ebi-a-GCST90027164	Amyotrophic lateral sclerosis || id:ebi-a-GCST90027164	90274829	Wald ratio	1	0.00770548	0.132705	0.953697	1.00774	0.776936	1.3071	#N/A	#N/A	#N/A	#N/A	#N/A	#N/A
103	Monocyte chemoattractant protein-4 levels	ebi-a-GCST90027164	Amyotrophic lateral sclerosis || id:ebi-a-GCST90027164	90274824	MR Egger	10	0.0372749	0.0816655	0.660215	1.03798	0.88445	1.21816	6.48684	8	0.592868	-0.00647689	0.67544	0.724
104	Monocyte chemoattractant protein-4 levels	ebi-a-GCST90027164	Amyotrophic lateral sclerosis || id:ebi-a-GCST90027164	90274824	Weighted median	10	0.0179821	0.0381272	0.637187	1.01814	0.944833	1.09715	6.48684	8	0.592868	-0.00647689	0.67544	0.724
105	Monocyte chemoattractant protein-4 levels	ebi-a-GCST90027164	Amyotrophic lateral sclerosis || id:ebi-a-GCST90027164	90274824	Inverse variance weighted	10	0.0041336	0.0291579	0.887265	1.00414	0.948365	1.0632	6.48684	8	0.592868	-0.00647689	0.67544	0.724
106	Monocyte chemoattractant protein-4 levels	ebi-a-GCST90027164	Amyotrophic lateral sclerosis || id:ebi-a-GCST90027164	90274824	Simple mode	10	0.0272393	0.0530672	0.620105	1.02761	0.926101	1.14025	6.48684	8	0.592868	-0.00647689	0.67544	0.724
107	Monocyte chemoattractant protein-4 levels	ebi-a-GCST90027164	Amyotrophic lateral sclerosis || id:ebi-a-GCST90027164	90274824	Weighted mode	10	0.0285345	0.0443197	0.535743	1.02895	0.943337	1.12232	6.48684	8	0.592868	-0.00647689	0.67544	0.724
108	Transforming growth factor-alpha levels	ebi-a-GCST90027164	Amyotrophic lateral sclerosis || id:ebi-a-GCST90027164	90274838	Inverse variance weighted	2	-0.00856762	0.163073	0.958099	0.991469	0.720226	1.36486	#N/A	#N/A	#N/A	NA	NA	#N/A
109	Signaling lymphocytic activation molecule levels	ebi-a-GCST90027164	Amyotrophic lateral sclerosis || id:ebi-a-GCST90027164	90274835	MR Egger	7	-0.0184381	0.134152	0.896045	0.981731	0.754744	1.27698	5.01943	5	0.413514	0.00491085	0.751789	0.582
110	Signaling lymphocytic activation molecule levels	ebi-a-GCST90027164	Amyotrophic lateral sclerosis || id:ebi-a-GCST90027164	90274835	Weighted median	7	0.0538078	0.0580718	0.354148	1.05528	0.941752	1.1825	5.01943	5	0.413514	0.00491085	0.751789	0.582
111	Signaling lymphocytic activation molecule levels	ebi-a-GCST90027164	Amyotrophic lateral sclerosis || id:ebi-a-GCST90027164	90274835	Inverse variance weighted	7	0.0236495	0.0461411	0.608268	1.02393	0.935394	1.12085	5.01943	5	0.413514	0.00491085	0.751789	0.582
112	Signaling lymphocytic activation molecule levels	ebi-a-GCST90027164	Amyotrophic lateral sclerosis || id:ebi-a-GCST90027164	90274835	Simple mode	7	0.107697	0.0868654	0.261334	1.11371	0.939357	1.32042	5.01943	5	0.413514	0.00491085	0.751789	0.582
113	Signaling lymphocytic activation molecule levels	ebi-a-GCST90027164	Amyotrophic lateral sclerosis || id:ebi-a-GCST90027164	90274835	Weighted mode	7	0.110752	0.0723038	0.176467	1.11712	0.969511	1.2872	5.01943	5	0.413514	0.00491085	0.751789	0.582
114	Interleukin-8 levels	ebi-a-GCST90027164	Amyotrophic lateral sclerosis || id:ebi-a-GCST90027164	90274817	Inverse variance weighted	2	-0.0433322	0.146656	0.767636	0.957593	0.718365	1.27649	#N/A	#N/A	#N/A	NA	NA	#N/A
115	Oncostatin-M levels	ebi-a-GCST90027164	Amyotrophic lateral sclerosis || id:ebi-a-GCST90027164	90274831	MR Egger	4	-0.00790869	0.2759	0.979735	0.992123	0.577716	1.70379	0.359068	2	0.835659	-0.0191655	0.595814	0.864
116	Oncostatin-M levels	ebi-a-GCST90027164	Amyotrophic lateral sclerosis || id:ebi-a-GCST90027164	90274831	Weighted median	4	-0.14853	0.08252	0.071872	0.861974	0.73325	1.0133	0.359068	2	0.835659	-0.0191655	0.595814	0.864
117	Oncostatin-M levels	ebi-a-GCST90027164	Amyotrophic lateral sclerosis || id:ebi-a-GCST90027164	90274831	Inverse variance weighted	4	-0.17429	0.0723636	0.016017	0.840053	0.72897	0.968064	0.359068	2	0.835659	-0.0191655	0.595814	0.864
118	Oncostatin-M levels	ebi-a-GCST90027164	Amyotrophic lateral sclerosis || id:ebi-a-GCST90027164	90274831	Simple mode	4	-0.157677	0.1097	0.246173	0.854126	0.68888	1.05901	0.359068	2	0.835659	-0.0191655	0.595814	0.864
119	Oncostatin-M levels	ebi-a-GCST90027164	Amyotrophic lateral sclerosis || id:ebi-a-GCST90027164	90274831	Weighted mode	4	-0.146966	0.0911226	0.205178	0.863323	0.722118	1.03214	0.359068	2	0.835659	-0.0191655	0.595814	0.864
120	C-X-C motif chemokine 10 levels	ebi-a-GCST90027164	Amyotrophic lateral sclerosis || id:ebi-a-GCST90027164	90274780	MR Egger	6	0.112783	0.0772904	0.218274	1.11939	0.962033	1.30248	2.11993	4	0.713711	-0.0230026	0.171438	0.461
121	C-X-C motif chemokine 10 levels	ebi-a-GCST90027164	Amyotrophic lateral sclerosis || id:ebi-a-GCST90027164	90274780	Weighted median	6	0.0381571	0.0568612	0.502184	1.03889	0.92933	1.16138	2.11993	4	0.713711	-0.0230026	0.171438	0.461
122	C-X-C motif chemokine 10 levels	ebi-a-GCST90027164	Amyotrophic lateral sclerosis || id:ebi-a-GCST90027164	90274780	Inverse variance weighted	6	0.0093046	0.0459	0.839358	1.00935	0.922508	1.10436	2.11993	4	0.713711	-0.0230026	0.171438	0.461
123	C-X-C motif chemokine 10 levels	ebi-a-GCST90027164	Amyotrophic lateral sclerosis || id:ebi-a-GCST90027164	90274780	Simple mode	6	0.00676485	0.0864839	0.940686	1.00679	0.849809	1.19276	2.11993	4	0.713711	-0.0230026	0.171438	0.461
124	C-X-C motif chemokine 10 levels	ebi-a-GCST90027164	Amyotrophic lateral sclerosis || id:ebi-a-GCST90027164	90274780	Weighted mode	6	0.0596524	0.0696426	0.430821	1.06147	0.926031	1.21671	2.11993	4	0.713711	-0.0230026	0.171438	0.461
125	Hepatocyte growth factor levels	ebi-a-GCST90027164	Amyotrophic lateral sclerosis || id:ebi-a-GCST90027164	90274793	Inverse variance weighted	2	-0.00641122	0.137261	0.962746	0.993609	0.759236	1.30033	#N/A	#N/A	#N/A	NA	NA	#N/A
126	Osteoprotegerin levels	ebi-a-GCST90027164	Amyotrophic lateral sclerosis || id:ebi-a-GCST90027164	90274830	MR Egger	6	-0.0335545	0.231779	0.891894	0.967002	0.613951	1.52308	12.5196	4	0.0138779	-0.0138181	0.696616	0.157
127	Osteoprotegerin levels	ebi-a-GCST90027164	Amyotrophic lateral sclerosis || id:ebi-a-GCST90027164	90274830	Weighted median	6	-0.130398	0.0613446	0.0335319	0.877746	0.778308	0.989889	12.5196	4	0.0138779	-0.0138181	0.696616	0.157
128	Osteoprotegerin levels	ebi-a-GCST90027164	Amyotrophic lateral sclerosis || id:ebi-a-GCST90027164	90274830	Inverse variance weighted	6	-0.12485	0.0724577	0.0848746	0.882629	0.765775	1.01732	12.5196	4	0.0138779	-0.0138181	0.696616	0.157
129	Osteoprotegerin levels	ebi-a-GCST90027164	Amyotrophic lateral sclerosis || id:ebi-a-GCST90027164	90274830	Simple mode	6	-0.293695	0.122577	0.0619253	0.745504	0.586288	0.947958	12.5196	4	0.0138779	-0.0138181	0.696616	0.157
130	Osteoprotegerin levels	ebi-a-GCST90027164	Amyotrophic lateral sclerosis || id:ebi-a-GCST90027164	90274830	Weighted mode	6	-0.0941188	0.0632095	0.196662	0.910175	0.804118	1.03022	12.5196	4	0.0138779	-0.0138181	0.696616	0.157
131	Interleukin-6 levels	ebi-a-GCST90027164	Amyotrophic lateral sclerosis || id:ebi-a-GCST90027164	90274815	Wald ratio	1	0.0671021	0.067696	0.321574	1.0694	0.936522	1.22114	#N/A	#N/A	#N/A	#N/A	#N/A	#N/A
132	Fms-related tyrosine kinase 3 ligand levels	ebi-a-GCST90027164	Amyotrophic lateral sclerosis || id:ebi-a-GCST90027164	90274791	MR Egger	6	-0.0184786	0.194532	0.928891	0.981691	0.67048	1.43735	1.66807	4	0.79651	-0.00362337	0.846369	0.902
133	Fms-related tyrosine kinase 3 ligand levels	ebi-a-GCST90027164	Amyotrophic lateral sclerosis || id:ebi-a-GCST90027164	90274791	Weighted median	6	-0.0617222	0.0693029	0.373136	0.940144	0.820734	1.07693	1.66807	4	0.79651	-0.00362337	0.846369	0.902
134	Fms-related tyrosine kinase 3 ligand levels	ebi-a-GCST90027164	Amyotrophic lateral sclerosis || id:ebi-a-GCST90027164	90274791	Inverse variance weighted	6	-0.056969	0.0561569	0.310363	0.944623	0.846169	1.05453	1.66807	4	0.79651	-0.00362337	0.846369	0.902
135	Fms-related tyrosine kinase 3 ligand levels	ebi-a-GCST90027164	Amyotrophic lateral sclerosis || id:ebi-a-GCST90027164	90274791	Simple mode	6	-0.0272675	0.0922219	0.779366	0.973101	0.812189	1.16589	1.66807	4	0.79651	-0.00362337	0.846369	0.902
136	Fms-related tyrosine kinase 3 ligand levels	ebi-a-GCST90027164	Amyotrophic lateral sclerosis || id:ebi-a-GCST90027164	90274791	Weighted mode	6	-0.0627399	0.0995543	0.556234	0.939188	0.772699	1.14155	1.66807	4	0.79651	-0.00362337	0.846369	0.902
137	Latency-associated peptide transforming growth factor beta 1 levels	ebi-a-GCST90027164	Amyotrophic lateral sclerosis || id:ebi-a-GCST90027164	90274818	Inverse variance weighted	2	-0.00333398	0.120175	0.977867	0.996672	0.787512	1.26138	#N/A	#N/A	#N/A	NA	NA	#N/A
138	C-C motif chemokine 25 levels	ebi-a-GCST90027164	Amyotrophic lateral sclerosis || id:ebi-a-GCST90027164	90274768	MR Egger	11	0.0264091	0.0417536	0.542794	1.02676	0.94608	1.11432	8.08763	9	0.52534	-0.0157418	0.208929	0.502
139	C-C motif chemokine 25 levels	ebi-a-GCST90027164	Amyotrophic lateral sclerosis || id:ebi-a-GCST90027164	90274768	Weighted median	11	-0.0285687	0.0211916	0.177621	0.971835	0.932297	1.01305	8.08763	9	0.52534	-0.0157418	0.208929	0.502
140	C-C motif chemokine 25 levels	ebi-a-GCST90027164	Amyotrophic lateral sclerosis || id:ebi-a-GCST90027164	90274768	Inverse variance weighted	11	-0.0252541	0.0169194	0.135538	0.975062	0.943257	1.00794	8.08763	9	0.52534	-0.0157418	0.208929	0.502
141	C-C motif chemokine 25 levels	ebi-a-GCST90027164	Amyotrophic lateral sclerosis || id:ebi-a-GCST90027164	90274768	Simple mode	11	-0.0087557	0.0291003	0.769668	0.991283	0.936325	1.04947	8.08763	9	0.52534	-0.0157418	0.208929	0.502
142	C-C motif chemokine 25 levels	ebi-a-GCST90027164	Amyotrophic lateral sclerosis || id:ebi-a-GCST90027164	90274768	Weighted mode	11	-0.0160089	0.0206984	0.457158	0.984119	0.944993	1.02486	8.08763	9	0.52534	-0.0157418	0.208929	0.502
143	Leukemia inhibitory factor receptor levels	ebi-a-GCST90027164	Amyotrophic lateral sclerosis || id:ebi-a-GCST90027164	90274820	MR Egger	3	-0.116892	0.121068	0.511172	0.889681	0.701744	1.12795	2.06387	1	0.150827	0.00323783	0.912886	0.965
144	Leukemia inhibitory factor receptor levels	ebi-a-GCST90027164	Amyotrophic lateral sclerosis || id:ebi-a-GCST90027164	90274820	Weighted median	3	-0.092873	0.0443006	0.0360445	0.911309	0.835519	0.993975	2.06387	1	0.150827	0.00323783	0.912886	0.965
145	Leukemia inhibitory factor receptor levels	ebi-a-GCST90027164	Amyotrophic lateral sclerosis || id:ebi-a-GCST90027164	90274820	Inverse variance weighted	3	-0.102407	0.0427793	0.0166727	0.902662	0.830062	0.981612	2.06387	1	0.150827	0.00323783	0.912886	0.965
146	Leukemia inhibitory factor receptor levels	ebi-a-GCST90027164	Amyotrophic lateral sclerosis || id:ebi-a-GCST90027164	90274820	Simple mode	3	-0.0588159	0.0686789	0.482012	0.94288	0.82413	1.07874	2.06387	1	0.150827	0.00323783	0.912886	0.965
147	Leukemia inhibitory factor receptor levels	ebi-a-GCST90027164	Amyotrophic lateral sclerosis || id:ebi-a-GCST90027164	90274820	Weighted mode	3	-0.077563	0.0473296	0.242926	0.925369	0.843387	1.01532	2.06387	1	0.150827	0.00323783	0.912886	0.965
148	Natural killer cell receptor 2B4 levels	ebi-a-GCST90027164	Amyotrophic lateral sclerosis || id:ebi-a-GCST90027164	90274771	MR Egger	7	0.0821118	0.105923	0.473271	1.08558	0.882058	1.33606	7.24602	5	0.202977	-0.00671339	0.590658	0.316
149	Natural killer cell receptor 2B4 levels	ebi-a-GCST90027164	Amyotrophic lateral sclerosis || id:ebi-a-GCST90027164	90274771	Weighted median	7	0.0406674	0.046129	0.377992	1.04151	0.951472	1.14006	7.24602	5	0.202977	-0.00671339	0.590658	0.316
150	Natural killer cell receptor 2B4 levels	ebi-a-GCST90027164	Amyotrophic lateral sclerosis || id:ebi-a-GCST90027164	90274771	Inverse variance weighted	7	0.0281765	0.0461592	0.541583	1.02858	0.939605	1.12597	7.24602	5	0.202977	-0.00671339	0.590658	0.316
151	Natural killer cell receptor 2B4 levels	ebi-a-GCST90027164	Amyotrophic lateral sclerosis || id:ebi-a-GCST90027164	90274771	Simple mode	7	-0.0344311	0.102443	0.748238	0.966155	0.790397	1.181	7.24602	5	0.202977	-0.00671339	0.590658	0.316
152	Natural killer cell receptor 2B4 levels	ebi-a-GCST90027164	Amyotrophic lateral sclerosis || id:ebi-a-GCST90027164	90274771	Weighted mode	7	0.0548826	0.0536943	0.346151	1.05642	0.950889	1.17366	7.24602	5	0.202977	-0.00671339	0.590658	0.316
153	TNF-related activation-induced cytokine levels	ebi-a-GCST90027164	Amyotrophic lateral sclerosis || id:ebi-a-GCST90027164	90274844	MR Egger	7	0.127776	0.115659	0.319568	1.1363	0.905818	1.42542	8.64482	5	0.124098	-0.0202223	0.288926	0.124
154	TNF-related activation-induced cytokine levels	ebi-a-GCST90027164	Amyotrophic lateral sclerosis || id:ebi-a-GCST90027164	90274844	Weighted median	7	0.0452881	0.0451409	0.315734	1.04633	0.957731	1.14312	8.64482	5	0.124098	-0.0202223	0.288926	0.124
155	TNF-related activation-induced cytokine levels	ebi-a-GCST90027164	Amyotrophic lateral sclerosis || id:ebi-a-GCST90027164	90274844	Inverse variance weighted	7	0.00200187	0.0476844	0.966513	1.002	0.912598	1.10017	8.64482	5	0.124098	-0.0202223	0.288926	0.124
156	TNF-related activation-induced cytokine levels	ebi-a-GCST90027164	Amyotrophic lateral sclerosis || id:ebi-a-GCST90027164	90274844	Simple mode	7	0.0596389	0.0572826	0.337936	1.06145	0.948726	1.18757	8.64482	5	0.124098	-0.0202223	0.288926	0.124
157	TNF-related activation-induced cytokine levels	ebi-a-GCST90027164	Amyotrophic lateral sclerosis || id:ebi-a-GCST90027164	90274844	Weighted mode	7	0.0554812	0.0500854	0.310398	1.05705	0.958212	1.16608	8.64482	5	0.124098	-0.0202223	0.288926	0.124
158	Fibroblast growth factor 23 levels	ebi-a-GCST90027164	Amyotrophic lateral sclerosis || id:ebi-a-GCST90027164	90274789	Inverse variance weighted	2	0.0523147	0.0863643	0.544684	1.05371	0.889621	1.24806	#N/A	#N/A	#N/A	NA	NA	#N/A
159	Matrix metalloproteinase-10 levels	ebi-a-GCST90027164	Amyotrophic lateral sclerosis || id:ebi-a-GCST90027164	90274827	MR Egger	9	0.0230832	0.0351692	0.532576	1.02335	0.955187	1.09638	6.6137	7	0.470177	0.00406236	0.688461	0.618
160	Matrix metalloproteinase-10 levels	ebi-a-GCST90027164	Amyotrophic lateral sclerosis || id:ebi-a-GCST90027164	90274827	Weighted median	9	0.0228874	0.0294456	0.436995	1.02315	0.965774	1.08394	6.6137	7	0.470177	0.00406236	0.688461	0.618
161	Matrix metalloproteinase-10 levels	ebi-a-GCST90027164	Amyotrophic lateral sclerosis || id:ebi-a-GCST90027164	90274827	Inverse variance weighted	9	0.0340783	0.0233455	0.144363	1.03467	0.988389	1.08311	6.6137	7	0.470177	0.00406236	0.688461	0.618
162	Matrix metalloproteinase-10 levels	ebi-a-GCST90027164	Amyotrophic lateral sclerosis || id:ebi-a-GCST90027164	90274827	Simple mode	9	0.01338	0.0476621	0.786044	1.01347	0.923082	1.11271	6.6137	7	0.470177	0.00406236	0.688461	0.618
163	Matrix metalloproteinase-10 levels	ebi-a-GCST90027164	Amyotrophic lateral sclerosis || id:ebi-a-GCST90027164	90274827	Weighted mode	9	0.0218343	0.0276787	0.452942	1.02207	0.968104	1.07905	6.6137	7	0.470177	0.00406236	0.688461	0.618
164	CD40L receptor levels	ebi-a-GCST90027164	Amyotrophic lateral sclerosis || id:ebi-a-GCST90027164	90274772	MR Egger	6	0.051917	0.064086	0.463316	1.05329	0.928958	1.19426	9.87683	4	0.0425544	-0.00746737	0.634449	0.271
165	CD40L receptor levels	ebi-a-GCST90027164	Amyotrophic lateral sclerosis || id:ebi-a-GCST90027164	90274772	Weighted median	6	0.0371179	0.0284391	0.191834	1.03782	0.98155	1.09731	9.87683	4	0.0425544	-0.00746737	0.634449	0.271
166	CD40L receptor levels	ebi-a-GCST90027164	Amyotrophic lateral sclerosis || id:ebi-a-GCST90027164	90274772	Inverse variance weighted	6	0.0266986	0.0380567	0.482961	1.02706	0.953236	1.1066	9.87683	4	0.0425544	-0.00746737	0.634449	0.271
167	CD40L receptor levels	ebi-a-GCST90027164	Amyotrophic lateral sclerosis || id:ebi-a-GCST90027164	90274772	Simple mode	6	0.0807284	0.0626863	0.25419	1.08408	0.958739	1.2258	9.87683	4	0.0425544	-0.00746737	0.634449	0.271
168	CD40L receptor levels	ebi-a-GCST90027164	Amyotrophic lateral sclerosis || id:ebi-a-GCST90027164	90274772	Weighted mode	6	0.0404154	0.0280276	0.208882	1.04124	0.985586	1.10004	9.87683	4	0.0425544	-0.00746737	0.634449	0.271
169	T-cell surface glycoprotein CD5 levels	ebi-a-GCST90027164	Amyotrophic lateral sclerosis || id:ebi-a-GCST90027164	90274773	MR Egger	6	-0.291338	0.489817	0.583997	0.747263	0.28611	1.9517	7.36901	4	0.117626	0.0319576	0.618155	0.204
170	T-cell surface glycoprotein CD5 levels	ebi-a-GCST90027164	Amyotrophic lateral sclerosis || id:ebi-a-GCST90027164	90274773	Weighted median	6	-0.0651342	0.0662019	0.325178	0.936942	0.822925	1.06676	7.36901	4	0.117626	0.0319576	0.618155	0.204
171	T-cell surface glycoprotein CD5 levels	ebi-a-GCST90027164	Amyotrophic lateral sclerosis || id:ebi-a-GCST90027164	90274773	Inverse variance weighted	6	-0.0298271	0.0653835	0.648255	0.970613	0.853868	1.10332	7.36901	4	0.117626	0.0319576	0.618155	0.204
172	T-cell surface glycoprotein CD5 levels	ebi-a-GCST90027164	Amyotrophic lateral sclerosis || id:ebi-a-GCST90027164	90274773	Simple mode	6	-0.052702	0.0889796	0.579422	0.948663	0.79684	1.12941	7.36901	4	0.117626	0.0319576	0.618155	0.204
173	T-cell surface glycoprotein CD5 levels	ebi-a-GCST90027164	Amyotrophic lateral sclerosis || id:ebi-a-GCST90027164	90274773	Weighted mode	6	-0.0802753	0.0689911	0.297105	0.922862	0.80614	1.05648	7.36901	4	0.117626	0.0319576	0.618155	0.204
174	Fractalkine levels	ebi-a-GCST90027164	Amyotrophic lateral sclerosis || id:ebi-a-GCST90027164	90274778	MR Egger	4	0.0661969	0.381949	0.878359	1.06844	0.505391	2.25876	2.68784	2	0.260822	-0.0178474	0.69586	0.464
175	Fractalkine levels	ebi-a-GCST90027164	Amyotrophic lateral sclerosis || id:ebi-a-GCST90027164	90274778	Weighted median	4	-0.134633	0.0906127	0.137331	0.874037	0.731811	1.0439	2.68784	2	0.260822	-0.0178474	0.69586	0.464
176	Fractalkine levels	ebi-a-GCST90027164	Amyotrophic lateral sclerosis || id:ebi-a-GCST90027164	90274778	Inverse variance weighted	4	-0.101926	0.0733724	0.164785	0.903097	0.782129	1.04277	2.68784	2	0.260822	-0.0178474	0.69586	0.464
177	Fractalkine levels	ebi-a-GCST90027164	Amyotrophic lateral sclerosis || id:ebi-a-GCST90027164	90274778	Simple mode	4	-0.184203	0.146151	0.296656	0.831767	0.62459	1.10766	2.68784	2	0.260822	-0.0178474	0.69586	0.464
178	Fractalkine levels	ebi-a-GCST90027164	Amyotrophic lateral sclerosis || id:ebi-a-GCST90027164	90274778	Weighted mode	4	-0.18766	0.120879	0.218361	0.828896	0.654043	1.0505	2.68784	2	0.260822	-0.0178474	0.69586	0.464
179	Interleukin-17C levels	ebi-a-GCST90027164	Amyotrophic lateral sclerosis || id:ebi-a-GCST90027164	90274802	Inverse variance weighted	2	0.181139	0.091331	0.0473315	1.19858	1.00213	1.43354	#N/A	#N/A	#N/A	NA	NA	#N/A
180	Matrix metalloproteinase-1 levels	ebi-a-GCST90027164	Amyotrophic lateral sclerosis || id:ebi-a-GCST90027164	90274826	MR Egger	14	0.0957226	0.0692931	0.192331	1.10045	0.960701	1.26054	17.9648	12	0.116764	-0.0185164	0.0749824	0.031
181	Matrix metalloproteinase-1 levels	ebi-a-GCST90027164	Amyotrophic lateral sclerosis || id:ebi-a-GCST90027164	90274826	Weighted median	14	-0.00263896	0.0497416	0.957689	0.997365	0.904718	1.0995	17.9648	12	0.116764	-0.0185164	0.0749824	0.031
182	Matrix metalloproteinase-1 levels	ebi-a-GCST90027164	Amyotrophic lateral sclerosis || id:ebi-a-GCST90027164	90274826	Inverse variance weighted	14	-0.0162467	0.042742	0.703864	0.983885	0.904818	1.06986	17.9648	12	0.116764	-0.0185164	0.0749824	0.031
183	Matrix metalloproteinase-1 levels	ebi-a-GCST90027164	Amyotrophic lateral sclerosis || id:ebi-a-GCST90027164	90274826	Simple mode	14	-0.133737	0.106793	0.232521	0.87482	0.709602	1.07851	17.9648	12	0.116764	-0.0185164	0.0749824	0.031
184	Matrix metalloproteinase-1 levels	ebi-a-GCST90027164	Amyotrophic lateral sclerosis || id:ebi-a-GCST90027164	90274826	Weighted mode	14	0.103388	0.0701504	0.164332	1.10892	0.966469	1.27237	17.9648	12	0.116764	-0.0185164	0.0749824	0.031
185	CUB domain-containing protein 1 levels	ebi-a-GCST90027164	Amyotrophic lateral sclerosis || id:ebi-a-GCST90027164	90274775	MR Egger	4	-0.0028681	0.0749665	0.972957	0.997136	0.860878	1.15496	0.711266	2	0.70073	-0.0082264	0.611875	0.697
186	CUB domain-containing protein 1 levels	ebi-a-GCST90027164	Amyotrophic lateral sclerosis || id:ebi-a-GCST90027164	90274775	Weighted median	4	-0.0533145	0.0403097	0.185961	0.948082	0.876059	1.02603	0.711266	2	0.70073	-0.0082264	0.611875	0.697
187	CUB domain-containing protein 1 levels	ebi-a-GCST90027164	Amyotrophic lateral sclerosis || id:ebi-a-GCST90027164	90274775	Inverse variance weighted	4	-0.0418315	0.0366074	0.253161	0.959031	0.892631	1.03037	0.711266	2	0.70073	-0.0082264	0.611875	0.697
188	CUB domain-containing protein 1 levels	ebi-a-GCST90027164	Amyotrophic lateral sclerosis || id:ebi-a-GCST90027164	90274775	Simple mode	4	-0.0844937	0.0628427	0.271401	0.918977	0.812479	1.03944	0.711266	2	0.70073	-0.0082264	0.611875	0.697
189	CUB domain-containing protein 1 levels	ebi-a-GCST90027164	Amyotrophic lateral sclerosis || id:ebi-a-GCST90027164	90274775	Weighted mode	4	-0.00858233	0.0452245	0.861602	0.991454	0.907354	1.08335	0.711266	2	0.70073	-0.0082264	0.611875	0.697
190	C-X-C motif chemokine 5 levels	ebi-a-GCST90027164	Amyotrophic lateral sclerosis || id:ebi-a-GCST90027164	90274782	MR Egger	5	0.02476	0.0467625	0.633149	1.02507	0.935294	1.12346	1.27527	3	0.735014	0.0034502	0.723605	0.869
191	C-X-C motif chemokine 5 levels	ebi-a-GCST90027164	Amyotrophic lateral sclerosis || id:ebi-a-GCST90027164	90274782	Weighted median	5	0.0340118	0.0336936	0.312762	1.0346	0.96848	1.10523	1.27527	3	0.735014	0.0034502	0.723605	0.869
192	C-X-C motif chemokine 5 levels	ebi-a-GCST90027164	Amyotrophic lateral sclerosis || id:ebi-a-GCST90027164	90274782	Inverse variance weighted	5	0.0383586	0.0310045	0.216016	1.0391	0.977839	1.10421	1.27527	3	0.735014	0.0034502	0.723605	0.869
193	C-X-C motif chemokine 5 levels	ebi-a-GCST90027164	Amyotrophic lateral sclerosis || id:ebi-a-GCST90027164	90274782	Simple mode	5	0.0525371	0.0615291	0.441303	1.05394	0.934204	1.18903	1.27527	3	0.735014	0.0034502	0.723605	0.869
194	C-X-C motif chemokine 5 levels	ebi-a-GCST90027164	Amyotrophic lateral sclerosis || id:ebi-a-GCST90027164	90274782	Weighted mode	5	0.033034	0.0364839	0.416439	1.03359	0.962256	1.1102	1.27527	3	0.735014	0.0034502	0.723605	0.869
195	Tumor necrosis factor ligand superfamily member 12 levels	ebi-a-GCST90027164	Amyotrophic lateral sclerosis || id:ebi-a-GCST90027164	90274846	MR Egger	7	0.342467	0.130043	0.0463381	1.40842	1.09153	1.8173	8.75826	5	0.119104	-0.045972	0.0601984	0.037
196	Tumor necrosis factor ligand superfamily member 12 levels	ebi-a-GCST90027164	Amyotrophic lateral sclerosis || id:ebi-a-GCST90027164	90274846	Weighted median	7	0.0966973	0.0605824	0.11046	1.10153	0.978197	1.24041	8.75826	5	0.119104	-0.045972	0.0601984	0.037
197	Tumor necrosis factor ligand superfamily member 12 levels	ebi-a-GCST90027164	Amyotrophic lateral sclerosis || id:ebi-a-GCST90027164	90274846	Inverse variance weighted	7	0.0533659	0.0689255	0.438781	1.05482	0.921522	1.20739	8.75826	5	0.119104	-0.045972	0.0601984	0.037
198	Tumor necrosis factor ligand superfamily member 12 levels	ebi-a-GCST90027164	Amyotrophic lateral sclerosis || id:ebi-a-GCST90027164	90274846	Simple mode	7	-0.0963066	0.148287	0.54009	0.908186	0.679126	1.2145	8.75826	5	0.119104	-0.045972	0.0601984	0.037
199	Tumor necrosis factor ligand superfamily member 12 levels	ebi-a-GCST90027164	Amyotrophic lateral sclerosis || id:ebi-a-GCST90027164	90274846	Weighted mode	7	0.18135	0.0567442	0.0186959	1.19884	1.07265	1.33987	8.75826	5	0.119104	-0.045972	0.0601984	0.037
200	Interleukin-15 receptor subunit alpha levels	ebi-a-GCST90027164	Amyotrophic lateral sclerosis || id:ebi-a-GCST90027164	90274800	MR Egger	8	0.0371383	0.0457769	0.448178	1.03784	0.948774	1.13526	5.45023	6	0.487492	-0.00587345	0.592141	0.669
201	Interleukin-15 receptor subunit alpha levels	ebi-a-GCST90027164	Amyotrophic lateral sclerosis || id:ebi-a-GCST90027164	90274800	Weighted median	8	0.022408	0.0264832	0.397485	1.02266	0.970932	1.07715	5.45023	6	0.487492	-0.00587345	0.592141	0.669
202	Interleukin-15 receptor subunit alpha levels	ebi-a-GCST90027164	Amyotrophic lateral sclerosis || id:ebi-a-GCST90027164	90274800	Inverse variance weighted	8	0.0146244	0.0226123	0.517797	1.01473	0.970741	1.06072	5.45023	6	0.487492	-0.00587345	0.592141	0.669
203	Interleukin-15 receptor subunit alpha levels	ebi-a-GCST90027164	Amyotrophic lateral sclerosis || id:ebi-a-GCST90027164	90274800	Simple mode	8	0.0280612	0.0446207	0.549389	1.02846	0.942334	1.12245	5.45023	6	0.487492	-0.00587345	0.592141	0.669
204	Interleukin-15 receptor subunit alpha levels	ebi-a-GCST90027164	Amyotrophic lateral sclerosis || id:ebi-a-GCST90027164	90274800	Weighted mode	8	0.02223	0.0264125	0.4278	1.02248	0.970893	1.07681	5.45023	6	0.487492	-0.00587345	0.592141	0.669
205	C-X-C motif chemokine 9 levels	ebi-a-GCST90027164	Amyotrophic lateral sclerosis || id:ebi-a-GCST90027164	90274784	MR Egger	4	0.596524	0.508595	0.361624	1.8158	0.670104	4.92031	2.63689	2	0.267551	-0.0778577	0.357203	0.358
206	C-X-C motif chemokine 9 levels	ebi-a-GCST90027164	Amyotrophic lateral sclerosis || id:ebi-a-GCST90027164	90274784	Weighted median	4	0.0270619	0.0740973	0.714947	1.02743	0.888546	1.18803	2.63689	2	0.267551	-0.0778577	0.357203	0.358
207	C-X-C motif chemokine 9 levels	ebi-a-GCST90027164	Amyotrophic lateral sclerosis || id:ebi-a-GCST90027164	90274784	Inverse variance weighted	4	-0.000981128	0.0765183	0.98977	0.999019	0.859885	1.16067	2.63689	2	0.267551	-0.0778577	0.357203	0.358
208	C-X-C motif chemokine 9 levels	ebi-a-GCST90027164	Amyotrophic lateral sclerosis || id:ebi-a-GCST90027164	90274784	Simple mode	4	0.123903	0.118076	0.371093	1.13191	0.898054	1.42665	2.63689	2	0.267551	-0.0778577	0.357203	0.358
209	C-X-C motif chemokine 9 levels	ebi-a-GCST90027164	Amyotrophic lateral sclerosis || id:ebi-a-GCST90027164	90274784	Weighted mode	4	0.00385144	0.0868084	0.9674	1.00386	0.846798	1.19005	2.63689	2	0.267551	-0.0778577	0.357203	0.358
210	Monocyte chemoattractant protein 2 levels	ebi-a-GCST90027164	Amyotrophic lateral sclerosis || id:ebi-a-GCST90027164	90274822	MR Egger	11	-0.0115241	0.026666	0.675792	0.988542	0.938203	1.04158	6.08932	9	0.730946	0.00126332	0.911231	0.816
211	Monocyte chemoattractant protein 2 levels	ebi-a-GCST90027164	Amyotrophic lateral sclerosis || id:ebi-a-GCST90027164	90274822	Weighted median	11	-0.00202897	0.0206734	0.921818	0.997973	0.958344	1.03924	6.08932	9	0.730946	0.00126332	0.911231	0.816
212	Monocyte chemoattractant protein 2 levels	ebi-a-GCST90027164	Amyotrophic lateral sclerosis || id:ebi-a-GCST90027164	90274822	Inverse variance weighted	11	-0.00912525	0.0165344	0.58102	0.990916	0.959318	1.02356	6.08932	9	0.730946	0.00126332	0.911231	0.816
213	Monocyte chemoattractant protein 2 levels	ebi-a-GCST90027164	Amyotrophic lateral sclerosis || id:ebi-a-GCST90027164	90274822	Simple mode	11	-0.0159603	0.0321319	0.630129	0.984166	0.924096	1.04814	6.08932	9	0.730946	0.00126332	0.911231	0.816
214	Monocyte chemoattractant protein 2 levels	ebi-a-GCST90027164	Amyotrophic lateral sclerosis || id:ebi-a-GCST90027164	90274822	Weighted mode	11	-0.0132951	0.0207977	0.537024	0.986793	0.947377	1.02785	6.08932	9	0.730946	0.00126332	0.911231	0.816
215	Glial cell line-derived neurotrophic factor levels	ebi-a-GCST90027164	Amyotrophic lateral sclerosis || id:ebi-a-GCST90027164	90274792	MR Egger	9	-0.132294	0.0566948	0.052348	0.876083	0.783945	0.97905	6.5179	7	0.480736	0.0151055	0.180966	0.372
216	Glial cell line-derived neurotrophic factor levels	ebi-a-GCST90027164	Amyotrophic lateral sclerosis || id:ebi-a-GCST90027164	90274792	Weighted median	9	-0.107685	0.0427533	0.0117774	0.897911	0.825735	0.976395	6.5179	7	0.480736	0.0151055	0.180966	0.372
217	Glial cell line-derived neurotrophic factor levels	ebi-a-GCST90027164	Amyotrophic lateral sclerosis || id:ebi-a-GCST90027164	90274792	Inverse variance weighted	9	-0.064771	0.0353913	0.0672296	0.937282	0.874469	1.00461	6.5179	7	0.480736	0.0151055	0.180966	0.372
218	Glial cell line-derived neurotrophic factor levels	ebi-a-GCST90027164	Amyotrophic lateral sclerosis || id:ebi-a-GCST90027164	90274792	Simple mode	9	-0.102788	0.0886806	0.279846	0.902318	0.758356	1.07361	6.5179	7	0.480736	0.0151055	0.180966	0.372
219	Glial cell line-derived neurotrophic factor levels	ebi-a-GCST90027164	Amyotrophic lateral sclerosis || id:ebi-a-GCST90027164	90274792	Weighted mode	9	-0.113958	0.0467365	0.0406723	0.892296	0.81419	0.977894	6.5179	7	0.480736	0.0151055	0.180966	0.372
220	Tumor necrosis factor receptor superfamily member 9 levels	ebi-a-GCST90027164	Amyotrophic lateral sclerosis || id:ebi-a-GCST90027164	90274841	Inverse variance weighted	2	-0.0745343	0.0733531	0.30958	0.928176	0.803879	1.07169	#N/A	#N/A	#N/A	NA	NA	#N/A
221	Interleukin-18 levels	ebi-a-GCST90027164	Amyotrophic lateral sclerosis || id:ebi-a-GCST90027164	90274803	MR Egger	3	-0.0797287	0.176036	0.729263	0.923367	0.653928	1.30382	0.775553	1	0.378505	0.0138699	0.731512	#N/A
222	Interleukin-18 levels	ebi-a-GCST90027164	Amyotrophic lateral sclerosis || id:ebi-a-GCST90027164	90274803	Weighted median	3	-0.00055474	0.0499807	0.991144	0.999445	0.90618	1.10231	0.775553	1	0.378505	0.0138699	0.731512	#N/A
223	Interleukin-18 levels	ebi-a-GCST90027164	Amyotrophic lateral sclerosis || id:ebi-a-GCST90027164	90274803	Inverse variance weighted	3	-0.0031717	0.0432739	0.941573	0.996833	0.915771	1.08507	0.775553	1	0.378505	0.0138699	0.731512	#N/A
224	Interleukin-18 levels	ebi-a-GCST90027164	Amyotrophic lateral sclerosis || id:ebi-a-GCST90027164	90274803	Simple mode	3	0.0394898	0.0679167	0.619741	1.04028	0.910622	1.1884	0.775553	1	0.378505	0.0138699	0.731512	#N/A
225	Interleukin-18 levels	ebi-a-GCST90027164	Amyotrophic lateral sclerosis || id:ebi-a-GCST90027164	90274803	Weighted mode	3	0.0353649	0.0575014	0.601191	1.036	0.925577	1.15959	0.775553	1	0.378505	0.0138699	0.731512	#N/A
226	Interleukin-10 receptor subunit beta levels	ebi-a-GCST90027164	Amyotrophic lateral sclerosis || id:ebi-a-GCST90027164	90274797	MR Egger	6	0.0378081	0.0573443	0.545717	1.03853	0.928127	1.16207	5.42061	4	0.246796	-0.0166014	0.348877	0.392
227	Interleukin-10 receptor subunit beta levels	ebi-a-GCST90027164	Amyotrophic lateral sclerosis || id:ebi-a-GCST90027164	90274797	Weighted median	6	-0.00260649	0.0265458	0.921783	0.997397	0.946829	1.05067	5.42061	4	0.246796	-0.0166014	0.348877	0.392
228	Interleukin-10 receptor subunit beta levels	ebi-a-GCST90027164	Amyotrophic lateral sclerosis || id:ebi-a-GCST90027164	90274797	Inverse variance weighted	6	-0.0145494	0.0294953	0.621815	0.985556	0.930196	1.04421	5.42061	4	0.246796	-0.0166014	0.348877	0.392
229	Interleukin-10 receptor subunit beta levels	ebi-a-GCST90027164	Amyotrophic lateral sclerosis || id:ebi-a-GCST90027164	90274797	Simple mode	6	-0.0321895	0.0571193	0.597397	0.968323	0.865764	1.08303	5.42061	4	0.246796	-0.0166014	0.348877	0.392
230	Interleukin-10 receptor subunit beta levels	ebi-a-GCST90027164	Amyotrophic lateral sclerosis || id:ebi-a-GCST90027164	90274797	Weighted mode	6	-0.00158881	0.0276608	0.95642	0.998412	0.945724	1.05404	5.42061	4	0.246796	-0.0166014	0.348877	0.392
231	Interleukin-1-alpha levels	ebi-a-GCST90027164	Amyotrophic lateral sclerosis || id:ebi-a-GCST90027164	90274805	Wald ratio	1	-0.1741	0.303906	0.56673	0.840213	0.463126	1.52433	#N/A	#N/A	#N/A	#N/A	#N/A	#N/A
232	Interleukin-13 levels	ebi-a-GCST90027164	Amyotrophic lateral sclerosis || id:ebi-a-GCST90027164	90274799	Wald ratio	1	0.152909	0.14885	0.304292	1.16522	0.870371	1.55995	#N/A	#N/A	#N/A	#N/A	#N/A	#N/A
233	Interleukin-20 receptor subunit alpha levels	ebi-a-GCST90027164	Amyotrophic lateral sclerosis || id:ebi-a-GCST90027164	90274808	Wald ratio	1	0.1076	0.146883	0.463828	1.1136	0.835028	1.48511	#N/A	#N/A	#N/A	#N/A	#N/A	#N/A
234	Interleukin-12 subunit beta levels	ebi-a-GCST90027164	Amyotrophic lateral sclerosis || id:ebi-a-GCST90027164	90274798	MR Egger	13	3.63899e-05	0.068895	0.999588	1.00004	0.873718	1.14462	12.5627	11	0.322861	-0.00011248	0.990553	0.444
235	Interleukin-12 subunit beta levels	ebi-a-GCST90027164	Amyotrophic lateral sclerosis || id:ebi-a-GCST90027164	90274798	Weighted median	13	0.00713517	0.0382183	0.8519	1.00716	0.934473	1.0855	12.5627	11	0.322861	-0.00011248	0.990553	0.444
236	Interleukin-12 subunit beta levels	ebi-a-GCST90027164	Amyotrophic lateral sclerosis || id:ebi-a-GCST90027164	90274798	Inverse variance weighted	13	-0.000710873	0.0293626	0.980685	0.999289	0.943403	1.05849	12.5627	11	0.322861	-0.00011248	0.990553	0.444
237	Interleukin-12 subunit beta levels	ebi-a-GCST90027164	Amyotrophic lateral sclerosis || id:ebi-a-GCST90027164	90274798	Simple mode	13	-0.0324925	0.0798359	0.691181	0.96803	0.827811	1.132	12.5627	11	0.322861	-0.00011248	0.990553	0.444
238	Interleukin-12 subunit beta levels	ebi-a-GCST90027164	Amyotrophic lateral sclerosis || id:ebi-a-GCST90027164	90274798	Weighted mode	13	0.000616745	0.0446064	0.989196	1.00062	0.91685	1.09204	12.5627	11	0.322861	-0.00011248	0.990553	0.444
239	Delta and Notch-like epidermal growth factor-related receptor levels	ebi-a-GCST90027164	Amyotrophic lateral sclerosis || id:ebi-a-GCST90027164	90274785	MR Egger	6	-0.014968	0.0922279	0.878943	0.985143	0.82223	1.18034	3.83784	4	0.428396	-0.000306352	0.98004	0.582
240	Delta and Notch-like epidermal growth factor-related receptor levels	ebi-a-GCST90027164	Amyotrophic lateral sclerosis || id:ebi-a-GCST90027164	90274785	Weighted median	6	-0.00371015	0.0491848	0.93987	0.996297	0.904736	1.09712	3.83784	4	0.428396	-0.000306352	0.98004	0.582
241	Delta and Notch-like epidermal growth factor-related receptor levels	ebi-a-GCST90027164	Amyotrophic lateral sclerosis || id:ebi-a-GCST90027164	90274785	Inverse variance weighted	6	-0.0171721	0.0406011	0.672333	0.982974	0.907783	1.06439	3.83784	4	0.428396	-0.000306352	0.98004	0.582
242	Delta and Notch-like epidermal growth factor-related receptor levels	ebi-a-GCST90027164	Amyotrophic lateral sclerosis || id:ebi-a-GCST90027164	90274785	Simple mode	6	0.0523384	0.0834165	0.55791	1.05373	0.894797	1.2409	3.83784	4	0.428396	-0.000306352	0.98004	0.582
243	Delta and Notch-like epidermal growth factor-related receptor levels	ebi-a-GCST90027164	Amyotrophic lateral sclerosis || id:ebi-a-GCST90027164	90274785	Weighted mode	6	0.0247572	0.0576086	0.685269	1.02507	0.915618	1.1476	3.83784	4	0.428396	-0.000306352	0.98004	0.582
244	Monocyte chemoattractant protein-3 levels	ebi-a-GCST90027164	Amyotrophic lateral sclerosis || id:ebi-a-GCST90027164	90274823	MR Egger	6	0.0379935	0.0977278	0.717255	1.03872	0.857655	1.25802	0.956207	4	0.916362	-0.00769743	0.536597	0.926
245	Monocyte chemoattractant protein-3 levels	ebi-a-GCST90027164	Amyotrophic lateral sclerosis || id:ebi-a-GCST90027164	90274823	Weighted median	6	-0.0033629	0.0535203	0.949899	0.996643	0.897392	1.10687	0.956207	4	0.916362	-0.00769743	0.536597	0.926
246	Monocyte chemoattractant protein-3 levels	ebi-a-GCST90027164	Amyotrophic lateral sclerosis || id:ebi-a-GCST90027164	90274823	Inverse variance weighted	6	-0.0204929	0.0452372	0.650541	0.979716	0.896589	1.07055	0.956207	4	0.916362	-0.00769743	0.536597	0.926
247	Monocyte chemoattractant protein-3 levels	ebi-a-GCST90027164	Amyotrophic lateral sclerosis || id:ebi-a-GCST90027164	90274823	Simple mode	6	0.0124075	0.0799816	0.882787	1.01248	0.865579	1.18432	0.956207	4	0.916362	-0.00769743	0.536597	0.926
248	Monocyte chemoattractant protein-3 levels	ebi-a-GCST90027164	Amyotrophic lateral sclerosis || id:ebi-a-GCST90027164	90274823	Weighted mode	6	0.00774714	0.0662049	0.911401	1.00778	0.885136	1.14741	0.956207	4	0.916362	-0.00769743	0.536597	0.926
249	Fibroblast growth factor 5 levels	ebi-a-GCST90027164	Amyotrophic lateral sclerosis || id:ebi-a-GCST90027164	90274790	MR Egger	6	0.0206107	0.0709245	0.785801	1.02082	0.888339	1.17307	7.47343	4	0.112887	0.00826323	0.710479	0.397
250	Fibroblast growth factor 5 levels	ebi-a-GCST90027164	Amyotrophic lateral sclerosis || id:ebi-a-GCST90027164	90274790	Weighted median	6	0.0369431	0.02656	0.164246	1.03763	0.984999	1.09308	7.47343	4	0.112887	0.00826323	0.710479	0.397
251	Fibroblast growth factor 5 levels	ebi-a-GCST90027164	Amyotrophic lateral sclerosis || id:ebi-a-GCST90027164	90274790	Inverse variance weighted	6	0.0452099	0.0319033	0.156456	1.04625	0.982829	1.11376	7.47343	4	0.112887	0.00826323	0.710479	0.397
252	Fibroblast growth factor 5 levels	ebi-a-GCST90027164	Amyotrophic lateral sclerosis || id:ebi-a-GCST90027164	90274790	Simple mode	6	0.0487538	0.100751	0.648903	1.04996	0.861812	1.27919	7.47343	4	0.112887	0.00826323	0.710479	0.397
253	Fibroblast growth factor 5 levels	ebi-a-GCST90027164	Amyotrophic lateral sclerosis || id:ebi-a-GCST90027164	90274790	Weighted mode	6	0.0322791	0.0283008	0.305717	1.03281	0.977076	1.09171	7.47343	4	0.112887	0.00826323	0.710479	0.397
254	SIR2-like protein 2 levels	ebi-a-GCST90027164	Amyotrophic lateral sclerosis || id:ebi-a-GCST90027164	90274834	Wald ratio	1	0.207702	0.108904	0.0564947	1.23085	0.994266	1.52372	#N/A	#N/A	#N/A	#N/A	#N/A	#N/A
255	C-C motif chemokine 4 levels	ebi-a-GCST90027164	Amyotrophic lateral sclerosis || id:ebi-a-GCST90027164	90274770	MR Egger	7	0.0620711	0.0514602	0.281697	1.06404	0.961952	1.17696	5.79007	5	0.327185	-0.0298877	0.123244	0.206
256	C-C motif chemokine 4 levels	ebi-a-GCST90027164	Amyotrophic lateral sclerosis || id:ebi-a-GCST90027164	90274770	Weighted median	7	0.00429124	0.0303198	0.887449	1.0043	0.946357	1.06579	5.79007	5	0.327185	-0.0298877	0.123244	0.206
257	C-C motif chemokine 4 levels	ebi-a-GCST90027164	Amyotrophic lateral sclerosis || id:ebi-a-GCST90027164	90274770	Inverse variance weighted	7	-0.0190808	0.0319793	0.550734	0.9811	0.921493	1.04456	5.79007	5	0.327185	-0.0298877	0.123244	0.206
258	C-C motif chemokine 4 levels	ebi-a-GCST90027164	Amyotrophic lateral sclerosis || id:ebi-a-GCST90027164	90274770	Simple mode	7	-0.0094721	0.0553095	0.869652	0.990573	0.888804	1.10399	5.79007	5	0.327185	-0.0298877	0.123244	0.206
259	C-C motif chemokine 4 levels	ebi-a-GCST90027164	Amyotrophic lateral sclerosis || id:ebi-a-GCST90027164	90274770	Weighted mode	7	0.00725025	0.0295498	0.814357	1.00728	0.950595	1.06734	5.79007	5	0.327185	-0.0298877	0.123244	0.206
260	C-C motif chemokine 20 levels	ebi-a-GCST90027164	Amyotrophic lateral sclerosis || id:ebi-a-GCST90027164	90274766	Inverse variance weighted	2	-0.134961	0.200687	0.501268	0.87375	0.589602	1.29484	#N/A	#N/A	#N/A	NA	NA	#N/A
261	T-cell surface glycoprotein CD6 isoform levels	ebi-a-GCST90027164	Amyotrophic lateral sclerosis || id:ebi-a-GCST90027164	90274774	MR Egger	9	0.0133648	0.040827	0.752974	1.01345	0.935517	1.09789	7.83071	7	0.347758	-0.0073494	0.582647	0.574
262	T-cell surface glycoprotein CD6 isoform levels	ebi-a-GCST90027164	Amyotrophic lateral sclerosis || id:ebi-a-GCST90027164	90274774	Weighted median	9	-0.000767309	0.0227465	0.97309	0.999233	0.955663	1.04479	7.83071	7	0.347758	-0.0073494	0.582647	0.574
263	T-cell surface glycoprotein CD6 isoform levels	ebi-a-GCST90027164	Amyotrophic lateral sclerosis || id:ebi-a-GCST90027164	90274774	Inverse variance weighted	9	-0.00658676	0.0206898	0.750213	0.993435	0.953955	1.03455	7.83071	7	0.347758	-0.0073494	0.582647	0.574
264	T-cell surface glycoprotein CD6 isoform levels	ebi-a-GCST90027164	Amyotrophic lateral sclerosis || id:ebi-a-GCST90027164	90274774	Simple mode	9	-0.0224695	0.0480452	0.652493	0.977781	0.889907	1.07433	7.83071	7	0.347758	-0.0073494	0.582647	0.574
265	T-cell surface glycoprotein CD6 isoform levels	ebi-a-GCST90027164	Amyotrophic lateral sclerosis || id:ebi-a-GCST90027164	90274774	Weighted mode	9	-0.00105217	0.0233789	0.965206	0.998948	0.954207	1.04579	7.83071	7	0.347758	-0.0073494	0.582647	0.574
266	Eotaxin levels	ebi-a-GCST90027164	Amyotrophic lateral sclerosis || id:ebi-a-GCST90027164	90274764	MR Egger	7	0.00559096	0.13524	0.968624	1.00561	0.771453	1.31083	12.8436	5	0.024889	0.00844747	0.662307	0.089
267	Eotaxin levels	ebi-a-GCST90027164	Amyotrophic lateral sclerosis || id:ebi-a-GCST90027164	90274764	Weighted median	7	0.0339881	0.0556055	0.541043	1.03457	0.927745	1.1537	12.8436	5	0.024889	0.00844747	0.662307	0.089
268	Eotaxin levels	ebi-a-GCST90027164	Amyotrophic lateral sclerosis || id:ebi-a-GCST90027164	90274764	Inverse variance weighted	7	0.060299	0.0616589	0.328102	1.06215	0.941244	1.1986	12.8436	5	0.024889	0.00844747	0.662307	0.089
269	Eotaxin levels	ebi-a-GCST90027164	Amyotrophic lateral sclerosis || id:ebi-a-GCST90027164	90274764	Simple mode	7	0.0969206	0.0894409	0.320143	1.10177	0.92461	1.31288	12.8436	5	0.024889	0.00844747	0.662307	0.089
270	Eotaxin levels	ebi-a-GCST90027164	Amyotrophic lateral sclerosis || id:ebi-a-GCST90027164	90274764	Weighted mode	7	0.0378442	0.0598255	0.550342	1.03857	0.923658	1.16778	12.8436	5	0.024889	0.00844747	0.662307	0.089
271	interleukin-18 receptor 1 levels	ebi-a-GCST90027164	Amyotrophic lateral sclerosis || id:ebi-a-GCST90027164	90274804	MR Egger	16	-0.0791934	0.0390165	0.0618348	0.923861	0.855845	0.997283	19.9376	14	0.132122	0.0307229	0.0487604	0.057
272	interleukin-18 receptor 1 levels	ebi-a-GCST90027164	Amyotrophic lateral sclerosis || id:ebi-a-GCST90027164	90274804	Weighted median	16	0.00579045	0.0210341	0.783095	1.00581	0.965184	1.04814	19.9376	14	0.132122	0.0307229	0.0487604	0.057
273	interleukin-18 receptor 1 levels	ebi-a-GCST90027164	Amyotrophic lateral sclerosis || id:ebi-a-GCST90027164	90274804	Inverse variance weighted	16	-0.00441785	0.020011	0.825271	0.995592	0.957299	1.03542	19.9376	14	0.132122	0.0307229	0.0487604	0.057
274	interleukin-18 receptor 1 levels	ebi-a-GCST90027164	Amyotrophic lateral sclerosis || id:ebi-a-GCST90027164	90274804	Simple mode	16	0.0258845	0.0354092	0.476038	1.02622	0.957416	1.09997	19.9376	14	0.132122	0.0307229	0.0487604	0.057
275	interleukin-18 receptor 1 levels	ebi-a-GCST90027164	Amyotrophic lateral sclerosis || id:ebi-a-GCST90027164	90274804	Weighted mode	16	-0.00226926	0.0188951	0.905999	0.997733	0.961459	1.03538	19.9376	14	0.132122	0.0307229	0.0487604	0.057
276	Interleukin-10 levels	ebi-a-GCST90027164	Amyotrophic lateral sclerosis || id:ebi-a-GCST90027164	90274795	MR Egger	5	0.355492	0.320837	0.348704	1.42688	0.760828	2.67603	0.699725	3	0.873269	-0.0534699	0.310053	0.699
277	Interleukin-10 levels	ebi-a-GCST90027164	Amyotrophic lateral sclerosis || id:ebi-a-GCST90027164	90274795	Weighted median	5	-0.00261357	0.0762215	0.972647	0.99739	0.858982	1.1581	0.699725	3	0.873269	-0.0534699	0.310053	0.699
278	Interleukin-10 levels	ebi-a-GCST90027164	Amyotrophic lateral sclerosis || id:ebi-a-GCST90027164	90274795	Inverse variance weighted	5	-0.0281222	0.062065	0.65047	0.97227	0.860906	1.09804	0.699725	3	0.873269	-0.0534699	0.310053	0.699
279	Interleukin-10 levels	ebi-a-GCST90027164	Amyotrophic lateral sclerosis || id:ebi-a-GCST90027164	90274795	Simple mode	5	-0.000773829	0.101441	0.994279	0.999226	0.819059	1.21903	0.699725	3	0.873269	-0.0534699	0.310053	0.699
280	Interleukin-10 levels	ebi-a-GCST90027164	Amyotrophic lateral sclerosis || id:ebi-a-GCST90027164	90274795	Weighted mode	5	0.0165416	0.0929656	0.867424	1.01668	0.847325	1.21988	0.699725	3	0.873269	-0.0534699	0.310053	0.699
