# Supplementary material for: Genome-wide association analysis reveals potential genetic correlation and causality between circulating inflammatory proteins and amyotrophic lateral sclerosis
Source: Aging (Albany NY). 2024 May 30;16(11):9470–84. doi: 10.18632/aging.205878 (PMC11210256; doi:10.18632/aging.205878)
Supplement: Supplementary Table 8 [file aging-16-205878-s008.xls]

## Sheet: content
content	Supplementary table
Data Sources	S1
Genetic correlation genetic overlap and genetic causation results between circulating inflammatory proteins and ALS	S2
Shared sites between C-C motif chemokine 28 levels and ALS	S3
Shared sites between Interleukin-18 levels and ALS	S4
Shared sites between C-X-C motif chemokine 1 levels and ALS	S5
Shared sites between Leukemia inhibitory factor receptor levels and ALS	S6
Results of Forward Mendelian Randomization Analysis between 91 inflammatory proteins and ALS (snp p<5e-8)	S7
Exclude rs112665079 and reperform the Mendelian randomization analysis	S8
Results of Reverse Mendelian Randomization Analysis between 91 inflammatory proteins and ALS	S9

## Sheet: Supplementary Table 8
Supplementary Table 8. Exclude rs112665079 and reperform the Mendelian randomization analysis.
SNP（P < 5×10 -8）	id.exposure	id.outcome	outcome	exposure	method	nsnp	b	se	pval	OR	lower	upper
1	Adenosine Deaminase levels	ebi-a-GCST90027164	Amyotrophic lateral sclerosis || id:ebi-a-GCST90027164	90274759	MR Egger	3	-0.0413522	0.0617065	0.624136	0.959491	0.850189	1.08285
2	Adenosine Deaminase levels	ebi-a-GCST90027164	Amyotrophic lateral sclerosis || id:ebi-a-GCST90027164	90274759	Weighted median	3	-0.0274654	0.0410568	0.503521	0.972908	0.897684	1.05444
3	Adenosine Deaminase levels	ebi-a-GCST90027164	Amyotrophic lateral sclerosis || id:ebi-a-GCST90027164	90274759	Inverse variance weighted	3	-0.0083052	0.0396983	0.834286	0.991729	0.91749	1.07198
4	Adenosine Deaminase levels	ebi-a-GCST90027164	Amyotrophic lateral sclerosis || id:ebi-a-GCST90027164	90274759	Simple mode	3	-0.0273826	0.0611135	0.69797	0.972989	0.863152	1.0968
5	Adenosine Deaminase levels	ebi-a-GCST90027164	Amyotrophic lateral sclerosis || id:ebi-a-GCST90027164	90274759	Weighted mode	3	-0.0278679	0.0498658	0.632483	0.972517	0.881963	1.07237
