# Supplementary material for: Genome-wide association analysis reveals potential genetic correlation and causality between circulating inflammatory proteins and amyotrophic lateral sclerosis
Source: Aging (Albany NY). 2024 May 30;16(11):9470–84. doi: 10.18632/aging.205878 (PMC11210256; doi:10.18632/aging.205878)
Supplement: Supplementary Table 9 [file aging-16-205878-s009.xls]

## Sheet: content
content	Supplementary table
Data Sources	S1
Genetic correlation genetic overlap and genetic causation results between circulating inflammatory proteins and ALS	S2
Shared sites between C-C motif chemokine 28 levels and ALS	S3
Shared sites between Interleukin-18 levels and ALS	S4
Shared sites between C-X-C motif chemokine 1 levels and ALS	S5
Shared sites between Leukemia inhibitory factor receptor levels and ALS	S6
Results of Forward Mendelian Randomization Analysis between 91 inflammatory proteins and ALS (snp p<5e-8)	S7
Exclude rs112665079 and reperform the Mendelian randomization analysis	S8
Results of Reverse Mendelian Randomization Analysis between 91 inflammatory proteins and ALS	S9

## Sheet: Supplementary Table 9
Supplementary Table 9. Results of reverse Mendelian randomization analysis between 91 inflammatory proteins and ALS.
Select snp p_value < 5e-8, clump_kb = 5000, clump_r2 = 0.01
	id.exposure	id.outcome	outcome	exposure	method	nsnp	b	se	pval	OR	lower	upper	Q	Q_df	Q_pval(MR Egger)	egger_intercept	pval(egger_intercept)	p mr_presso
1	Amyotrophic lateral sclerosis	Eukaryotic translation initiation factor 4E-binding protein 1 levels	90274758	|| id:ebi-a-GCST90027164	MR Egger	14	-0.040706	0.0761404	0.602679	0.960111	0.827008	1.11464	11.7679	12	0.464492	0.00358334	0.687931	0.514
2	Amyotrophic lateral sclerosis	Eukaryotic translation initiation factor 4E-binding protein 1 levels	90274758	|| id:ebi-a-GCST90027164	Weighted median	14	-0.0147384	0.0531084	0.781385	0.98537	0.887958	1.09347	11.7679	12	0.464492	0.00358334	0.687931	0.514
3	Amyotrophic lateral sclerosis	Eukaryotic translation initiation factor 4E-binding protein 1 levels	90274758	|| id:ebi-a-GCST90027164	Inverse variance weighted	14	-0.0132185	0.0365546	0.717643	0.986868	0.918636	1.06017	11.7679	12	0.464492	0.00358334	0.687931	0.514
4	Amyotrophic lateral sclerosis	Eukaryotic translation initiation factor 4E-binding protein 1 levels	90274758	|| id:ebi-a-GCST90027164	Simple mode	14	-0.011387	0.0886113	0.899716	0.988678	0.83105	1.1762	11.7679	12	0.464492	0.00358334	0.687931	0.514
5	Amyotrophic lateral sclerosis	Eukaryotic translation initiation factor 4E-binding protein 1 levels	90274758	|| id:ebi-a-GCST90027164	Weighted mode	14	-0.0218838	0.0751957	0.775624	0.978354	0.844283	1.13371	11.7679	12	0.464492	0.00358334	0.687931	0.514
6	Amyotrophic lateral sclerosis	Adenosine Deaminase levels	90274759	|| id:ebi-a-GCST90027164	MR Egger	14	0.0263622	0.0816781	0.752433	1.02671	0.874829	1.20497	14.1759	12	0.289615	-0.00400676	0.675339	0.266
7	Amyotrophic lateral sclerosis	Adenosine Deaminase levels	90274759	|| id:ebi-a-GCST90027164	Weighted median	14	-0.00028145	3	0.995888	0.999719	0.898231	1.11267	14.1759	12	0.289615	-0.00400676	0.675339	0.266
8	Amyotrophic lateral sclerosis	Adenosine Deaminase levels	90274759	|| id:ebi-a-GCST90027164	Inverse variance weighted	14	-0.00444455	0.0377542	0.906287	0.995565	0.924555	1.07203	14.1759	12	0.289615	-0.00400676	0.675339	0.266
9	Amyotrophic lateral sclerosis	Adenosine Deaminase levels	90274759	|| id:ebi-a-GCST90027164	Simple mode	14	0.0163976	0.112661	0.886511	1.01653	0.815121	1.26771	14.1759	12	0.289615	-0.00400676	0.675339	0.266
10	Amyotrophic lateral sclerosis	Adenosine Deaminase levels	90274759	|| id:ebi-a-GCST90027164	Weighted mode	14	-0.132576	0.092902	0.17714	0.875836	0.730034	1.05076	14.1759	12	0.289615	-0.00400676	0.675339	0.266
11	Amyotrophic lateral sclerosis	Artemin levels	90274760	|| id:ebi-a-GCST90027164	MR Egger	14	-0.0426832	0.0856669	0.627317	0.958215	0.810106	1.1334	12.364	12	0.416906	0.0127292	0.219532	0.389
12	Amyotrophic lateral sclerosis	Artemin levels	90274760	|| id:ebi-a-GCST90027164	Weighted median	14	0.044272	0.0570796	0.437974	1.04527	0.934631	1.169	12.364	12	0.416906	0.0127292	0.219532	0.389
13	Amyotrophic lateral sclerosis	Artemin levels	90274760	|| id:ebi-a-GCST90027164	Inverse variance weighted	14	0.0547267	0.042102	0.193648	1.05625	0.97259	1.14711	12.364	12	0.416906	0.0127292	0.219532	0.389
14	Amyotrophic lateral sclerosis	Artemin levels	90274760	|| id:ebi-a-GCST90027164	Simple mode	14	0.189743	0.101664	0.0847065	1.20894	0.990526	1.47551	12.364	12	0.416906	0.0127292	0.219532	0.389
15	Amyotrophic lateral sclerosis	Artemin levels	90274760	|| id:ebi-a-GCST90027164	Weighted mode	14	0.0499031	0.0746265	0.515383	1.05117	0.908133	1.21673	12.364	12	0.416906	0.0127292	0.219532	0.389
16	Amyotrophic lateral sclerosis	Axin-1 levels	90274761	|| id:ebi-a-GCST90027164	MR Egger	14	-0.0557338	0.0847717	0.523298	0.945791	0.801006	1.11675	6.85837	12	0.86683	0.000370385	0.970248	0.906
17	Amyotrophic lateral sclerosis	Axin-1 levels	90274761	|| id:ebi-a-GCST90027164	Weighted median	14	-0.0247177	0.0559414	0.658599	0.975585	0.874273	1.08864	6.85837	12	0.86683	0.000370385	0.970248	0.906
18	Amyotrophic lateral sclerosis	Axin-1 levels	90274761	|| id:ebi-a-GCST90027164	Inverse variance weighted	14	-0.0529024	0.0407261	0.19395	0.948473	0.875705	1.02729	6.85837	12	0.86683	0.000370385	0.970248	0.906
19	Amyotrophic lateral sclerosis	Axin-1 levels	90274761	|| id:ebi-a-GCST90027164	Simple mode	14	-0.159532	0.0993109	0.132194	0.852543	0.701748	1.03574	6.85837	12	0.86683	0.000370385	0.970248	0.906
20	Amyotrophic lateral sclerosis	Axin-1 levels	90274761	|| id:ebi-a-GCST90027164	Weighted mode	14	0.0287325	0.0719281	0.696039	1.02915	0.893824	1.18496	6.85837	12	0.86683	0.000370385	0.970248	0.906
21	Amyotrophic lateral sclerosis	beta-nerve growth factor levels	90274762	|| id:ebi-a-GCST90027164	MR Egger	14	0.0864805	0.11791	0.477373	1.09033	0.865348	1.37381	30.9012	12	0.00203953	-0.00389364	0.777259	0.003
22	Amyotrophic lateral sclerosis	beta-nerve growth factor levels	90274762	|| id:ebi-a-GCST90027164	Weighted median	14	0.0234119	0.0529719	0.658511	1.02369	0.922735	1.13569	30.9012	12	0.00203953	-0.00389364	0.777259	0.003
23	Amyotrophic lateral sclerosis	beta-nerve growth factor levels	90274762	|| id:ebi-a-GCST90027164	Inverse variance weighted	14	0.0564645	0.0540328	0.296021	1.05809	0.951762	1.17629	30.9012	12	0.00203953	-0.00389364	0.777259	0.003
24	Amyotrophic lateral sclerosis	beta-nerve growth factor levels	90274762	|| id:ebi-a-GCST90027164	Simple mode	14	-0.029379	0.0874492	0.742265	0.971048	0.818093	1.1526	30.9012	12	0.00203953	-0.00389364	0.777259	0.003
25	Amyotrophic lateral sclerosis	beta-nerve growth factor levels	90274762	|| id:ebi-a-GCST90027164	Weighted mode	14	0.00810159	0.0721488	0.912309	1.00813	0.875194	1.16127	30.9012	12	0.00203953	-0.00389364	0.777259	0.003
26	Amyotrophic lateral sclerosis	Caspase 8 levels	90274763	|| id:ebi-a-GCST90027164	MR Egger	14	-0.103639	0.0759681	0.197531	0.901551	0.776828	1.0463	10.2839	12	0.591074	0.0127308	0.168099	0.496
27	Amyotrophic lateral sclerosis	Caspase 8 levels	90274763	|| id:ebi-a-GCST90027164	Weighted median	14	-0.0240897	0.0525135	0.646426	0.976198	0.880719	1.08203	10.2839	12	0.591074	0.0127308	0.168099	0.496
28	Amyotrophic lateral sclerosis	Caspase 8 levels	90274763	|| id:ebi-a-GCST90027164	Inverse variance weighted	14	-0.00586272	0.0364504	0.872219	0.994154	0.925607	1.06778	10.2839	12	0.591074	0.0127308	0.168099	0.496
29	Amyotrophic lateral sclerosis	Caspase 8 levels	90274763	|| id:ebi-a-GCST90027164	Simple mode	14	-0.0561534	0.0865016	0.527538	0.945394	0.79796	1.12007	10.2839	12	0.591074	0.0127308	0.168099	0.496
30	Amyotrophic lateral sclerosis	Caspase 8 levels	90274763	|| id:ebi-a-GCST90027164	Weighted mode	14	-0.0404683	0.0750751	0.598972	0.96034	0.828933	1.11258	10.2839	12	0.591074	0.0127308	0.168099	0.496
31	Amyotrophic lateral sclerosis	Eotaxin levels	90274764	|| id:ebi-a-GCST90027164	MR Egger	14	0.00644411	0.0845667	0.940514	1.00646	0.852735	1.18791	15.304	12	0.225233	0.00646771	0.516443	0.262
32	Amyotrophic lateral sclerosis	Eotaxin levels	90274764	|| id:ebi-a-GCST90027164	Weighted median	14	0.048039	0.0488233	0.325147	1.04921	0.953463	1.15458	15.304	12	0.225233	0.00646771	0.516443	0.262
33	Amyotrophic lateral sclerosis	Eotaxin levels	90274764	|| id:ebi-a-GCST90027164	Inverse variance weighted	14	0.0560503	0.0396958	0.157951	1.05765	0.978481	1.14323	15.304	12	0.225233	0.00646771	0.516443	0.262
34	Amyotrophic lateral sclerosis	Eotaxin levels	90274764	|| id:ebi-a-GCST90027164	Simple mode	14	0.043722	0.0780877	0.585061	1.04469	0.896435	1.21747	15.304	12	0.225233	0.00646771	0.516443	0.262
35	Amyotrophic lateral sclerosis	Eotaxin levels	90274764	|| id:ebi-a-GCST90027164	Weighted mode	14	0.0356803	0.0599416	0.561894	1.03632	0.921451	1.16552	15.304	12	0.225233	0.00646771	0.516443	0.262
36	Amyotrophic lateral sclerosis	C-C motif chemokine 19 levels	90274765	|| id:ebi-a-GCST90027164	MR Egger	14	0.215552	0.114797	0.0849364	1.24055	0.990595	1.55357	26.9966	12	0.00773584	-0.018131	0.191589	0.005
37	Amyotrophic lateral sclerosis	C-C motif chemokine 19 levels	90274765	|| id:ebi-a-GCST90027164	Weighted median	14	0.0301076	0.0477628	0.528462	1.03057	0.938467	1.1317	26.9966	12	0.00773584	-0.018131	0.191589	0.005
38	Amyotrophic lateral sclerosis	C-C motif chemokine 19 levels	90274765	|| id:ebi-a-GCST90027164	Inverse variance weighted	14	0.076151	0.0569657	0.181292	1.07913	0.965121	1.2066	26.9966	12	0.00773584	-0.018131	0.191589	0.005
39	Amyotrophic lateral sclerosis	C-C motif chemokine 19 levels	90274765	|| id:ebi-a-GCST90027164	Simple mode	14	0.0210454	0.0768016	0.788373	1.02127	0.878547	1.18718	26.9966	12	0.00773584	-0.018131	0.191589	0.005
40	Amyotrophic lateral sclerosis	C-C motif chemokine 19 levels	90274765	|| id:ebi-a-GCST90027164	Weighted mode	14	0.0269701	0.0590183	0.655229	1.02734	0.915115	1.15332	26.9966	12	0.00773584	-0.018131	0.191589	0.005
41	Amyotrophic lateral sclerosis	C-C motif chemokine 20 levels	90274766	|| id:ebi-a-GCST90027164	MR Egger	14	0.0624189	0.0760195	0.427606	1.06441	0.917063	1.23543	9.8839	12	0.626146	0.00292969	0.741854	0.725
42	Amyotrophic lateral sclerosis	C-C motif chemokine 20 levels	90274766	|| id:ebi-a-GCST90027164	Weighted median	14	0.0738822	0.0491908	0.133109	1.07668	0.97772	1.18566	9.8839	12	0.626146	0.00292969	0.741854	0.725
43	Amyotrophic lateral sclerosis	C-C motif chemokine 20 levels	90274766	|| id:ebi-a-GCST90027164	Inverse variance weighted	14	0.0849039	0.0364725	0.019918	1.08861	1.01351	1.16928	9.8839	12	0.626146	0.00292969	0.741854	0.725
44	Amyotrophic lateral sclerosis	C-C motif chemokine 20 levels	90274766	|| id:ebi-a-GCST90027164	Simple mode	14	0.0319906	0.0708088	0.658867	1.03251	0.89871	1.18622	9.8839	12	0.626146	0.00292969	0.741854	0.725
45	Amyotrophic lateral sclerosis	C-C motif chemokine 20 levels	90274766	|| id:ebi-a-GCST90027164	Weighted mode	14	0.0659765	0.0649603	0.32833	1.0682	0.940498	1.21325	9.8839	12	0.626146	0.00292969	0.741854	0.725
46	Amyotrophic lateral sclerosis	C-C motif chemokine 23 levels	90274767	|| id:ebi-a-GCST90027164	MR Egger	14	-0.000736785	0.114292	0.994962	0.999263	0.798717	1.25017	27.7361	12	0.00604524	-0.00214729	0.872193	0.017
47	Amyotrophic lateral sclerosis	C-C motif chemokine 23 levels	90274767	|| id:ebi-a-GCST90027164	Weighted median	14	-0.0304248	0.0492587	0.536803	0.970033	0.880758	1.06836	27.7361	12	0.00604524	-0.00214729	0.872193	0.017
48	Amyotrophic lateral sclerosis	C-C motif chemokine 23 levels	90274767	|| id:ebi-a-GCST90027164	Inverse variance weighted	14	-0.0172179	0.0527377	0.74406	0.98293	0.886403	1.08997	27.7361	12	0.00604524	-0.00214729	0.872193	0.017
49	Amyotrophic lateral sclerosis	C-C motif chemokine 23 levels	90274767	|| id:ebi-a-GCST90027164	Simple mode	14	-0.00797449	0.0856298	0.927222	0.992057	0.838778	1.17335	27.7361	12	0.00604524	-0.00214729	0.872193	0.017
50	Amyotrophic lateral sclerosis	C-C motif chemokine 23 levels	90274767	|| id:ebi-a-GCST90027164	Weighted mode	14	-0.0412096	0.0639271	0.530376	0.959628	0.846617	1.08772	27.7361	12	0.00604524	-0.00214729	0.872193	0.017
51	Amyotrophic lateral sclerosis	C-C motif chemokine 25 levels	90274768	|| id:ebi-a-GCST90027164	MR Egger	14	0.218593	0.0751611	0.013122	1.24432	1.07388	1.44182	11.4085	12	0.49427	-0.0287941	0.00573486	0.062
52	Amyotrophic lateral sclerosis	C-C motif chemokine 25 levels	90274768	|| id:ebi-a-GCST90027164	Weighted median	14	-0.015385	0.0523665	0.768915	0.984733	0.888675	1.09117	11.4085	12	0.49427	-0.0287941	0.00573486	0.062
53	Amyotrophic lateral sclerosis	C-C motif chemokine 25 levels	90274768	|| id:ebi-a-GCST90027164	Inverse variance weighted	14	-0.00273056	0.0475188	0.954177	0.997273	0.908584	1.09462	11.4085	12	0.49427	-0.0287941	0.00573486	0.062
54	Amyotrophic lateral sclerosis	C-C motif chemokine 25 levels	90274768	|| id:ebi-a-GCST90027164	Simple mode	14	-0.0315846	0.0973226	0.750696	0.968909	0.800646	1.17253	11.4085	12	0.49427	-0.0287941	0.00573486	0.062
55	Amyotrophic lateral sclerosis	C-C motif chemokine 25 levels	90274768	|| id:ebi-a-GCST90027164	Weighted mode	14	-0.043881	0.0667828	0.522599	0.957068	0.839646	1.09091	11.4085	12	0.49427	-0.0287941	0.00573486	0.062
56	Amyotrophic lateral sclerosis	C-C motif chemokine 28 levels	90274769	|| id:ebi-a-GCST90027164	MR Egger	14	0.0559365	0.0833604	0.514917	1.05753	0.898122	1.24523	15.6679	12	0.206926	-0.000186177	0.984738	0.289
57	Amyotrophic lateral sclerosis	C-C motif chemokine 28 levels	90274769	|| id:ebi-a-GCST90027164	Weighted median	14	0.056454	0.0482463	0.241953	1.05808	0.962608	1.16302	15.6679	12	0.206926	-0.000186177	0.984738	0.289
58	Amyotrophic lateral sclerosis	C-C motif chemokine 28 levels	90274769	|| id:ebi-a-GCST90027164	Inverse variance weighted	14	0.054507	0.0383434	0.155158	1.05602	0.979565	1.13844	15.6679	12	0.206926	-0.000186177	0.984738	0.289
59	Amyotrophic lateral sclerosis	C-C motif chemokine 28 levels	90274769	|| id:ebi-a-GCST90027164	Simple mode	14	0.0277645	0.0714804	0.703991	1.02815	0.893743	1.18278	15.6679	12	0.206926	-0.000186177	0.984738	0.289
60	Amyotrophic lateral sclerosis	C-C motif chemokine 28 levels	90274769	|| id:ebi-a-GCST90027164	Weighted mode	14	0.0421045	0.0586307	0.485383	1.043	0.929776	1.17002	15.6679	12	0.206926	-0.000186177	0.984738	0.289
61	Amyotrophic lateral sclerosis	C-C motif chemokine 4 levels	90274770	|| id:ebi-a-GCST90027164	MR Egger	14	-0.128821	0.0764583	0.117826	0.879132	0.756783	1.02126	9.82506	12	0.631305	0.0119289	0.197164	0.555
62	Amyotrophic lateral sclerosis	C-C motif chemokine 4 levels	90274770	|| id:ebi-a-GCST90027164	Weighted median	14	-0.0619359	0.0506581	0.221471	0.939943	0.8511	1.03806	9.82506	12	0.631305	0.0119289	0.197164	0.555
63	Amyotrophic lateral sclerosis	C-C motif chemokine 4 levels	90274770	|| id:ebi-a-GCST90027164	Inverse variance weighted	14	-0.0371424	0.0365769	0.309886	0.963539	0.89688	1.03515	9.82506	12	0.631305	0.0119289	0.197164	0.555
64	Amyotrophic lateral sclerosis	C-C motif chemokine 4 levels	90274770	|| id:ebi-a-GCST90027164	Simple mode	14	-0.114905	0.0867012	0.207893	0.891451	0.752135	1.05657	9.82506	12	0.631305	0.0119289	0.197164	0.555
65	Amyotrophic lateral sclerosis	C-C motif chemokine 4 levels	90274770	|| id:ebi-a-GCST90027164	Weighted mode	14	-0.0816849	0.0691632	0.258741	0.921562	0.804733	1.05535	9.82506	12	0.631305	0.0119289	0.197164	0.555
66	Amyotrophic lateral sclerosis	Natural killer cell receptor 2B4 levels	90274771	|| id:ebi-a-GCST90027164	MR Egger	14	-0.0506455	0.0947111	0.602599	0.950616	0.78956	1.14452	19.0188	12	0.0880761	0.0116174	0.304111	0.07
67	Amyotrophic lateral sclerosis	Natural killer cell receptor 2B4 levels	90274771	|| id:ebi-a-GCST90027164	Weighted median	14	0.0443139	0.0545469	0.416563	1.04531	0.939321	1.16326	19.0188	12	0.0880761	0.0116174	0.304111	0.07
68	Amyotrophic lateral sclerosis	Natural killer cell receptor 2B4 levels	90274771	|| id:ebi-a-GCST90027164	Inverse variance weighted	14	0.0386469	0.0455748	0.396444	1.0394	0.950583	1.13652	19.0188	12	0.0880761	0.0116174	0.304111	0.07
69	Amyotrophic lateral sclerosis	Natural killer cell receptor 2B4 levels	90274771	|| id:ebi-a-GCST90027164	Simple mode	14	0.0767874	0.0935026	0.426318	1.07981	0.898995	1.297	19.0188	12	0.0880761	0.0116174	0.304111	0.07
70	Amyotrophic lateral sclerosis	Natural killer cell receptor 2B4 levels	90274771	|| id:ebi-a-GCST90027164	Weighted mode	14	0.0524544	0.0824109	0.535499	1.05385	0.896667	1.2386	19.0188	12	0.0880761	0.0116174	0.304111	0.07
71	Amyotrophic lateral sclerosis	CD40L receptor levels	90274772	|| id:ebi-a-GCST90027164	MR Egger	14	0.0920017	0.0788002	0.265672	1.09637	0.939463	1.27948	13.6335	12	0.324723	-0.00832682	0.373205	0.344
72	Amyotrophic lateral sclerosis	CD40L receptor levels	90274772	|| id:ebi-a-GCST90027164	Weighted median	14	0.0669195	0.0501525	0.182099	1.06921	0.969108	1.17965	13.6335	12	0.324723	-0.00832682	0.373205	0.344
73	Amyotrophic lateral sclerosis	CD40L receptor levels	90274772	|| id:ebi-a-GCST90027164	Inverse variance weighted	14	0.0279654	0.0374292	0.454969	1.02836	0.955619	1.10664	13.6335	12	0.324723	-0.00832682	0.373205	0.344
74	Amyotrophic lateral sclerosis	CD40L receptor levels	90274772	|| id:ebi-a-GCST90027164	Simple mode	14	0.0864593	0.0891337	0.34975	1.09031	0.915539	1.29844	13.6335	12	0.324723	-0.00832682	0.373205	0.344
75	Amyotrophic lateral sclerosis	CD40L receptor levels	90274772	|| id:ebi-a-GCST90027164	Weighted mode	14	0.0823423	0.0856897	0.354118	1.08583	0.917953	1.2844	13.6335	12	0.324723	-0.00832682	0.373205	0.344
76	Amyotrophic lateral sclerosis	T-cell surface glycoprotein CD5 levels	90274773	|| id:ebi-a-GCST90027164	MR Egger	14	0.00489413	0.0850065	0.955036	1.00491	0.850681	1.18709	15.4692	12	0.216772	0.00212863	0.830038	0.188
77	Amyotrophic lateral sclerosis	T-cell surface glycoprotein CD5 levels	90274773	|| id:ebi-a-GCST90027164	Weighted median	14	0.03419	0.0546848	0.531827	1.03478	0.929608	1.15185	15.4692	12	0.216772	0.00212863	0.830038	0.188
78	Amyotrophic lateral sclerosis	T-cell surface glycoprotein CD5 levels	90274773	|| id:ebi-a-GCST90027164	Inverse variance weighted	14	0.0212747	0.0391174	0.586532	1.0215	0.946111	1.1029	15.4692	12	0.216772	0.00212863	0.830038	0.188
79	Amyotrophic lateral sclerosis	T-cell surface glycoprotein CD5 levels	90274773	|| id:ebi-a-GCST90027164	Simple mode	14	0.075649	0.0899227	0.415406	1.07858	0.904295	1.28646	15.4692	12	0.216772	0.00212863	0.830038	0.188
80	Amyotrophic lateral sclerosis	T-cell surface glycoprotein CD5 levels	90274773	|| id:ebi-a-GCST90027164	Weighted mode	14	0.0529745	0.110204	0.638722	1.0544	0.84957	1.30862	15.4692	12	0.216772	0.00212863	0.830038	0.188
81	Amyotrophic lateral sclerosis	T-cell surface glycoprotein CD6 isoform levels	90274774	|| id:ebi-a-GCST90027164	MR Egger	14	-0.0244254	0.0934584	0.798254	0.975871	0.812529	1.17205	18.378	12	0.104686	0.00900871	0.415178	0.103
82	Amyotrophic lateral sclerosis	T-cell surface glycoprotein CD6 isoform levels	90274774	|| id:ebi-a-GCST90027164	Weighted median	14	0.037633	0.0548655	0.492767	1.03835	0.932484	1.15624	18.378	12	0.104686	0.00900871	0.415178	0.103
83	Amyotrophic lateral sclerosis	T-cell surface glycoprotein CD6 isoform levels	90274774	|| id:ebi-a-GCST90027164	Inverse variance weighted	14	0.0447971	0.0443085	0.312004	1.04582	0.958824	1.1407	18.378	12	0.104686	0.00900871	0.415178	0.103
84	Amyotrophic lateral sclerosis	T-cell surface glycoprotein CD6 isoform levels	90274774	|| id:ebi-a-GCST90027164	Simple mode	14	0.0498902	0.105954	0.645538	1.05116	0.854039	1.29377	18.378	12	0.104686	0.00900871	0.415178	0.103
85	Amyotrophic lateral sclerosis	T-cell surface glycoprotein CD6 isoform levels	90274774	|| id:ebi-a-GCST90027164	Weighted mode	14	-0.0366762	0.101729	0.724242	0.963988	0.789729	1.1767	18.378	12	0.104686	0.00900871	0.415178	0.103
86	Amyotrophic lateral sclerosis	CUB domain-containing protein 1 levels	90274775	|| id:ebi-a-GCST90027164	MR Egger	14	0.0227229	0.102971	0.829057	1.02298	0.836022	1.25175	23.7168	12	0.0222215	-0.00495054	0.681376	0.036
87	Amyotrophic lateral sclerosis	CUB domain-containing protein 1 levels	90274775	|| id:ebi-a-GCST90027164	Weighted median	14	-0.0407411	0.0579799	0.482257	0.960078	0.856945	1.07562	23.7168	12	0.0222215	-0.00495054	0.681376	0.036
88	Amyotrophic lateral sclerosis	CUB domain-containing protein 1 levels	90274775	|| id:ebi-a-GCST90027164	Inverse variance weighted	14	-0.0153097	0.0477306	0.748397	0.984807	0.896854	1.08138	23.7168	12	0.0222215	-0.00495054	0.681376	0.036
89	Amyotrophic lateral sclerosis	CUB domain-containing protein 1 levels	90274775	|| id:ebi-a-GCST90027164	Simple mode	14	0.121773	0.136621	0.388957	1.1295	0.864154	1.47632	23.7168	12	0.0222215	-0.00495054	0.681376	0.036
90	Amyotrophic lateral sclerosis	CUB domain-containing protein 1 levels	90274775	|| id:ebi-a-GCST90027164	Weighted mode	14	0.12646	0.122102	0.319229	1.1348	0.893275	1.44164	23.7168	12	0.0222215	-0.00495054	0.681376	0.036
91	Amyotrophic lateral sclerosis	Macrophage colony-stimulating factor 1 levels	90274776	|| id:ebi-a-GCST90027164	MR Egger	14	0.116069	0.0985278	0.261619	1.12307	0.925847	1.36231	21.0479	12	0.049684	-0.0105181	0.367853	0.04
92	Amyotrophic lateral sclerosis	Macrophage colony-stimulating factor 1 levels	90274776	|| id:ebi-a-GCST90027164	Weighted median	14	0.0253166	0.055214	0.64658	1.02564	0.920441	1.14286	21.0479	12	0.049684	-0.0105181	0.367853	0.04
93	Amyotrophic lateral sclerosis	Macrophage colony-stimulating factor 1 levels	90274776	|| id:ebi-a-GCST90027164	Inverse variance weighted	14	0.0350105	0.046722	0.453655	1.03563	0.945005	1.13495	21.0479	12	0.049684	-0.0105181	0.367853	0.04
94	Amyotrophic lateral sclerosis	Macrophage colony-stimulating factor 1 levels	90274776	|| id:ebi-a-GCST90027164	Simple mode	14	0.0526373	0.112584	0.647855	1.05405	0.845331	1.3143	21.0479	12	0.049684	-0.0105181	0.367853	0.04
95	Amyotrophic lateral sclerosis	Macrophage colony-stimulating factor 1 levels	90274776	|| id:ebi-a-GCST90027164	Weighted mode	14	0.0253802	0.106055	0.814596	1.0257	0.833195	1.2627	21.0479	12	0.049684	-0.0105181	0.367853	0.04
96	Amyotrophic lateral sclerosis	Cystatin D levels	90274777	|| id:ebi-a-GCST90027164	MR Egger	14	-0.00367157	0.0744515	0.96148	0.996335	0.861055	1.15287	9.78304	12	0.634988	0.00290867	0.738226	0.653
97	Amyotrophic lateral sclerosis	Cystatin D levels	90274777	|| id:ebi-a-GCST90027164	Weighted median	14	0.00440846	0.0501317	0.929926	1.00442	0.91042	1.10812	9.78304	12	0.634988	0.00290867	0.738226	0.653
98	Amyotrophic lateral sclerosis	Cystatin D levels	90274777	|| id:ebi-a-GCST90027164	Inverse variance weighted	14	0.0186783	0.0356888	0.600719	1.01885	0.950021	1.09267	9.78304	12	0.634988	0.00290867	0.738226	0.653
99	Amyotrophic lateral sclerosis	Cystatin D levels	90274777	|| id:ebi-a-GCST90027164	Simple mode	14	0.00636292	0.0800192	0.937832	1.00638	0.860299	1.17727	9.78304	12	0.634988	0.00290867	0.738226	0.653
100	Amyotrophic lateral sclerosis	Cystatin D levels	90274777	|| id:ebi-a-GCST90027164	Weighted mode	14	-0.00969505	0.0698551	0.891745	0.990352	0.86363	1.13567	9.78304	12	0.634988	0.00290867	0.738226	0.653
101	Amyotrophic lateral sclerosis	Fractalkine levels	90274778	|| id:ebi-a-GCST90027164	MR Egger	14	0.0498187	0.0957281	0.612239	1.05108	0.871266	1.26801	19.4063	12	0.0791827	-0.00502417	0.653522	0.103
102	Amyotrophic lateral sclerosis	Fractalkine levels	90274778	|| id:ebi-a-GCST90027164	Weighted median	14	0.0149866	0.0539137	0.781033	1.0151	0.913306	1.12824	19.4063	12	0.0791827	-0.00502417	0.653522	0.103
103	Amyotrophic lateral sclerosis	Fractalkine levels	90274778	|| id:ebi-a-GCST90027164	Inverse variance weighted	14	0.0110762	0.0442024	0.80214	1.01114	0.927224	1.10265	19.4063	12	0.0791827	-0.00502417	0.653522	0.103
104	Amyotrophic lateral sclerosis	Fractalkine levels	90274778	|| id:ebi-a-GCST90027164	Simple mode	14	0.0251397	0.108891	0.82101	1.02546	0.828376	1.26943	19.4063	12	0.0791827	-0.00502417	0.653522	0.103
105	Amyotrophic lateral sclerosis	Fractalkine levels	90274778	|| id:ebi-a-GCST90027164	Weighted mode	14	-0.0250039	0.0754968	0.745778	0.975306	0.841156	1.13085	19.4063	12	0.0791827	-0.00502417	0.653522	0.103
106	Amyotrophic lateral sclerosis	C-X-C motif chemokine 1 levels	90274779	|| id:ebi-a-GCST90027164	MR Egger	14	-0.0818673	0.0891146	0.376362	0.921394	0.77373	1.09724	16.4901	12	0.169805	0.00908773	0.389469	0.182
107	Amyotrophic lateral sclerosis	C-X-C motif chemokine 1 levels	90274779	|| id:ebi-a-GCST90027164	Weighted median	14	-0.00116337	0.0512687	0.981896	0.998837	0.903346	1.10442	16.4901	12	0.169805	0.00908773	0.389469	0.182
108	Amyotrophic lateral sclerosis	C-X-C motif chemokine 1 levels	90274779	|| id:ebi-a-GCST90027164	Inverse variance weighted	14	-0.0120062	0.0423243	0.776663	0.988066	0.909408	1.07353	16.4901	12	0.169805	0.00908773	0.389469	0.182
109	Amyotrophic lateral sclerosis	C-X-C motif chemokine 1 levels	90274779	|| id:ebi-a-GCST90027164	Simple mode	14	-0.00494759	0.0963427	0.959824	0.995065	0.82384	1.20188	16.4901	12	0.169805	0.00908773	0.389469	0.182
110	Amyotrophic lateral sclerosis	C-X-C motif chemokine 1 levels	90274779	|| id:ebi-a-GCST90027164	Weighted mode	14	-0.025265	0.0735116	0.736577	0.975052	0.844215	1.12616	16.4901	12	0.169805	0.00908773	0.389469	0.182
111	Amyotrophic lateral sclerosis	C-X-C motif chemokine 10 levels	90274780	|| id:ebi-a-GCST90027164	MR Egger	14	0.0140362	0.103172	0.89404	1.01414	0.828465	1.24142	22.4132	12	0.0331411	-0.00186777	0.876853	0.065
112	Amyotrophic lateral sclerosis	C-X-C motif chemokine 10 levels	90274780	|| id:ebi-a-GCST90027164	Weighted median	14	-0.0493165	0.0542167	0.363024	0.95188	0.855917	1.0586	22.4132	12	0.0331411	-0.00186777	0.876853	0.065
113	Amyotrophic lateral sclerosis	C-X-C motif chemokine 10 levels	90274780	|| id:ebi-a-GCST90027164	Inverse variance weighted	14	-0.000292466	0.0476185	0.9951	0.999708	0.910624	1.09751	22.4132	12	0.0331411	-0.00186777	0.876853	0.065
114	Amyotrophic lateral sclerosis	C-X-C motif chemokine 10 levels	90274780	|| id:ebi-a-GCST90027164	Simple mode	14	-0.0948917	0.0746872	0.226166	0.909471	0.785623	1.05284	22.4132	12	0.0331411	-0.00186777	0.876853	0.065
115	Amyotrophic lateral sclerosis	C-X-C motif chemokine 10 levels	90274780	|| id:ebi-a-GCST90027164	Weighted mode	14	-0.0710487	0.0587294	0.24791	0.931417	0.830142	1.04505	22.4132	12	0.0331411	-0.00186777	0.876853	0.065
116	Amyotrophic lateral sclerosis	C-X-C motif chemokine 11 levels	90274781	|| id:ebi-a-GCST90027164	MR Egger	14	0.00240509	0.0983849	0.980899	1.00241	0.826604	1.2156	20.1196	12	0.0648569	0.00612151	0.595841	0.115
117	Amyotrophic lateral sclerosis	C-X-C motif chemokine 11 levels	90274781	|| id:ebi-a-GCST90027164	Weighted median	14	0.0101771	0.0528861	0.847403	1.01023	0.910756	1.12057	20.1196	12	0.0648569	0.00612151	0.595841	0.115
118	Amyotrophic lateral sclerosis	C-X-C motif chemokine 11 levels	90274781	|| id:ebi-a-GCST90027164	Inverse variance weighted	14	0.0494451	0.0458828	0.281195	1.05069	0.960323	1.14956	20.1196	12	0.0648569	0.00612151	0.595841	0.115
119	Amyotrophic lateral sclerosis	C-X-C motif chemokine 11 levels	90274781	|| id:ebi-a-GCST90027164	Simple mode	14	-0.0364957	0.0873102	0.682769	0.964162	0.812513	1.14412	20.1196	12	0.0648569	0.00612151	0.595841	0.115
120	Amyotrophic lateral sclerosis	C-X-C motif chemokine 11 levels	90274781	|| id:ebi-a-GCST90027164	Weighted mode	14	0.0196393	0.0619942	0.756431	1.01983	0.903148	1.15159	20.1196	12	0.0648569	0.00612151	0.595841	0.115
121	Amyotrophic lateral sclerosis	C-X-C motif chemokine 5 levels	90274782	|| id:ebi-a-GCST90027164	MR Egger	14	-0.105469	0.0919094	0.273524	0.899902	0.751554	1.07753	17.3431	12	0.137141	0.0138269	0.212156	0.099
122	Amyotrophic lateral sclerosis	C-X-C motif chemokine 5 levels	90274782	|| id:ebi-a-GCST90027164	Weighted median	14	-0.0344443	0.0519643	0.507429	0.966142	0.872586	1.06973	17.3431	12	0.137141	0.0138269	0.212156	0.099
123	Amyotrophic lateral sclerosis	C-X-C motif chemokine 5 levels	90274782	|| id:ebi-a-GCST90027164	Inverse variance weighted	14	0.000911283	0.045174	0.983906	1.00091	0.9161	1.09358	17.3431	12	0.137141	0.0138269	0.212156	0.099
124	Amyotrophic lateral sclerosis	C-X-C motif chemokine 5 levels	90274782	|| id:ebi-a-GCST90027164	Simple mode	14	0.0016054	0.093025	0.986493	1.00161	0.834666	1.20194	17.3431	12	0.137141	0.0138269	0.212156	0.099
125	Amyotrophic lateral sclerosis	C-X-C motif chemokine 5 levels	90274782	|| id:ebi-a-GCST90027164	Weighted mode	14	-0.0509799	0.065231	0.448491	0.950298	0.836246	1.0799	17.3431	12	0.137141	0.0138269	0.212156	0.099
126	Amyotrophic lateral sclerosis	C-X-C motif chemokine 6 levels	90274783	|| id:ebi-a-GCST90027164	MR Egger	14	-0.00898953	0.0865674	0.919008	0.991051	0.836389	1.17431	15.4152	12	0.219509	0.00620727	0.541896	0.324
127	Amyotrophic lateral sclerosis	C-X-C motif chemokine 6 levels	90274783	|| id:ebi-a-GCST90027164	Weighted median	14	0.011498	0.0515012	0.823335	1.01156	0.914439	1.11901	15.4152	12	0.219509	0.00620727	0.541896	0.324
128	Amyotrophic lateral sclerosis	C-X-C motif chemokine 6 levels	90274783	|| id:ebi-a-GCST90027164	Inverse variance weighted	14	0.0387293	0.0404537	0.338378	1.03949	0.960252	1.12527	15.4152	12	0.219509	0.00620727	0.541896	0.324
129	Amyotrophic lateral sclerosis	C-X-C motif chemokine 6 levels	90274783	|| id:ebi-a-GCST90027164	Simple mode	14	-0.0406819	0.0763283	0.603036	0.960135	0.826723	1.11507	15.4152	12	0.219509	0.00620727	0.541896	0.324
130	Amyotrophic lateral sclerosis	C-X-C motif chemokine 6 levels	90274783	|| id:ebi-a-GCST90027164	Weighted mode	14	-0.00935769	0.0628394	0.883906	0.990686	0.875883	1.12054	15.4152	12	0.219509	0.00620727	0.541896	0.324
131	Amyotrophic lateral sclerosis	C-X-C motif chemokine 9 levels	90274784	|| id:ebi-a-GCST90027164	MR Egger	14	0.139002	0.0783883	0.101546	1.14913	0.985467	1.33996	13.8274	12	0.311864	-0.014682	0.127417	0.244
132	Amyotrophic lateral sclerosis	C-X-C motif chemokine 9 levels	90274784	|| id:ebi-a-GCST90027164	Weighted median	14	0.027536	0.0532093	0.604805	1.02792	0.926117	1.14091	13.8274	12	0.311864	-0.014682	0.127417	0.244
133	Amyotrophic lateral sclerosis	C-X-C motif chemokine 9 levels	90274784	|| id:ebi-a-GCST90027164	Inverse variance weighted	14	0.0264352	0.0400522	0.509242	1.02679	0.949265	1.11064	13.8274	12	0.311864	-0.014682	0.127417	0.244
134	Amyotrophic lateral sclerosis	C-X-C motif chemokine 9 levels	90274784	|| id:ebi-a-GCST90027164	Simple mode	14	0.00355982	0.0806911	0.965482	1.00357	0.856762	1.17552	13.8274	12	0.311864	-0.014682	0.127417	0.244
135	Amyotrophic lateral sclerosis	C-X-C motif chemokine 9 levels	90274784	|| id:ebi-a-GCST90027164	Weighted mode	14	0.0188054	0.0648568	0.776426	1.01898	0.897346	1.15711	13.8274	12	0.311864	-0.014682	0.127417	0.244
136	Amyotrophic lateral sclerosis	Delta and Notch-like epidermal growth factor-related receptor levels	90274785	|| id:ebi-a-GCST90027164	MR Egger	14	-0.0677092	0.0750482	0.384697	0.934532	0.8067	1.08262	12.4581	12	0.409627	0.012262	0.178676	0.322
137	Amyotrophic lateral sclerosis	Delta and Notch-like epidermal growth factor-related receptor levels	90274785	|| id:ebi-a-GCST90027164	Weighted median	14	-0.00912515	0.0475473	0.847807	0.990916	0.902743	1.0877	12.4581	12	0.409627	0.012262	0.178676	0.322
138	Amyotrophic lateral sclerosis	Delta and Notch-like epidermal growth factor-related receptor levels	90274785	|| id:ebi-a-GCST90027164	Inverse variance weighted	14	0.0263704	0.0373899	0.480636	1.02672	0.95417	1.10479	12.4581	12	0.409627	0.012262	0.178676	0.322
139	Amyotrophic lateral sclerosis	Delta and Notch-like epidermal growth factor-related receptor levels	90274785	|| id:ebi-a-GCST90027164	Simple mode	14	-0.0112859	0.0746304	0.882121	0.988778	0.854224	1.14453	12.4581	12	0.409627	0.012262	0.178676	0.322
140	Amyotrophic lateral sclerosis	Delta and Notch-like epidermal growth factor-related receptor levels	90274785	|| id:ebi-a-GCST90027164	Weighted mode	14	-0.0347037	0.0582198	0.561357	0.965892	0.861729	1.08265	12.4581	12	0.409627	0.012262	0.178676	0.322
141	Amyotrophic lateral sclerosis	Protein S100-A12 levels	90274786	|| id:ebi-a-GCST90027164	MR Egger	14	-0.126072	0.0761932	0.123898	0.881552	0.75926	1.02354	4.82139	12	0.96368	0.0116028	0.207435	0.917
142	Amyotrophic lateral sclerosis	Protein S100-A12 levels	90274786	|| id:ebi-a-GCST90027164	Weighted median	14	-0.0629701	0.0480042	0.1896	0.938972	0.854654	1.03161	4.82139	12	0.96368	0.0116028	0.207435	0.917
143	Amyotrophic lateral sclerosis	Protein S100-A12 levels	90274786	|| id:ebi-a-GCST90027164	Inverse variance weighted	14	-0.0369594	0.0365136	0.311438	0.963715	0.897155	1.03521	4.82139	12	0.96368	0.0116028	0.207435	0.917
144	Amyotrophic lateral sclerosis	Protein S100-A12 levels	90274786	|| id:ebi-a-GCST90027164	Simple mode	14	-0.0363713	0.0799511	0.656671	0.964282	0.82442	1.12787	4.82139	12	0.96368	0.0116028	0.207435	0.917
145	Amyotrophic lateral sclerosis	Protein S100-A12 levels	90274786	|| id:ebi-a-GCST90027164	Weighted mode	14	-0.0805107	0.069143	0.265183	0.922645	0.80571	1.05655	4.82139	12	0.96368	0.0116028	0.207435	0.917
146	Amyotrophic lateral sclerosis	Fibroblast growth factor 19 levels	90274787	|| id:ebi-a-GCST90027164	MR Egger	14	0.0432248	0.0768756	0.584283	1.04417	0.89812	1.21398	11.2354	12	0.508862	-0.00407261	0.650272	0.602
147	Amyotrophic lateral sclerosis	Fibroblast growth factor 19 levels	90274787	|| id:ebi-a-GCST90027164	Weighted median	14	0.0428813	0.0522164	0.41152	1.04381	0.942271	1.1563	11.2354	12	0.508862	-0.00407261	0.650272	0.602
148	Amyotrophic lateral sclerosis	Fibroblast growth factor 19 levels	90274787	|| id:ebi-a-GCST90027164	Inverse variance weighted	14	0.0118228	0.036728	0.747527	1.01189	0.94161	1.08742	11.2354	12	0.508862	-0.00407261	0.650272	0.602
149	Amyotrophic lateral sclerosis	Fibroblast growth factor 19 levels	90274787	|| id:ebi-a-GCST90027164	Simple mode	14	-0.0929974	0.0819231	0.276797	0.911196	0.776028	1.06991	11.2354	12	0.508862	-0.00407261	0.650272	0.602
150	Amyotrophic lateral sclerosis	Fibroblast growth factor 19 levels	90274787	|| id:ebi-a-GCST90027164	Weighted mode	14	0.0476527	0.0653505	0.47882	1.04881	0.922716	1.19213	11.2354	12	0.508862	-0.00407261	0.650272	0.602
151	Amyotrophic lateral sclerosis	Fibroblast growth factor 21 levels	90274788	|| id:ebi-a-GCST90027164	MR Egger	14	0.0120798	0.0837098	0.887655	1.01215	0.858996	1.19262	14.3592	12	0.278361	-0.000423569	0.965358	0.359
152	Amyotrophic lateral sclerosis	Fibroblast growth factor 21 levels	90274788	|| id:ebi-a-GCST90027164	Weighted median	14	0.0595653	0.0504964	0.238161	1.06138	0.961359	1.1718	14.3592	12	0.278361	-0.000423569	0.965358	0.359
153	Amyotrophic lateral sclerosis	Fibroblast growth factor 21 levels	90274788	|| id:ebi-a-GCST90027164	Inverse variance weighted	14	0.00882156	0.0385445	0.818972	1.00886	0.935452	1.08803	14.3592	12	0.278361	-0.000423569	0.965358	0.359
154	Amyotrophic lateral sclerosis	Fibroblast growth factor 21 levels	90274788	|| id:ebi-a-GCST90027164	Simple mode	14	0.0929623	0.080383	0.268291	1.09742	0.937453	1.28468	14.3592	12	0.278361	-0.000423569	0.965358	0.359
155	Amyotrophic lateral sclerosis	Fibroblast growth factor 21 levels	90274788	|| id:ebi-a-GCST90027164	Weighted mode	14	0.0854778	0.0661904	0.219058	1.08924	0.95671	1.24012	14.3592	12	0.278361	-0.000423569	0.965358	0.359
156	Amyotrophic lateral sclerosis	Fibroblast growth factor 23 levels	90274789	|| id:ebi-a-GCST90027164	MR Egger	14	0.00745448	0.07868	0.926082	1.00748	0.863503	1.17547	13.4717	12	0.335707	0.00175805	0.848082	0.366
157	Amyotrophic lateral sclerosis	Fibroblast growth factor 23 levels	90274789	|| id:ebi-a-GCST90027164	Weighted median	14	-0.00417315	0.0518136	0.935807	0.995836	0.89967	1.10228	13.4717	12	0.335707	0.00175805	0.848082	0.366
158	Amyotrophic lateral sclerosis	Fibroblast growth factor 23 levels	90274789	|| id:ebi-a-GCST90027164	Inverse variance weighted	14	0.0209963	0.0360671	0.560469	1.02122	0.951519	1.09602	13.4717	12	0.335707	0.00175805	0.848082	0.366
159	Amyotrophic lateral sclerosis	Fibroblast growth factor 23 levels	90274789	|| id:ebi-a-GCST90027164	Simple mode	14	-0.0641724	0.0975009	0.521913	0.937843	0.774704	1.13534	13.4717	12	0.335707	0.00175805	0.848082	0.366
160	Amyotrophic lateral sclerosis	Fibroblast growth factor 23 levels	90274789	|| id:ebi-a-GCST90027164	Weighted mode	14	-0.0736717	0.0820942	0.385822	0.928977	0.790906	1.09115	13.4717	12	0.335707	0.00175805	0.848082	0.366
161	Amyotrophic lateral sclerosis	Fibroblast growth factor 5 levels	90274790	|| id:ebi-a-GCST90027164	MR Egger	14	0.00318498	0.09256	0.973116	1.00319	0.836748	1.20274	15.3252	12	0.224132	0.00212348	0.844755	0.313
162	Amyotrophic lateral sclerosis	Fibroblast growth factor 5 levels	90274790	|| id:ebi-a-GCST90027164	Weighted median	14	-0.0128662	0.055284	0.815972	0.987216	0.885836	1.1002	15.3252	12	0.224132	0.00212348	0.844755	0.313
163	Amyotrophic lateral sclerosis	Fibroblast growth factor 5 levels	90274790	|| id:ebi-a-GCST90027164	Inverse variance weighted	14	0.019459	0.0425267	0.64726	1.01965	0.938105	1.10828	15.3252	12	0.224132	0.00212348	0.844755	0.313
164	Amyotrophic lateral sclerosis	Fibroblast growth factor 5 levels	90274790	|| id:ebi-a-GCST90027164	Simple mode	14	-0.0424341	0.089837	0.644511	0.958454	0.803712	1.14299	15.3252	12	0.224132	0.00212348	0.844755	0.313
165	Amyotrophic lateral sclerosis	Fibroblast growth factor 5 levels	90274790	|| id:ebi-a-GCST90027164	Weighted mode	14	-0.0469033	0.0671766	0.497347	0.95418	0.836466	1.08846	15.3252	12	0.224132	0.00212348	0.844755	0.313
166	Amyotrophic lateral sclerosis	Fms-related tyrosine kinase 3 ligand levels	90274791	|| id:ebi-a-GCST90027164	MR Egger	14	-0.00256463	0.0871024	0.976995	0.997439	0.840898	1.18312	15.8941	12	0.196133	-0.00147105	0.884844	0.236
167	Amyotrophic lateral sclerosis	Fms-related tyrosine kinase 3 ligand levels	90274791	|| id:ebi-a-GCST90027164	Weighted median	14	-0.0381843	0.0536597	0.476712	0.962536	0.866444	1.06928	15.8941	12	0.196133	-0.00147105	0.884844	0.236
168	Amyotrophic lateral sclerosis	Fms-related tyrosine kinase 3 ligand levels	90274791	|| id:ebi-a-GCST90027164	Inverse variance weighted	14	-0.0138801	0.0400784	0.7291	0.986216	0.91171	1.06681	15.8941	12	0.196133	-0.00147105	0.884844	0.236
169	Amyotrophic lateral sclerosis	Fms-related tyrosine kinase 3 ligand levels	90274791	|| id:ebi-a-GCST90027164	Simple mode	14	-0.0527631	0.0921959	0.576887	0.948605	0.791784	1.13649	15.8941	12	0.196133	-0.00147105	0.884844	0.236
170	Amyotrophic lateral sclerosis	Fms-related tyrosine kinase 3 ligand levels	90274791	|| id:ebi-a-GCST90027164	Weighted mode	14	-0.0041169	0.0961319	0.966491	0.995892	0.824865	1.20238	15.8941	12	0.196133	-0.00147105	0.884844	0.236
171	Amyotrophic lateral sclerosis	Glial cell line-derived neurotrophic factor levels	90274792	|| id:ebi-a-GCST90027164	MR Egger	14	0.0413021	0.0749333	0.591622	1.04217	0.899814	1.20704	11.6831	12	0.471455	0.00290729	0.739732	0.568
172	Amyotrophic lateral sclerosis	Glial cell line-derived neurotrophic factor levels	90274792	|| id:ebi-a-GCST90027164	Weighted median	14	0.0263674	0.0498625	0.596943	1.02672	0.931124	1.13213	11.6831	12	0.471455	0.00290729	0.739732	0.568
173	Amyotrophic lateral sclerosis	Glial cell line-derived neurotrophic factor levels	90274792	|| id:ebi-a-GCST90027164	Inverse variance weighted	14	0.0636863	0.0357871	0.0751438	1.06576	0.993564	1.1432	11.6831	12	0.471455	0.00290729	0.739732	0.568
174	Amyotrophic lateral sclerosis	Glial cell line-derived neurotrophic factor levels	90274792	|| id:ebi-a-GCST90027164	Simple mode	14	0.0118456	0.084364	0.890488	1.01192	0.857694	1.19387	11.6831	12	0.471455	0.00290729	0.739732	0.568
175	Amyotrophic lateral sclerosis	Glial cell line-derived neurotrophic factor levels	90274792	|| id:ebi-a-GCST90027164	Weighted mode	14	0.0339892	0.0620868	0.593346	1.03457	0.916035	1.16845	11.6831	12	0.471455	0.00290729	0.739732	0.568
176	Amyotrophic lateral sclerosis	Hepatocyte growth factor levels	90274793	|| id:ebi-a-GCST90027164	MR Egger	14	-0.0213752	0.0880166	0.81222	0.978852	0.82375	1.16316	16.8834	12	0.154034	0.00466966	0.651089	0.185
177	Amyotrophic lateral sclerosis	Hepatocyte growth factor levels	90274793	|| id:ebi-a-GCST90027164	Weighted median	14	-0.00264532	0.049395	0.95729	0.997358	0.905327	1.09875	16.8834	12	0.154034	0.00466966	0.651089	0.185
178	Amyotrophic lateral sclerosis	Hepatocyte growth factor levels	90274793	|| id:ebi-a-GCST90027164	Inverse variance weighted	14	0.0144372	0.0409521	0.724435	1.01454	0.936291	1.09933	16.8834	12	0.154034	0.00466966	0.651089	0.185
179	Amyotrophic lateral sclerosis	Hepatocyte growth factor levels	90274793	|| id:ebi-a-GCST90027164	Simple mode	14	-0.00764968	0.0778623	0.923235	0.99238	0.851922	1.15599	16.8834	12	0.154034	0.00466966	0.651089	0.185
180	Amyotrophic lateral sclerosis	Hepatocyte growth factor levels	90274793	|| id:ebi-a-GCST90027164	Weighted mode	14	-0.0226444	0.0676559	0.74319	0.97761	0.856201	1.11623	16.8834	12	0.154034	0.00466966	0.651089	0.185
181	Amyotrophic lateral sclerosis	Interferon gamma levels	90274794	|| id:ebi-a-GCST90027164	MR Egger	14	-0.07983	0.0878291	0.381283	0.923273	0.777264	1.09671	13.2906	12	0.348279	0.0112641	0.284567	0.304
182	Amyotrophic lateral sclerosis	Interferon gamma levels	90274794	|| id:ebi-a-GCST90027164	Weighted median	14	0.0128017	0.0565706	0.820971	1.01288	0.906579	1.13165	13.2906	12	0.348279	0.0112641	0.284567	0.304
183	Amyotrophic lateral sclerosis	Interferon gamma levels	90274794	|| id:ebi-a-GCST90027164	Inverse variance weighted	14	0.00657218	0.0424126	0.876854	1.00659	0.926301	1.09385	13.2906	12	0.348279	0.0112641	0.284567	0.304
184	Amyotrophic lateral sclerosis	Interferon gamma levels	90274794	|| id:ebi-a-GCST90027164	Simple mode	14	0.0435666	0.0975705	0.662574	1.04453	0.862714	1.26466	13.2906	12	0.348279	0.0112641	0.284567	0.304
185	Amyotrophic lateral sclerosis	Interferon gamma levels	90274794	|| id:ebi-a-GCST90027164	Weighted mode	14	-0.00505996	0.0746759	0.947009	0.994953	0.859483	1.15178	13.2906	12	0.348279	0.0112641	0.284567	0.304
186	Amyotrophic lateral sclerosis	Interleukin-10 levels	90274795	|| id:ebi-a-GCST90027164	MR Egger	14	0.179687	0.101119	0.100903	1.19684	0.981664	1.45919	21.1808	12	0.0477941	-0.0187232	0.130589	0.022
187	Amyotrophic lateral sclerosis	Interleukin-10 levels	90274795	|| id:ebi-a-GCST90027164	Weighted median	14	0.0149116	0.0509227	0.769654	1.01502	0.918607	1.12156	21.1808	12	0.0477941	-0.0187232	0.130589	0.022
188	Amyotrophic lateral sclerosis	Interleukin-10 levels	90274795	|| id:ebi-a-GCST90027164	Inverse variance weighted	14	0.0356336	0.0513814	0.487988	1.03628	0.936998	1.14607	21.1808	12	0.0477941	-0.0187232	0.130589	0.022
189	Amyotrophic lateral sclerosis	Interleukin-10 levels	90274795	|| id:ebi-a-GCST90027164	Simple mode	14	0.104641	0.0767894	0.196118	1.11031	0.95517	1.29065	21.1808	12	0.0477941	-0.0187232	0.130589	0.022
190	Amyotrophic lateral sclerosis	Interleukin-10 levels	90274795	|| id:ebi-a-GCST90027164	Weighted mode	14	0.0585417	0.0661691	0.392373	1.06029	0.931322	1.20711	21.1808	12	0.0477941	-0.0187232	0.130589	0.022
191	Amyotrophic lateral sclerosis	Interleukin-10 receptor subunit alpha levels	90274796	|| id:ebi-a-GCST90027164	MR Egger	14	-0.0732229	0.0843964	0.402627	0.929394	0.787698	1.09658	8.2439	12	0.765792	0.0105803	0.295866	0.709
192	Amyotrophic lateral sclerosis	Interleukin-10 receptor subunit alpha levels	90274796	|| id:ebi-a-GCST90027164	Weighted median	14	0.0218224	0.0554113	0.693709	1.02206	0.916875	1.13932	8.2439	12	0.765792	0.0105803	0.295866	0.709
193	Amyotrophic lateral sclerosis	Interleukin-10 receptor subunit alpha levels	90274796	|| id:ebi-a-GCST90027164	Inverse variance weighted	14	0.00774248	0.0404363	0.848154	1.00777	0.930985	1.09089	8.2439	12	0.765792	0.0105803	0.295866	0.709
194	Amyotrophic lateral sclerosis	Interleukin-10 receptor subunit alpha levels	90274796	|| id:ebi-a-GCST90027164	Simple mode	14	0.0060467	0.0902631	0.947609	1.00607	0.842932	1.20077	8.2439	12	0.765792	0.0105803	0.295866	0.709
195	Amyotrophic lateral sclerosis	Interleukin-10 receptor subunit alpha levels	90274796	|| id:ebi-a-GCST90027164	Weighted mode	14	0.0473545	0.0730953	0.528361	1.04849	0.908544	1.21	8.2439	12	0.765792	0.0105803	0.295866	0.709
196	Amyotrophic lateral sclerosis	Interleukin-10 receptor subunit beta levels	90274797	|| id:ebi-a-GCST90027164	MR Egger	14	0.0452403	0.116197	0.703846	1.04628	0.833179	1.31388	29.2809	12	0.00357859	-0.00568375	0.675952	0.001
197	Amyotrophic lateral sclerosis	Interleukin-10 receptor subunit beta levels	90274797	|| id:ebi-a-GCST90027164	Weighted median	14	-0.00172058	0.053029	0.974116	0.998281	0.899733	1.10762	29.2809	12	0.00357859	-0.00568375	0.675952	0.001
198	Amyotrophic lateral sclerosis	Interleukin-10 receptor subunit beta levels	90274797	|| id:ebi-a-GCST90027164	Inverse variance weighted	14	0.00146881	0.0535694	0.978126	1.00147	0.901652	1.11234	29.2809	12	0.00357859	-0.00568375	0.675952	0.001
199	Amyotrophic lateral sclerosis	Interleukin-10 receptor subunit beta levels	90274797	|| id:ebi-a-GCST90027164	Simple mode	14	-0.0707221	0.0962482	0.475515	0.931721	0.771539	1.12516	29.2809	12	0.00357859	-0.00568375	0.675952	0.001
200	Amyotrophic lateral sclerosis	Interleukin-10 receptor subunit beta levels	90274797	|| id:ebi-a-GCST90027164	Weighted mode	14	-0.0949924	0.0820284	0.267679	0.90938	0.774322	1.068	29.2809	12	0.00357859	-0.00568375	0.675952	0.001
201	Amyotrophic lateral sclerosis	Interleukin-12 subunit beta levels	90274798	|| id:ebi-a-GCST90027164	MR Egger	14	0.178723	0.0902853	0.0711608	1.19569	1.00177	1.42715	17.0566	12	0.147482	-0.0125081	0.248748	0.127
202	Amyotrophic lateral sclerosis	Interleukin-12 subunit beta levels	90274798	|| id:ebi-a-GCST90027164	Weighted median	14	0.001245	0.055103	0.981974	1.00125	0.898744	1.11544	17.0566	12	0.147482	-0.0125081	0.248748	0.127
203	Amyotrophic lateral sclerosis	Interleukin-12 subunit beta levels	90274798	|| id:ebi-a-GCST90027164	Inverse variance weighted	14	0.0826619	0.0440411	0.0605285	1.08617	0.996348	1.1841	17.0566	12	0.147482	-0.0125081	0.248748	0.127
204	Amyotrophic lateral sclerosis	Interleukin-12 subunit beta levels	90274798	|| id:ebi-a-GCST90027164	Simple mode	14	-0.0252241	0.0837811	0.768121	0.975091	0.827426	1.14911	17.0566	12	0.147482	-0.0125081	0.248748	0.127
205	Amyotrophic lateral sclerosis	Interleukin-12 subunit beta levels	90274798	|| id:ebi-a-GCST90027164	Weighted mode	14	-0.0199113	0.0642124	0.761412	0.980286	0.864359	1.11176	17.0566	12	0.147482	-0.0125081	0.248748	0.127
206	Amyotrophic lateral sclerosis	Interleukin-13 levels	90274799	|| id:ebi-a-GCST90027164	MR Egger	14	0.0100643	0.0844189	0.907075	1.01012	0.856076	1.19187	11.1039	12	0.520035	0.00641045	0.520377	0.571
207	Amyotrophic lateral sclerosis	Interleukin-13 levels	90274799	|| id:ebi-a-GCST90027164	Weighted median	14	0.0236762	0.0556215	0.670351	1.02396	0.918198	1.1419	11.1039	12	0.520035	0.00641045	0.520377	0.571
208	Amyotrophic lateral sclerosis	Interleukin-13 levels	90274799	|| id:ebi-a-GCST90027164	Inverse variance weighted	14	0.0591273	0.0404546	0.143858	1.06091	0.980038	1.14846	11.1039	12	0.520035	0.00641045	0.520377	0.571
209	Amyotrophic lateral sclerosis	Interleukin-13 levels	90274799	|| id:ebi-a-GCST90027164	Simple mode	14	-0.0121519	0.0983512	0.903557	0.987922	0.814712	1.19796	11.1039	12	0.520035	0.00641045	0.520377	0.571
210	Amyotrophic lateral sclerosis	Interleukin-13 levels	90274799	|| id:ebi-a-GCST90027164	Weighted mode	14	0.00112022	0.0789701	0.988897	1.00112	0.857562	1.16871	11.1039	12	0.520035	0.00641045	0.520377	0.571
211	Amyotrophic lateral sclerosis	Interleukin-15 receptor subunit alpha levels	90274800	|| id:ebi-a-GCST90027164	MR Egger	14	-0.132587	0.106961	0.238826	0.875827	0.710184	1.0801	20.2682	12	0.0621804	0.0169001	0.193582	0.027
212	Amyotrophic lateral sclerosis	Interleukin-15 receptor subunit alpha levels	90274800	|| id:ebi-a-GCST90027164	Weighted median	14	0.0360561	0.0614256	0.557211	1.03671	0.919121	1.16935	20.2682	12	0.0621804	0.0169001	0.193582	0.027
213	Amyotrophic lateral sclerosis	Interleukin-15 receptor subunit alpha levels	90274800	|| id:ebi-a-GCST90027164	Inverse variance weighted	14	-0.00314692	0.0527972	0.952471	0.996858	0.898859	1.10554	20.2682	12	0.0621804	0.0169001	0.193582	0.027
214	Amyotrophic lateral sclerosis	Interleukin-15 receptor subunit alpha levels	90274800	|| id:ebi-a-GCST90027164	Simple mode	14	0.114873	0.122911	0.367029	1.12173	0.881586	1.42729	20.2682	12	0.0621804	0.0169001	0.193582	0.027
215	Amyotrophic lateral sclerosis	Interleukin-15 receptor subunit alpha levels	90274800	|| id:ebi-a-GCST90027164	Weighted mode	14	0.0742354	0.144209	0.61535	1.07706	0.81187	1.42887	20.2682	12	0.0621804	0.0169001	0.193582	0.027
216	Amyotrophic lateral sclerosis	Interleukin-17A levels	90274801	|| id:ebi-a-GCST90027164	MR Egger	14	-0.162363	0.0842879	0.0780825	0.850132	0.720675	1.00284	9.92179	12	0.622822	0.019294	0.069272	0.385
217	Amyotrophic lateral sclerosis	Interleukin-17A levels	90274801	|| id:ebi-a-GCST90027164	Weighted median	14	-0.0197831	0.0584385	0.734965	0.980411	0.874308	1.09939	9.92179	12	0.622822	0.019294	0.069272	0.385
218	Amyotrophic lateral sclerosis	Interleukin-17A levels	90274801	|| id:ebi-a-GCST90027164	Inverse variance weighted	14	-0.0148016	0.0417874	0.72318	0.985307	0.907824	1.0694	9.92179	12	0.622822	0.019294	0.069272	0.385
219	Amyotrophic lateral sclerosis	Interleukin-17A levels	90274801	|| id:ebi-a-GCST90027164	Simple mode	14	0.0131323	0.104231	0.901666	1.01322	0.826	1.24287	9.92179	12	0.622822	0.019294	0.069272	0.385
220	Amyotrophic lateral sclerosis	Interleukin-17A levels	90274801	|| id:ebi-a-GCST90027164	Weighted mode	14	0.00440366	0.072149	0.952259	1.00441	0.871963	1.15698	9.92179	12	0.622822	0.019294	0.069272	0.385
221	Amyotrophic lateral sclerosis	Interleukin-17C levels	90274802	|| id:ebi-a-GCST90027164	MR Egger	14	-0.0837128	0.0862464	0.350894	0.919695	0.776657	1.08908	12.6256	12	0.396831	0.0164615	0.121819	0.32
222	Amyotrophic lateral sclerosis	Interleukin-17C levels	90274802	|| id:ebi-a-GCST90027164	Weighted median	14	0.00767369	0.0565268	0.892016	1.0077	0.90202	1.12577	12.6256	12	0.396831	0.0164615	0.121819	0.32
223	Amyotrophic lateral sclerosis	Interleukin-17C levels	90274802	|| id:ebi-a-GCST90027164	Inverse variance weighted	14	0.0422613	0.044116	0.338084	1.04317	0.956757	1.13738	12.6256	12	0.396831	0.0164615	0.121819	0.32
224	Amyotrophic lateral sclerosis	Interleukin-17C levels	90274802	|| id:ebi-a-GCST90027164	Simple mode	14	-0.00607116	0.085993	0.94479	0.993947	0.839778	1.17642	12.6256	12	0.396831	0.0164615	0.121819	0.32
225	Amyotrophic lateral sclerosis	Interleukin-17C levels	90274802	|| id:ebi-a-GCST90027164	Weighted mode	14	-0.00348975	0.0761196	0.96413	0.996516	0.858401	1.15685	12.6256	12	0.396831	0.0164615	0.121819	0.32
226	Amyotrophic lateral sclerosis	Interleukin-18 levels	90274803	|| id:ebi-a-GCST90027164	MR Egger	14	0.00728184	0.0821298	0.930813	1.00731	0.857536	1.18324	14.1298	12	0.292497	-0.00397534	0.679436	0.298
227	Amyotrophic lateral sclerosis	Interleukin-18 levels	90274803	|| id:ebi-a-GCST90027164	Weighted median	14	-0.0298717	0.0543777	0.582774	0.97057	0.872448	1.07973	14.1298	12	0.292497	-0.00397534	0.679436	0.298
228	Amyotrophic lateral sclerosis	Interleukin-18 levels	90274803	|| id:ebi-a-GCST90027164	Inverse variance weighted	14	-0.0232432	0.0381017	0.541841	0.977025	0.906719	1.05278	14.1298	12	0.292497	-0.00397534	0.679436	0.298
229	Amyotrophic lateral sclerosis	Interleukin-18 levels	90274803	|| id:ebi-a-GCST90027164	Simple mode	14	-0.0326725	0.102012	0.753844	0.967855	0.792458	1.18207	14.1298	12	0.292497	-0.00397534	0.679436	0.298
230	Amyotrophic lateral sclerosis	Interleukin-18 levels	90274803	|| id:ebi-a-GCST90027164	Weighted mode	14	-0.0882362	0.105865	0.419625	0.915545	0.743988	1.12666	14.1298	12	0.292497	-0.00397534	0.679436	0.298
231	Amyotrophic lateral sclerosis	interleukin-18 receptor 1 levels	90274804	|| id:ebi-a-GCST90027164	MR Egger	14	0.0870341	0.0886741	0.345719	1.09093	0.916891	1.29801	16.4737	12	0.17049	-0.00640391	0.539044	0.242
232	Amyotrophic lateral sclerosis	interleukin-18 receptor 1 levels	90274804	|| id:ebi-a-GCST90027164	Weighted median	14	0.0186283	0.0516724	0.718468	1.0188	0.920674	1.12739	16.4737	12	0.17049	-0.00640391	0.539044	0.242
233	Amyotrophic lateral sclerosis	interleukin-18 receptor 1 levels	90274804	|| id:ebi-a-GCST90027164	Inverse variance weighted	14	0.0378096	0.0414669	0.361873	1.03853	0.957466	1.12647	16.4737	12	0.17049	-0.00640391	0.539044	0.242
234	Amyotrophic lateral sclerosis	interleukin-18 receptor 1 levels	90274804	|| id:ebi-a-GCST90027164	Simple mode	14	0.043081	0.0939181	0.654019	1.04402	0.868491	1.25503	16.4737	12	0.17049	-0.00640391	0.539044	0.242
235	Amyotrophic lateral sclerosis	interleukin-18 receptor 1 levels	90274804	|| id:ebi-a-GCST90027164	Weighted mode	14	0.00594874	0.0692059	0.93281	1.00597	0.878363	1.15211	16.4737	12	0.17049	-0.00640391	0.539044	0.242
236	Amyotrophic lateral sclerosis	Interleukin-1-alpha levels	90274805	|| id:ebi-a-GCST90027164	MR Egger	14	0.0906909	0.105585	0.407205	1.09493	0.890248	1.34667	18.7926	12	0.0936579	-0.0066107	0.594921	0.114
237	Amyotrophic lateral sclerosis	Interleukin-1-alpha levels	90274805	|| id:ebi-a-GCST90027164	Weighted median	14	0.0828104	0.0597436	0.165717	1.08634	0.966294	1.22129	18.7926	12	0.0936579	-0.0066107	0.594921	0.114
238	Amyotrophic lateral sclerosis	Interleukin-1-alpha levels	90274805	|| id:ebi-a-GCST90027164	Inverse variance weighted	14	0.040065	0.0491924	0.415385	1.04088	0.945206	1.14623	18.7926	12	0.0936579	-0.0066107	0.594921	0.114
239	Amyotrophic lateral sclerosis	Interleukin-1-alpha levels	90274805	|| id:ebi-a-GCST90027164	Simple mode	14	0.0151943	0.0938304	0.873848	1.01531	0.844751	1.22031	18.7926	12	0.0936579	-0.0066107	0.594921	0.114
240	Amyotrophic lateral sclerosis	Interleukin-1-alpha levels	90274805	|| id:ebi-a-GCST90027164	Weighted mode	14	0.116845	0.0757062	0.146718	1.12395	0.968953	1.30373	18.7926	12	0.0936579	-0.0066107	0.594921	0.114
241	Amyotrophic lateral sclerosis	Interleukin-2 levels	90274806	|| id:ebi-a-GCST90027164	MR Egger	14	-0.080901	0.0840163	0.354591	0.922285	0.782256	1.08738	8.0514	12	0.781101	0.0193412	0.0678059	0.57
242	Amyotrophic lateral sclerosis	Interleukin-2 levels	90274806	|| id:ebi-a-GCST90027164	Weighted median	14	0.0695349	0.0593547	0.241393	1.07201	0.954278	1.20427	8.0514	12	0.781101	0.0193412	0.0678059	0.57
243	Amyotrophic lateral sclerosis	Interleukin-2 levels	90274806	|| id:ebi-a-GCST90027164	Inverse variance weighted	14	0.067161	0.0402094	0.0948641	1.06947	0.988418	1.15716	8.0514	12	0.781101	0.0193412	0.0678059	0.57
244	Amyotrophic lateral sclerosis	Interleukin-2 levels	90274806	|| id:ebi-a-GCST90027164	Simple mode	14	0.140047	0.0902569	0.144742	1.15033	0.963815	1.37294	8.0514	12	0.781101	0.0193412	0.0678059	0.57
245	Amyotrophic lateral sclerosis	Interleukin-2 levels	90274806	|| id:ebi-a-GCST90027164	Weighted mode	14	0.106777	0.0752565	0.179474	1.11269	0.960092	1.28953	8.0514	12	0.781101	0.0193412	0.0678059	0.57
246	Amyotrophic lateral sclerosis	Interleukin-20 levels	90274807	|| id:ebi-a-GCST90027164	MR Egger	14	0.0460152	0.0995204	0.652088	1.04709	0.861531	1.27262	17.0253	12	0.148649	-0.00626528	0.592848	0.194
247	Amyotrophic lateral sclerosis	Interleukin-20 levels	90274807	|| id:ebi-a-GCST90027164	Weighted median	14	0.0570607	0.0576232	0.322058	1.05872	0.945652	1.18531	17.0253	12	0.148649	-0.00626528	0.592848	0.194
248	Amyotrophic lateral sclerosis	Interleukin-20 levels	90274807	|| id:ebi-a-GCST90027164	Inverse variance weighted	14	-0.00200577	0.0462736	0.965426	0.997996	0.911465	1.09274	17.0253	12	0.148649	-0.00626528	0.592848	0.194
249	Amyotrophic lateral sclerosis	Interleukin-20 levels	90274807	|| id:ebi-a-GCST90027164	Simple mode	14	0.113591	0.112998	0.333122	1.12029	0.897731	1.39803	17.0253	12	0.148649	-0.00626528	0.592848	0.194
250	Amyotrophic lateral sclerosis	Interleukin-20 levels	90274807	|| id:ebi-a-GCST90027164	Weighted mode	14	0.0840955	0.0868194	0.350409	1.08773	0.917529	1.28951	17.0253	12	0.148649	-0.00626528	0.592848	0.194
251	Amyotrophic lateral sclerosis	Interleukin-20 receptor subunit alpha levels	90274808	|| id:ebi-a-GCST90027164	MR Egger	14	0.0376528	0.0848859	0.665246	1.03837	0.879217	1.22633	5.0507	12	0.956264	-0.00211655	0.831541	0.98
252	Amyotrophic lateral sclerosis	Interleukin-20 receptor subunit alpha levels	90274808	|| id:ebi-a-GCST90027164	Weighted median	14	-0.00579319	0.052696	0.91246	0.994224	0.896661	1.1024	5.0507	12	0.956264	-0.00211655	0.831541	0.98
253	Amyotrophic lateral sclerosis	Interleukin-20 receptor subunit alpha levels	90274808	|| id:ebi-a-GCST90027164	Inverse variance weighted	14	0.0214586	0.0407108	0.598125	1.02169	0.943334	1.10656	5.0507	12	0.956264	-0.00211655	0.831541	0.98
254	Amyotrophic lateral sclerosis	Interleukin-20 receptor subunit alpha levels	90274808	|| id:ebi-a-GCST90027164	Simple mode	14	-0.0328633	0.0844213	0.703373	0.967671	0.8201	1.1418	5.0507	12	0.956264	-0.00211655	0.831541	0.98
255	Amyotrophic lateral sclerosis	Interleukin-20 receptor subunit alpha levels	90274808	|| id:ebi-a-GCST90027164	Weighted mode	14	-0.0178547	0.0679221	0.79677	0.982304	0.859863	1.12218	5.0507	12	0.956264	-0.00211655	0.831541	0.98
256	Amyotrophic lateral sclerosis	Interleukin-22 receptor subunit alpha-1 levels	90274809	|| id:ebi-a-GCST90027164	MR Egger	14	-0.122947	0.085591	0.176431	0.884311	0.747736	1.04583	6.89165	12	0.86469	0.0192558	0.073314	0.686
257	Amyotrophic lateral sclerosis	Interleukin-22 receptor subunit alpha-1 levels	90274809	|| id:ebi-a-GCST90027164	Weighted median	14	0.00115165	0.0579527	0.984145	1.00115	0.893655	1.12158	6.89165	12	0.86469	0.0192558	0.073314	0.686
258	Amyotrophic lateral sclerosis	Interleukin-22 receptor subunit alpha-1 levels	90274809	|| id:ebi-a-GCST90027164	Inverse variance weighted	14	0.0243611	0.0411283	0.553636	1.02466	0.945303	1.11068	6.89165	12	0.86469	0.0192558	0.073314	0.686
259	Amyotrophic lateral sclerosis	Interleukin-22 receptor subunit alpha-1 levels	90274809	|| id:ebi-a-GCST90027164	Simple mode	14	-0.0517673	0.087304	0.563385	0.94955	0.800208	1.12676	6.89165	12	0.86469	0.0192558	0.073314	0.686
260	Amyotrophic lateral sclerosis	Interleukin-22 receptor subunit alpha-1 levels	90274809	|| id:ebi-a-GCST90027164	Weighted mode	14	-0.00540866	0.0724444	0.941622	0.994606	0.862949	1.14635	6.89165	12	0.86469	0.0192558	0.073314	0.686
261	Amyotrophic lateral sclerosis	Interleukin-24 levels	90274810	|| id:ebi-a-GCST90027164	MR Egger	14	0.00565919	0.0966256	0.95426	1.00568	0.832163	1.21537	15.4139	12	0.219576	0.00215629	0.848969	0.262
262	Amyotrophic lateral sclerosis	Interleukin-24 levels	90274810	|| id:ebi-a-GCST90027164	Weighted median	14	0.0301526	0.0603124	0.617117	1.03061	0.915706	1.15994	15.4139	12	0.219576	0.00215629	0.848969	0.262
263	Amyotrophic lateral sclerosis	Interleukin-24 levels	90274810	|| id:ebi-a-GCST90027164	Inverse variance weighted	14	0.0221484	0.0446816	0.62011	1.0224	0.936667	1.11597	15.4139	12	0.219576	0.00215629	0.848969	0.262
264	Amyotrophic lateral sclerosis	Interleukin-24 levels	90274810	|| id:ebi-a-GCST90027164	Simple mode	14	0.0163045	0.11186	0.886348	1.01644	0.816326	1.26561	15.4139	12	0.219576	0.00215629	0.848969	0.262
265	Amyotrophic lateral sclerosis	Interleukin-24 levels	90274810	|| id:ebi-a-GCST90027164	Weighted mode	14	0.0356953	0.0832081	0.674955	1.03634	0.880388	1.21992	15.4139	12	0.219576	0.00215629	0.848969	0.262
266	Amyotrophic lateral sclerosis	Interleukin-2 receptor subunit beta levels	90274811	|| id:ebi-a-GCST90027164	MR Egger	14	-0.008129	0.103385	0.938624	0.991904	0.809966	1.21471	18.1875	12	0.110114	0.00942139	0.442005	0.125
267	Amyotrophic lateral sclerosis	Interleukin-2 receptor subunit beta levels	90274811	|| id:ebi-a-GCST90027164	Weighted median	14	0.0391439	0.0600055	0.514184	1.03992	0.924533	1.16971	18.1875	12	0.110114	0.00942139	0.442005	0.125
268	Amyotrophic lateral sclerosis	Interleukin-2 receptor subunit beta levels	90274811	|| id:ebi-a-GCST90027164	Inverse variance weighted	14	0.0640414	0.0487842	0.189267	1.06614	0.968918	1.17311	18.1875	12	0.110114	0.00942139	0.442005	0.125
269	Amyotrophic lateral sclerosis	Interleukin-2 receptor subunit beta levels	90274811	|| id:ebi-a-GCST90027164	Simple mode	14	0.0570058	0.120523	0.644066	1.05866	0.835922	1.34075	18.1875	12	0.110114	0.00942139	0.442005	0.125
270	Amyotrophic lateral sclerosis	Interleukin-2 receptor subunit beta levels	90274811	|| id:ebi-a-GCST90027164	Weighted mode	14	0.00238135	0.0861828	0.978376	1.00238	0.846591	1.18685	18.1875	12	0.110114	0.00942139	0.442005	0.125
271	Amyotrophic lateral sclerosis	Interleukin-33 levels	90274812	|| id:ebi-a-GCST90027164	MR Egger	14	0.0812891	0.0858744	0.362513	1.08468	0.916654	1.28352	12.5735	12	0.400788	-0.000890919	0.929318	0.497
272	Amyotrophic lateral sclerosis	Interleukin-33 levels	90274812	|| id:ebi-a-GCST90027164	Weighted median	14	0.0798622	0.0564463	0.157117	1.08314	0.969696	1.20985	12.5735	12	0.400788	-0.000890919	0.929318	0.497
273	Amyotrophic lateral sclerosis	Interleukin-33 levels	90274812	|| id:ebi-a-GCST90027164	Inverse variance weighted	14	0.074459	0.0401504	0.0636675	1.0773	0.995773	1.1655	12.5735	12	0.400788	-0.000890919	0.929318	0.497
274	Amyotrophic lateral sclerosis	Interleukin-33 levels	90274812	|| id:ebi-a-GCST90027164	Simple mode	14	0.0570683	0.0956774	0.561108	1.05873	0.877692	1.27711	12.5735	12	0.400788	-0.000890919	0.929318	0.497
275	Amyotrophic lateral sclerosis	Interleukin-33 levels	90274812	|| id:ebi-a-GCST90027164	Weighted mode	14	0.093297	0.0731845	0.224688	1.09779	0.951092	1.26711	12.5735	12	0.400788	-0.000890919	0.929318	0.497
276	Amyotrophic lateral sclerosis	Interleukin-4 levels	90274813	|| id:ebi-a-GCST90027164	MR Egger	14	-0.050825	0.0852081	0.561938	0.950445	0.80426	1.1232	7.13905	12	0.848289	0.00607058	0.546176	0.856
277	Amyotrophic lateral sclerosis	Interleukin-4 levels	90274813	|| id:ebi-a-GCST90027164	Weighted median	14	-0.000401013	0.0534444	0.994013	0.999599	0.900188	1.10999	7.13905	12	0.848289	0.00607058	0.546176	0.856
278	Amyotrophic lateral sclerosis	Interleukin-4 levels	90274813	|| id:ebi-a-GCST90027164	Inverse variance weighted	14	-0.00441689	0.0409479	0.914102	0.995593	0.918811	1.07879	7.13905	12	0.848289	0.00607058	0.546176	0.856
279	Amyotrophic lateral sclerosis	Interleukin-4 levels	90274813	|| id:ebi-a-GCST90027164	Simple mode	14	-0.00350333	0.0809515	0.966138	0.996503	0.850298	1.16785	7.13905	12	0.848289	0.00607058	0.546176	0.856
280	Amyotrophic lateral sclerosis	Interleukin-4 levels	90274813	|| id:ebi-a-GCST90027164	Weighted mode	14	0.00595463	0.0693813	0.932914	1.00597	0.878067	1.15251	7.13905	12	0.848289	0.00607058	0.546176	0.856
281	Amyotrophic lateral sclerosis	Interleukin-5 levels	90274814	|| id:ebi-a-GCST90027164	MR Egger	14	-0.0788079	0.0852081	0.37325	0.924217	0.782066	1.09221	10.2717	12	0.592142	-0.00127387	0.898468	0.686
282	Amyotrophic lateral sclerosis	Interleukin-5 levels	90274814	|| id:ebi-a-GCST90027164	Weighted median	14	-0.0467503	0.0546493	0.392296	0.954326	0.85739	1.06222	10.2717	12	0.592142	-0.00127387	0.898468	0.686
283	Amyotrophic lateral sclerosis	Interleukin-5 levels	90274814	|| id:ebi-a-GCST90027164	Inverse variance weighted	14	-0.0885463	0.0409479	0.0305861	0.915261	0.844674	0.991746	10.2717	12	0.592142	-0.00127387	0.898468	0.686
284	Amyotrophic lateral sclerosis	Interleukin-5 levels	90274814	|| id:ebi-a-GCST90027164	Simple mode	14	-0.0382184	0.0932824	0.688692	0.962503	0.801675	1.15559	10.2717	12	0.592142	-0.00127387	0.898468	0.686
285	Amyotrophic lateral sclerosis	Interleukin-5 levels	90274814	|| id:ebi-a-GCST90027164	Weighted mode	14	-0.0291354	0.0779966	0.714762	0.971285	0.833594	1.13172	10.2717	12	0.592142	-0.00127387	0.898468	0.686
286	Amyotrophic lateral sclerosis	Interleukin-6 levels	90274815	|| id:ebi-a-GCST90027164	MR Egger	14	0.116644	0.0977962	0.256027	1.12372	0.92771	1.36114	19.9954	12	0.0671722	-0.0183951	0.125603	0.03
287	Amyotrophic lateral sclerosis	Interleukin-6 levels	90274815	|| id:ebi-a-GCST90027164	Weighted median	14	-0.00577415	0.0523287	0.912137	0.994242	0.897324	1.10163	19.9954	12	0.0671722	-0.0183951	0.125603	0.03
288	Amyotrophic lateral sclerosis	Interleukin-6 levels	90274815	|| id:ebi-a-GCST90027164	Inverse variance weighted	14	-0.0245987	0.049943	0.622341	0.975701	0.884717	1.07604	19.9954	12	0.0671722	-0.0183951	0.125603	0.03
289	Amyotrophic lateral sclerosis	Interleukin-6 levels	90274815	|| id:ebi-a-GCST90027164	Simple mode	14	-0.0571032	0.0899689	0.536635	0.944497	0.791803	1.12664	19.9954	12	0.0671722	-0.0183951	0.125603	0.03
290	Amyotrophic lateral sclerosis	Interleukin-6 levels	90274815	|| id:ebi-a-GCST90027164	Weighted mode	14	-0.000589017	0.0662379	0.99304	0.999411	0.877731	1.13796	19.9954	12	0.0671722	-0.0183951	0.125603	0.03
291	Amyotrophic lateral sclerosis	Interleukin-7 levels	90274816	|| id:ebi-a-GCST90027164	MR Egger	14	-0.0773067	0.0925277	0.419762	0.925606	0.772085	1.10965	17.6399	12	0.12707	0.0127996	0.248345	0.148
292	Amyotrophic lateral sclerosis	Interleukin-7 levels	90274816	|| id:ebi-a-GCST90027164	Weighted median	14	0.00224166	0.0505921	0.964659	1.00224	0.90763	1.10672	17.6399	12	0.12707	0.0127996	0.248345	0.148
293	Amyotrophic lateral sclerosis	Interleukin-7 levels	90274816	|| id:ebi-a-GCST90027164	Inverse variance weighted	14	0.0213035	0.0450252	0.636109	1.02153	0.935246	1.11578	17.6399	12	0.12707	0.0127996	0.248345	0.148
294	Amyotrophic lateral sclerosis	Interleukin-7 levels	90274816	|| id:ebi-a-GCST90027164	Simple mode	14	0.0109069	0.0778592	0.89074	1.01097	0.867884	1.17764	17.6399	12	0.12707	0.0127996	0.248345	0.148
295	Amyotrophic lateral sclerosis	Interleukin-7 levels	90274816	|| id:ebi-a-GCST90027164	Weighted mode	14	0.00385498	0.0615463	0.95101	1.00386	0.889785	1.13257	17.6399	12	0.12707	0.0127996	0.248345	0.148
296	Amyotrophic lateral sclerosis	Interleukin-8 levels	90274817	|| id:ebi-a-GCST90027164	MR Egger	14	-0.0638088	0.0796043	0.438384	0.938184	0.802653	1.0966	13.2476	12	0.351304	0.0113457	0.235671	0.349
297	Amyotrophic lateral sclerosis	Interleukin-8 levels	90274817	|| id:ebi-a-GCST90027164	Weighted median	14	-0.0162907	0.0504094	0.746569	0.983841	0.891283	1.08601	13.2476	12	0.351304	0.0113457	0.235671	0.349
298	Amyotrophic lateral sclerosis	Interleukin-8 levels	90274817	|| id:ebi-a-GCST90027164	Inverse variance weighted	14	0.023383	0.0390131	0.548931	1.02366	0.948302	1.105	13.2476	12	0.351304	0.0113457	0.235671	0.349
299	Amyotrophic lateral sclerosis	Interleukin-8 levels	90274817	|| id:ebi-a-GCST90027164	Simple mode	14	-0.0557516	0.0726966	0.456839	0.945774	0.820175	1.09061	13.2476	12	0.351304	0.0113457	0.235671	0.349
300	Amyotrophic lateral sclerosis	Interleukin-8 levels	90274817	|| id:ebi-a-GCST90027164	Weighted mode	14	-0.0321123	0.0594746	0.598371	0.968398	0.861843	1.08813	13.2476	12	0.351304	0.0113457	0.235671	0.349
301	Amyotrophic lateral sclerosis	Latency-associated peptide transforming growth factor beta 1 levels	90274818	|| id:ebi-a-GCST90027164	MR Egger	14	-0.0581304	0.0753547	0.455379	0.943527	0.813975	1.0937	3.78298	12	0.987042	0.0133881	0.145669	0.954
302	Amyotrophic lateral sclerosis	Latency-associated peptide transforming growth factor beta 1 levels	90274818	|| id:ebi-a-GCST90027164	Weighted median	14	0.0325785	0.0464365	0.482947	1.03312	0.943238	1.13156	3.78298	12	0.987042	0.0133881	0.145669	0.954
303	Amyotrophic lateral sclerosis	Latency-associated peptide transforming growth factor beta 1 levels	90274818	|| id:ebi-a-GCST90027164	Inverse variance weighted	14	0.0448519	0.0360303	0.213191	1.04587	0.974562	1.1224	3.78298	12	0.987042	0.0133881	0.145669	0.954
304	Amyotrophic lateral sclerosis	Latency-associated peptide transforming growth factor beta 1 levels	90274818	|| id:ebi-a-GCST90027164	Simple mode	14	0.0102569	0.0774556	0.896677	1.01031	0.868007	1.17594	3.78298	12	0.987042	0.0133881	0.145669	0.954
305	Amyotrophic lateral sclerosis	Latency-associated peptide transforming growth factor beta 1 levels	90274818	|| id:ebi-a-GCST90027164	Weighted mode	14	-0.000275844	0.0637719	0.996614	0.999724	0.88226	1.13283	3.78298	12	0.987042	0.0133881	0.145669	0.954
306	Amyotrophic lateral sclerosis	Leukemia inhibitory factor levels	90274819	|| id:ebi-a-GCST90027164	MR Egger	14	0.048419	0.0843831	0.5767	1.04961	0.88961	1.23839	5.78847	12	0.926367	-0.00356504	0.718618	0.946
307	Amyotrophic lateral sclerosis	Leukemia inhibitory factor levels	90274819	|| id:ebi-a-GCST90027164	Weighted median	14	0.0257514	0.0532061	0.628391	1.02609	0.924472	1.13887	5.78847	12	0.926367	-0.00356504	0.718618	0.946
308	Amyotrophic lateral sclerosis	Leukemia inhibitory factor levels	90274819	|| id:ebi-a-GCST90027164	Inverse variance weighted	14	0.0210936	0.0404252	0.601815	1.02132	0.943518	1.10553	5.78847	12	0.926367	-0.00356504	0.718618	0.946
309	Amyotrophic lateral sclerosis	Leukemia inhibitory factor levels	90274819	|| id:ebi-a-GCST90027164	Simple mode	14	0.0253811	0.0870431	0.775199	1.02571	0.864829	1.21651	5.78847	12	0.926367	-0.00356504	0.718618	0.946
310	Amyotrophic lateral sclerosis	Leukemia inhibitory factor levels	90274819	|| id:ebi-a-GCST90027164	Weighted mode	14	0.0398217	0.0741534	0.600326	1.04063	0.899857	1.20341	5.78847	12	0.926367	-0.00356504	0.718618	0.946
311	Amyotrophic lateral sclerosis	Leukemia inhibitory factor receptor levels	90274820	|| id:ebi-a-GCST90027164	MR Egger	14	-0.108828	0.0873011	0.236338	0.896885	0.755831	1.06426	13.7886	12	0.314412	0.0121003	0.249102	0.289
312	Amyotrophic lateral sclerosis	Leukemia inhibitory factor receptor levels	90274820	|| id:ebi-a-GCST90027164	Weighted median	14	-0.0340122	0.0567109	0.548675	0.96656	0.864879	1.08019	13.7886	12	0.314412	0.0121003	0.249102	0.289
313	Amyotrophic lateral sclerosis	Leukemia inhibitory factor receptor levels	90274820	|| id:ebi-a-GCST90027164	Inverse variance weighted	14	-0.0157845	0.0422256	0.708543	0.984339	0.906153	1.06927	13.7886	12	0.314412	0.0121003	0.249102	0.289
314	Amyotrophic lateral sclerosis	Leukemia inhibitory factor receptor levels	90274820	|| id:ebi-a-GCST90027164	Simple mode	14	-0.0122163	0.0981032	0.902805	0.987858	0.815056	1.1973	13.7886	12	0.314412	0.0121003	0.249102	0.289
315	Amyotrophic lateral sclerosis	Leukemia inhibitory factor receptor levels	90274820	|| id:ebi-a-GCST90027164	Weighted mode	14	-0.0435624	0.0628569	0.500479	0.957373	0.846401	1.08289	13.7886	12	0.314412	0.0121003	0.249102	0.289
316	Amyotrophic lateral sclerosis	Monocyte chemoattractant protein-1 levels	90274821	|| id:ebi-a-GCST90027164	MR Egger	14	-0.0024622	0.0927774	0.979264	0.997541	0.831681	1.19648	18.0583	12	0.113931	0.00480996	0.657849	0.166
317	Amyotrophic lateral sclerosis	Monocyte chemoattractant protein-1 levels	90274821	|| id:ebi-a-GCST90027164	Weighted median	14	0.000869745	0.0500247	0.986128	1.00087	0.907394	1.10398	18.0583	12	0.113931	0.00480996	0.657849	0.166
318	Amyotrophic lateral sclerosis	Monocyte chemoattractant protein-1 levels	90274821	|| id:ebi-a-GCST90027164	Inverse variance weighted	14	0.0345236	0.0430545	0.422635	1.03513	0.95136	1.12627	18.0583	12	0.113931	0.00480996	0.657849	0.166
319	Amyotrophic lateral sclerosis	Monocyte chemoattractant protein-1 levels	90274821	|| id:ebi-a-GCST90027164	Simple mode	14	0.0151222	0.0862847	0.863576	1.01524	0.857276	1.2023	18.0583	12	0.113931	0.00480996	0.657849	0.166
320	Amyotrophic lateral sclerosis	Monocyte chemoattractant protein-1 levels	90274821	|| id:ebi-a-GCST90027164	Weighted mode	14	-0.0132539	0.0666038	0.845345	0.986834	0.866063	1.12445	18.0583	12	0.113931	0.00480996	0.657849	0.166
321	Amyotrophic lateral sclerosis	Monocyte chemoattractant protein 2 levels	90274822	|| id:ebi-a-GCST90027164	MR Egger	14	-0.035799	0.0780532	0.654682	0.964834	0.827966	1.12433	12.5228	12	0.404654	0.00479027	0.600787	0.497
322	Amyotrophic lateral sclerosis	Monocyte chemoattractant protein 2 levels	90274822	|| id:ebi-a-GCST90027164	Weighted median	14	0.00218246	0.0484165	0.964046	1.00218	0.911454	1.10195	12.5228	12	0.404654	0.00479027	0.600787	0.497
323	Amyotrophic lateral sclerosis	Monocyte chemoattractant protein 2 levels	90274822	|| id:ebi-a-GCST90027164	Inverse variance weighted	14	0.00103299	0.0365702	0.977465	1.00103	0.931793	1.07542	12.5228	12	0.404654	0.00479027	0.600787	0.497
324	Amyotrophic lateral sclerosis	Monocyte chemoattractant protein 2 levels	90274822	|| id:ebi-a-GCST90027164	Simple mode	14	0.0107799	0.0718602	0.883058	1.01084	0.878037	1.16372	12.5228	12	0.404654	0.00479027	0.600787	0.497
325	Amyotrophic lateral sclerosis	Monocyte chemoattractant protein 2 levels	90274822	|| id:ebi-a-GCST90027164	Weighted mode	14	-0.00270591	0.0630083	0.966398	0.997298	0.881437	1.12839	12.5228	12	0.404654	0.00479027	0.600787	0.497
326	Amyotrophic lateral sclerosis	Monocyte chemoattractant protein-3 levels	90274823	|| id:ebi-a-GCST90027164	MR Egger	14	-0.131225	0.0965256	0.198993	0.877021	0.725848	1.05968	15.6337	12	0.208597	0.0132781	0.254217	0.198
327	Amyotrophic lateral sclerosis	Monocyte chemoattractant protein-3 levels	90274823	|| id:ebi-a-GCST90027164	Weighted median	14	-0.0495171	0.0584619	0.396997	0.951689	0.848655	1.06723	15.6337	12	0.208597	0.0132781	0.254217	0.198
328	Amyotrophic lateral sclerosis	Monocyte chemoattractant protein-3 levels	90274823	|| id:ebi-a-GCST90027164	Inverse variance weighted	14	-0.0299347	0.0472793	0.526637	0.970509	0.884616	1.06474	15.6337	12	0.208597	0.0132781	0.254217	0.198
329	Amyotrophic lateral sclerosis	Monocyte chemoattractant protein-3 levels	90274823	|| id:ebi-a-GCST90027164	Simple mode	14	-0.0579252	0.103804	0.58631	0.94372	0.769987	1.15665	15.6337	12	0.208597	0.0132781	0.254217	0.198
330	Amyotrophic lateral sclerosis	Monocyte chemoattractant protein-3 levels	90274823	|| id:ebi-a-GCST90027164	Weighted mode	14	-0.0737877	0.0749086	0.342585	0.928869	0.802031	1.07577	15.6337	12	0.208597	0.0132781	0.254217	0.198
331	Amyotrophic lateral sclerosis	Monocyte chemoattractant protein-4 levels	90274824	|| id:ebi-a-GCST90027164	MR Egger	14	-0.0442404	0.0757348	0.569939	0.956724	0.824745	1.10982	7.57057	12	0.817725	0.00769015	0.39172	0.84
332	Amyotrophic lateral sclerosis	Monocyte chemoattractant protein-4 levels	90274824	|| id:ebi-a-GCST90027164	Weighted median	14	0.010832	0.0475389	0.819759	1.01089	0.920955	1.10961	7.57057	12	0.817725	0.00769015	0.39172	0.84
333	Amyotrophic lateral sclerosis	Monocyte chemoattractant protein-4 levels	90274824	|| id:ebi-a-GCST90027164	Inverse variance weighted	14	0.0148371	0.0362622	0.682421	1.01495	0.945315	1.08971	7.57057	12	0.817725	0.00769015	0.39172	0.84
334	Amyotrophic lateral sclerosis	Monocyte chemoattractant protein-4 levels	90274824	|| id:ebi-a-GCST90027164	Simple mode	14	0.0195693	0.0685143	0.779667	1.01976	0.891617	1.16632	7.57057	12	0.817725	0.00769015	0.39172	0.84
335	Amyotrophic lateral sclerosis	Monocyte chemoattractant protein-4 levels	90274824	|| id:ebi-a-GCST90027164	Weighted mode	14	0.0132711	0.0578652	0.82217	1.01336	0.904706	1.13506	7.57057	12	0.817725	0.00769015	0.39172	0.84
336	Amyotrophic lateral sclerosis	Macrophage inflammatory protein 1a levels	90274825	|| id:ebi-a-GCST90027164	MR Egger	14	0.0225537	0.0755356	0.770365	1.02281	0.882059	1.18602	10.7202	12	0.553041	-0.00254697	0.773071	0.59
337	Amyotrophic lateral sclerosis	Macrophage inflammatory protein 1a levels	90274825	|| id:ebi-a-GCST90027164	Weighted median	14	-0.00487053	0.0509894	0.923901	0.995141	0.900496	1.09973	10.7202	12	0.553041	-0.00254697	0.773071	0.59
338	Amyotrophic lateral sclerosis	Macrophage inflammatory protein 1a levels	90274825	|| id:ebi-a-GCST90027164	Inverse variance weighted	14	0.00300001	0.0362034	0.933959	1.003	0.934299	1.07676	10.7202	12	0.553041	-0.00254697	0.773071	0.59
339	Amyotrophic lateral sclerosis	Macrophage inflammatory protein 1a levels	90274825	|| id:ebi-a-GCST90027164	Simple mode	14	-0.0108197	0.0960039	0.91199	0.989239	0.81956	1.19405	10.7202	12	0.553041	-0.00254697	0.773071	0.59
340	Amyotrophic lateral sclerosis	Macrophage inflammatory protein 1a levels	90274825	|| id:ebi-a-GCST90027164	Weighted mode	14	-0.0601993	0.0778571	0.453233	0.941577	0.808318	1.0968	10.7202	12	0.553041	-0.00254697	0.773071	0.59
341	Amyotrophic lateral sclerosis	Matrix metalloproteinase-1 levels	90274826	|| id:ebi-a-GCST90027164	MR Egger	14	-0.154582	0.0852114	0.0947272	0.856773	0.724991	1.01251	14.8268	12	0.251043	0.0137874	0.181852	0.168
342	Amyotrophic lateral sclerosis	Matrix metalloproteinase-1 levels	90274826	|| id:ebi-a-GCST90027164	Weighted median	14	7.64242e-05	0.0530384	0.99885	1.00008	0.901335	1.10964	14.8268	12	0.251043	0.0137874	0.181852	0.168
343	Amyotrophic lateral sclerosis	Matrix metalloproteinase-1 levels	90274826	|| id:ebi-a-GCST90027164	Inverse variance weighted	14	-0.0485865	0.0423876	0.251695	0.952575	0.876633	1.0351	14.8268	12	0.251043	0.0137874	0.181852	0.168
344	Amyotrophic lateral sclerosis	Matrix metalloproteinase-1 levels	90274826	|| id:ebi-a-GCST90027164	Simple mode	14	-0.0275799	0.100108	0.787261	0.972797	0.799482	1.18368	14.8268	12	0.251043	0.0137874	0.181852	0.168
345	Amyotrophic lateral sclerosis	Matrix metalloproteinase-1 levels	90274826	|| id:ebi-a-GCST90027164	Weighted mode	14	-0.0987841	0.0863592	0.273302	0.905938	0.764871	1.07302	14.8268	12	0.251043	0.0137874	0.181852	0.168
346	Amyotrophic lateral sclerosis	Matrix metalloproteinase-10 levels	90274827	|| id:ebi-a-GCST90027164	MR Egger	14	-0.0766735	0.105862	0.482777	0.926192	0.752644	1.13976	23.3321	12	0.0250351	0.0133805	0.290055	0.019
347	Amyotrophic lateral sclerosis	Matrix metalloproteinase-10 levels	90274827	|| id:ebi-a-GCST90027164	Weighted median	14	0.00435069	0.0505823	0.931457	1.00436	0.909563	1.10904	23.3321	12	0.0250351	0.0133805	0.290055	0.019
348	Amyotrophic lateral sclerosis	Matrix metalloproteinase-10 levels	90274827	|| id:ebi-a-GCST90027164	Inverse variance weighted	14	0.0261368	0.0512211	0.60986	1.02648	0.928433	1.13488	23.3321	12	0.0250351	0.0133805	0.290055	0.019
349	Amyotrophic lateral sclerosis	Matrix metalloproteinase-10 levels	90274827	|| id:ebi-a-GCST90027164	Simple mode	14	0.109965	0.0816883	0.20126	1.11624	0.951092	1.31006	23.3321	12	0.0250351	0.0133805	0.290055	0.019
350	Amyotrophic lateral sclerosis	Matrix metalloproteinase-10 levels	90274827	|| id:ebi-a-GCST90027164	Weighted mode	14	0.00644494	0.0652201	0.92279	1.00647	0.885692	1.14371	23.3321	12	0.0250351	0.0133805	0.290055	0.019
351	Amyotrophic lateral sclerosis	Neurturin levels	90274828	|| id:ebi-a-GCST90027164	MR Egger	14	0.0522339	0.096212	0.597136	1.05362	0.872544	1.27228	15.7922	12	0.20094	-0.00232416	0.836506	0.242
352	Amyotrophic lateral sclerosis	Neurturin levels	90274828	|| id:ebi-a-GCST90027164	Weighted median	14	0.0259351	0.0568	0.647956	1.02627	0.918151	1.14713	15.7922	12	0.20094	-0.00232416	0.836506	0.242
353	Amyotrophic lateral sclerosis	Neurturin levels	90274828	|| id:ebi-a-GCST90027164	Inverse variance weighted	14	0.0344188	0.0443303	0.437503	1.03502	0.948884	1.12897	15.7922	12	0.20094	-0.00232416	0.836506	0.242
354	Amyotrophic lateral sclerosis	Neurturin levels	90274828	|| id:ebi-a-GCST90027164	Simple mode	14	-0.0137962	0.109846	0.901973	0.986298	0.795253	1.22324	15.7922	12	0.20094	-0.00232416	0.836506	0.242
355	Amyotrophic lateral sclerosis	Neurturin levels	90274828	|| id:ebi-a-GCST90027164	Weighted mode	14	0.0736218	0.0871093	0.413304	1.0764	0.907454	1.2768	15.7922	12	0.20094	-0.00232416	0.836506	0.242
356	Amyotrophic lateral sclerosis	Neurotrophin-3 levels	90274829	|| id:ebi-a-GCST90027164	MR Egger	14	0.0401223	0.0753401	0.604068	1.04094	0.898037	1.20658	6.39164	12	0.895068	0.00292509	0.739568	0.92
357	Amyotrophic lateral sclerosis	Neurotrophin-3 levels	90274829	|| id:ebi-a-GCST90027164	Weighted median	14	0.0430458	0.0498198	0.387571	1.04399	0.946863	1.15107	6.39164	12	0.895068	0.00292509	0.739568	0.92
358	Amyotrophic lateral sclerosis	Neurotrophin-3 levels	90274829	|| id:ebi-a-GCST90027164	Inverse variance weighted	14	0.0626469	0.0359584	0.0814723	1.06465	0.992199	1.14239	6.39164	12	0.895068	0.00292509	0.739568	0.92
359	Amyotrophic lateral sclerosis	Neurotrophin-3 levels	90274829	|| id:ebi-a-GCST90027164	Simple mode	14	0.0312353	0.0799254	0.70227	1.03173	0.882128	1.2067	6.39164	12	0.895068	0.00292509	0.739568	0.92
360	Amyotrophic lateral sclerosis	Neurotrophin-3 levels	90274829	|| id:ebi-a-GCST90027164	Weighted mode	14	0.0347128	0.0740744	0.647101	1.03532	0.895411	1.1971	6.39164	12	0.895068	0.00292509	0.739568	0.92
361	Amyotrophic lateral sclerosis	Osteoprotegerin levels	90274830	|| id:ebi-a-GCST90027164	MR Egger	14	0.0605533	0.07786	0.451796	1.06242	0.912057	1.23758	13.9575	12	0.303431	-0.0034241	0.707314	0.297
362	Amyotrophic lateral sclerosis	Osteoprotegerin levels	90274830	|| id:ebi-a-GCST90027164	Weighted median	14	0.0892514	0.0514079	0.0825388	1.09336	0.988558	1.20926	13.9575	12	0.303431	-0.0034241	0.707314	0.297
363	Amyotrophic lateral sclerosis	Osteoprotegerin levels	90274830	|| id:ebi-a-GCST90027164	Inverse variance weighted	14	0.0342741	0.0360618	0.341896	1.03487	0.964248	1.11066	13.9575	12	0.303431	-0.0034241	0.707314	0.297
364	Amyotrophic lateral sclerosis	Osteoprotegerin levels	90274830	|| id:ebi-a-GCST90027164	Simple mode	14	0.132273	0.0964377	0.193399	1.14142	0.944835	1.37891	13.9575	12	0.303431	-0.0034241	0.707314	0.297
365	Amyotrophic lateral sclerosis	Osteoprotegerin levels	90274830	|| id:ebi-a-GCST90027164	Weighted mode	14	0.114341	0.0884058	0.218395	1.12113	0.942769	1.33325	13.9575	12	0.303431	-0.0034241	0.707314	0.297
366	Amyotrophic lateral sclerosis	Oncostatin-M levels	90274831	|| id:ebi-a-GCST90027164	MR Egger	14	-0.0397413	0.0762036	0.611499	0.961038	0.827703	1.11585	9.64014	12	0.647497	0.00125372	0.887969	0.723
367	Amyotrophic lateral sclerosis	Oncostatin-M levels	90274831	|| id:ebi-a-GCST90027164	Weighted median	14	-0.0525336	0.0496738	0.290251	0.948822	0.860799	1.04585	9.64014	12	0.647497	0.00125372	0.887969	0.723
368	Amyotrophic lateral sclerosis	Oncostatin-M levels	90274831	|| id:ebi-a-GCST90027164	Inverse variance weighted	14	-0.0301178	0.0365292	0.409665	0.970331	0.903287	1.04235	9.64014	12	0.647497	0.00125372	0.887969	0.723
369	Amyotrophic lateral sclerosis	Oncostatin-M levels	90274831	|| id:ebi-a-GCST90027164	Simple mode	14	-0.0297224	0.0780238	0.709401	0.970715	0.83306	1.13112	9.64014	12	0.647497	0.00125372	0.887969	0.723
370	Amyotrophic lateral sclerosis	Oncostatin-M levels	90274831	|| id:ebi-a-GCST90027164	Weighted mode	14	-0.0535229	0.0670399	0.438995	0.947884	0.83117	1.08099	9.64014	12	0.647497	0.00125372	0.887969	0.723
371	Amyotrophic lateral sclerosis	Programmed cell death 1 ligand 1 levels	90274832	|| id:ebi-a-GCST90027164	MR Egger	14	0.0543033	0.100965	0.60052	1.0558	0.866244	1.28685	21.8209	12	0.0395769	-0.00550138	0.641685	0.056
372	Amyotrophic lateral sclerosis	Programmed cell death 1 ligand 1 levels	90274832	|| id:ebi-a-GCST90027164	Weighted median	14	0.0469173	0.0574888	0.414436	1.04804	0.936355	1.17304	21.8209	12	0.0395769	-0.00550138	0.641685	0.056
373	Amyotrophic lateral sclerosis	Programmed cell death 1 ligand 1 levels	90274832	|| id:ebi-a-GCST90027164	Inverse variance weighted	14	0.0119662	0.0467941	0.798167	1.01204	0.923347	1.10925	21.8209	12	0.0395769	-0.00550138	0.641685	0.056
374	Amyotrophic lateral sclerosis	Programmed cell death 1 ligand 1 levels	90274832	|| id:ebi-a-GCST90027164	Simple mode	14	0.132167	0.127839	0.320056	1.1413	0.888342	1.46628	21.8209	12	0.0395769	-0.00550138	0.641685	0.056
375	Amyotrophic lateral sclerosis	Programmed cell death 1 ligand 1 levels	90274832	|| id:ebi-a-GCST90027164	Weighted mode	14	-0.149546	0.106269	0.182815	0.861099	0.69919	1.0605	21.8209	12	0.0395769	-0.00550138	0.641685	0.056
376	Amyotrophic lateral sclerosis	Stem cell factor levels	90274833	|| id:ebi-a-GCST90027164	MR Egger	14	-0.156525	0.0966091	0.131156	0.85511	0.707598	1.03337	19.6519	12	0.0739651	0.0302646	0.0178086	0.004
377	Amyotrophic lateral sclerosis	Stem cell factor levels	90274833	|| id:ebi-a-GCST90027164	Weighted median	14	0.0447376	0.0597308	0.453864	1.04575	0.93022	1.17564	19.6519	12	0.0739651	0.0302646	0.0178086	0.004
378	Amyotrophic lateral sclerosis	Stem cell factor levels	90274833	|| id:ebi-a-GCST90027164	Inverse variance weighted	14	0.0761302	0.0567369	0.179657	1.0791	0.965534	1.20603	19.6519	12	0.0739651	0.0302646	0.0178086	0.004
379	Amyotrophic lateral sclerosis	Stem cell factor levels	90274833	|| id:ebi-a-GCST90027164	Simple mode	14	-0.0131763	0.115873	0.911203	0.98691	0.786402	1.23854	19.6519	12	0.0739651	0.0302646	0.0178086	0.004
380	Amyotrophic lateral sclerosis	Stem cell factor levels	90274833	|| id:ebi-a-GCST90027164	Weighted mode	14	-0.0483294	0.0837479	0.573742	0.95282	0.80858	1.12279	19.6519	12	0.0739651	0.0302646	0.0178086	0.004
381	Amyotrophic lateral sclerosis	SIR2-like protein 2 levels	90274834	|| id:ebi-a-GCST90027164	MR Egger	14	-0.0788666	0.0855421	0.374713	0.924163	0.781509	1.09286	15.2213	12	0.229557	0.00794153	0.432311	0.248
382	Amyotrophic lateral sclerosis	SIR2-like protein 2 levels	90274834	|| id:ebi-a-GCST90027164	Weighted median	14	-0.0240131	0.0521163	0.644971	0.976273	0.881473	1.08127	15.2213	12	0.229557	0.00794153	0.432311	0.248
383	Amyotrophic lateral sclerosis	SIR2-like protein 2 levels	90274834	|| id:ebi-a-GCST90027164	Inverse variance weighted	14	-0.0178453	0.0404176	0.658834	0.982313	0.907498	1.0633	15.2213	12	0.229557	0.00794153	0.432311	0.248
384	Amyotrophic lateral sclerosis	SIR2-like protein 2 levels	90274834	|| id:ebi-a-GCST90027164	Simple mode	14	-0.15124	0.102286	0.163067	0.859641	0.703476	1.05047	15.2213	12	0.229557	0.00794153	0.432311	0.248
385	Amyotrophic lateral sclerosis	SIR2-like protein 2 levels	90274834	|| id:ebi-a-GCST90027164	Weighted mode	14	-0.0689801	0.0831116	0.421536	0.933345	0.793042	1.09847	15.2213	12	0.229557	0.00794153	0.432311	0.248
386	Amyotrophic lateral sclerosis	Signaling lymphocytic activation molecule levels	90274835	|| id:ebi-a-GCST90027164	MR Egger	14	-0.0530067	0.119515	0.665283	0.948374	0.75032	1.1987	29.7569	12	0.00303753	0.00673858	0.630501	0.007
387	Amyotrophic lateral sclerosis	Signaling lymphocytic activation molecule levels	90274835	|| id:ebi-a-GCST90027164	Weighted median	14	-0.0280516	0.0537711	0.60189	0.972338	0.875077	1.08041	29.7569	12	0.00303753	0.00673858	0.630501	0.007
388	Amyotrophic lateral sclerosis	Signaling lymphocytic activation molecule levels	90274835	|| id:ebi-a-GCST90027164	Inverse variance weighted	14	-0.00120673	0.0554998	0.982653	0.998794	0.895846	1.11357	29.7569	12	0.00303753	0.00673858	0.630501	0.007
389	Amyotrophic lateral sclerosis	Signaling lymphocytic activation molecule levels	90274835	|| id:ebi-a-GCST90027164	Simple mode	14	-0.024607	0.0913291	0.791826	0.975693	0.815779	1.16696	29.7569	12	0.00303753	0.00673858	0.630501	0.007
390	Amyotrophic lateral sclerosis	Signaling lymphocytic activation molecule levels	90274835	|| id:ebi-a-GCST90027164	Weighted mode	14	-0.0524311	0.0625258	0.416874	0.94892	0.839472	1.07264	29.7569	12	0.00303753	0.00673858	0.630501	0.007
391	Amyotrophic lateral sclerosis	Sulfotransferase 1A1 levels	90274836	|| id:ebi-a-GCST90027164	MR Egger	14	-0.182458	0.0858998	0.0551331	0.83322	0.704109	0.986004	6.68293	12	0.877836	0.0154557	0.142783	0.77
392	Amyotrophic lateral sclerosis	Sulfotransferase 1A1 levels	90274836	|| id:ebi-a-GCST90027164	Weighted median	14	-0.0755444	0.0556597	0.1747	0.927239	0.831406	1.03412	6.68293	12	0.877836	0.0154557	0.142783	0.77
393	Amyotrophic lateral sclerosis	Sulfotransferase 1A1 levels	90274836	|| id:ebi-a-GCST90027164	Inverse variance weighted	14	-0.0643654	0.0413392	0.119469	0.937662	0.864685	1.0168	6.68293	12	0.877836	0.0154557	0.142783	0.77
394	Amyotrophic lateral sclerosis	Sulfotransferase 1A1 levels	90274836	|| id:ebi-a-GCST90027164	Simple mode	14	0.00549403	0.0885141	0.951452	1.00551	0.845359	1.196	6.68293	12	0.877836	0.0154557	0.142783	0.77
395	Amyotrophic lateral sclerosis	Sulfotransferase 1A1 levels	90274836	|| id:ebi-a-GCST90027164	Weighted mode	14	-0.0480917	0.0703899	0.506464	0.953046	0.830227	1.09403	6.68293	12	0.877836	0.0154557	0.142783	0.77
396	Amyotrophic lateral sclerosis	STAM binding protein levels	90274837	|| id:ebi-a-GCST90027164	MR Egger	14	-0.0380858	0.0839054	0.657991	0.96263	0.816653	1.1347	14.888	12	0.247619	0.00423415	0.666498	0.329
397	Amyotrophic lateral sclerosis	STAM binding protein levels	90274837	|| id:ebi-a-GCST90027164	Weighted median	14	0.044946	0.0506284	0.374669	1.04597	0.947161	1.15509	14.888	12	0.247619	0.00423415	0.666498	0.329
398	Amyotrophic lateral sclerosis	STAM binding protein levels	90274837	|| id:ebi-a-GCST90027164	Inverse variance weighted	14	-0.00553609	0.0388849	0.886787	0.994479	0.921502	1.07324	14.888	12	0.247619	0.00423415	0.666498	0.329
399	Amyotrophic lateral sclerosis	STAM binding protein levels	90274837	|| id:ebi-a-GCST90027164	Simple mode	14	0.0407271	0.101456	0.694628	1.04157	0.853741	1.27072	14.888	12	0.247619	0.00423415	0.666498	0.329
400	Amyotrophic lateral sclerosis	STAM binding protein levels	90274837	|| id:ebi-a-GCST90027164	Weighted mode	14	0.0539108	0.070134	0.45582	1.05539	0.919843	1.21091	14.888	12	0.247619	0.00423415	0.666498	0.329
401	Amyotrophic lateral sclerosis	Transforming growth factor-alpha levels	90274838	|| id:ebi-a-GCST90027164	MR Egger	14	-0.0613332	0.0756953	0.433564	0.94051	0.810831	1.09093	2.34892	12	0.998653	0.00456932	0.606995	1
402	Amyotrophic lateral sclerosis	Transforming growth factor-alpha levels	90274838	|| id:ebi-a-GCST90027164	Weighted median	14	-0.0323047	0.0441292	0.46414	0.968212	0.887987	1.05568	2.34892	12	0.998653	0.00456932	0.606995	1
403	Amyotrophic lateral sclerosis	Transforming growth factor-alpha levels	90274838	|| id:ebi-a-GCST90027164	Inverse variance weighted	14	-0.0262346	0.0362513	0.469258	0.974107	0.907295	1.04584	2.34892	12	0.998653	0.00456932	0.606995	1
404	Amyotrophic lateral sclerosis	Transforming growth factor-alpha levels	90274838	|| id:ebi-a-GCST90027164	Simple mode	14	-0.0456221	0.072271	0.538809	0.955403	0.829217	1.10079	2.34892	12	0.998653	0.00456932	0.606995	1
405	Amyotrophic lateral sclerosis	Transforming growth factor-alpha levels	90274838	|| id:ebi-a-GCST90027164	Weighted mode	14	-0.0381548	0.063786	0.560005	0.962564	0.849442	1.09075	2.34892	12	0.998653	0.00456932	0.606995	1
406	Amyotrophic lateral sclerosis	Tumor necrosis factor levels	90274839	|| id:ebi-a-GCST90027164	MR Egger	14	-0.00512187	0.0844213	0.952621	0.994891	0.843169	1.17391	12.0091	12	0.444947	-0.00453142	0.648169	0.505
407	Amyotrophic lateral sclerosis	Tumor necrosis factor levels	90274839	|| id:ebi-a-GCST90027164	Weighted median	14	-0.0464236	0.0599008	0.438335	0.954637	0.848887	1.07356	12.0091	12	0.444947	-0.00453142	0.648169	0.505
408	Amyotrophic lateral sclerosis	Tumor necrosis factor levels	90274839	|| id:ebi-a-GCST90027164	Inverse variance weighted	14	-0.0397969	0.0404491	0.325177	0.960985	0.887739	1.04027	12.0091	12	0.444947	-0.00453142	0.648169	0.505
409	Amyotrophic lateral sclerosis	Tumor necrosis factor levels	90274839	|| id:ebi-a-GCST90027164	Simple mode	14	-0.00918904	0.105376	0.93184	0.990853	0.805956	1.21817	12.0091	12	0.444947	-0.00453142	0.648169	0.505
410	Amyotrophic lateral sclerosis	Tumor necrosis factor levels	90274839	|| id:ebi-a-GCST90027164	Weighted mode	14	-0.0310509	0.0816752	0.709954	0.969426	0.826022	1.13773	12.0091	12	0.444947	-0.00453142	0.648169	0.505
411	Amyotrophic lateral sclerosis	TNF-beta levels	90274840	|| id:ebi-a-GCST90027164	MR Egger	14	0.151976	0.209349	0.48179	1.16413	0.772327	1.7547	72.634	12	1.02651e-10	-0.0288772	0.251768	<0.001
412	Amyotrophic lateral sclerosis	TNF-beta levels	90274840	|| id:ebi-a-GCST90027164	Weighted median	14	-0.0271848	0.0597521	0.649138	0.973181	0.865629	1.0941	72.634	12	1.02651e-10	-0.0288772	0.251768	<0.001
413	Amyotrophic lateral sclerosis	TNF-beta levels	90274840	|| id:ebi-a-GCST90027164	Inverse variance weighted	14	-0.0691498	0.102228	0.498771	0.933187	0.763748	1.14022	72.634	12	1.02651e-10	-0.0288772	0.251768	<0.001
414	Amyotrophic lateral sclerosis	TNF-beta levels	90274840	|| id:ebi-a-GCST90027164	Simple mode	14	-0.0341972	0.0902613	0.710901	0.966381	0.809685	1.1534	72.634	12	1.02651e-10	-0.0288772	0.251768	<0.001
415	Amyotrophic lateral sclerosis	TNF-beta levels	90274840	|| id:ebi-a-GCST90027164	Weighted mode	14	-0.056739	0.068363	0.421538	0.944841	0.826355	1.08031	72.634	12	1.02651e-10	-0.0288772	0.251768	<0.001
416	Amyotrophic lateral sclerosis	Tumor necrosis factor receptor superfamily member 9 levels	90274841	|| id:ebi-a-GCST90027164	MR Egger	14	0.0859379	0.0952483	0.384676	1.08974	0.90416	1.31341	15.2417	12	0.228485	-0.00823286	0.465271	0.258
417	Amyotrophic lateral sclerosis	Tumor necrosis factor receptor superfamily member 9 levels	90274841	|| id:ebi-a-GCST90027164	Weighted median	14	0.0405213	0.0600671	0.49993	1.04135	0.925695	1.17146	15.2417	12	0.228485	-0.00823286	0.465271	0.258
418	Amyotrophic lateral sclerosis	Tumor necrosis factor receptor superfamily member 9 levels	90274841	|| id:ebi-a-GCST90027164	Inverse variance weighted	14	0.022924	0.0449688	0.610209	1.02319	0.936866	1.11747	15.2417	12	0.228485	-0.00823286	0.465271	0.258
419	Amyotrophic lateral sclerosis	Tumor necrosis factor receptor superfamily member 9 levels	90274841	|| id:ebi-a-GCST90027164	Simple mode	14	0.0762363	0.0938192	0.431084	1.07922	0.897943	1.29709	15.2417	12	0.228485	-0.00823286	0.465271	0.258
420	Amyotrophic lateral sclerosis	Tumor necrosis factor receptor superfamily member 9 levels	90274841	|| id:ebi-a-GCST90027164	Weighted mode	14	0.0635795	0.0845576	0.465503	1.06564	0.902891	1.25773	15.2417	12	0.228485	-0.00823286	0.465271	0.258
421	Amyotrophic lateral sclerosis	Tumor necrosis factor ligand superfamily member 14 levels	90274842	|| id:ebi-a-GCST90027164	MR Egger	14	-0.0443795	0.0851007	0.611512	0.956591	0.809631	1.13023	8.83812	12	0.716691	0.00575786	0.566504	0.801
422	Amyotrophic lateral sclerosis	Tumor necrosis factor ligand superfamily member 14 levels	90274842	|| id:ebi-a-GCST90027164	Weighted median	14	-0.0110318	0.0569968	0.846528	0.989029	0.884489	1.10592	8.83812	12	0.716691	0.00575786	0.566504	0.801
423	Amyotrophic lateral sclerosis	Tumor necrosis factor ligand superfamily member 14 levels	90274842	|| id:ebi-a-GCST90027164	Inverse variance weighted	14	-0.000383887	0.0408762	0.992507	0.999616	0.922654	1.083	8.83812	12	0.716691	0.00575786	0.566504	0.801
424	Amyotrophic lateral sclerosis	Tumor necrosis factor ligand superfamily member 14 levels	90274842	|| id:ebi-a-GCST90027164	Simple mode	14	-0.0187969	0.0865047	0.831353	0.981379	0.828328	1.16271	8.83812	12	0.716691	0.00575786	0.566504	0.801
425	Amyotrophic lateral sclerosis	Tumor necrosis factor ligand superfamily member 14 levels	90274842	|| id:ebi-a-GCST90027164	Weighted mode	14	-0.00807356	0.0727287	0.913305	0.991959	0.860173	1.14394	8.83812	12	0.716691	0.00575786	0.566504	0.801
426	Amyotrophic lateral sclerosis	TNF-related apoptosis-inducing ligand levels	90274843	|| id:ebi-a-GCST90027164	MR Egger	14	0.010001	0.104485	0.925325	1.01005	0.823008	1.2396	22.9455	12	0.0281924	-0.00432815	0.723039	0.033
427	Amyotrophic lateral sclerosis	TNF-related apoptosis-inducing ligand levels	90274843	|| id:ebi-a-GCST90027164	Weighted median	14	-0.00307092	0.0557184	0.956047	0.996934	0.893795	1.11197	22.9455	12	0.0281924	-0.00432815	0.723039	0.033
428	Amyotrophic lateral sclerosis	TNF-related apoptosis-inducing ligand levels	90274843	|| id:ebi-a-GCST90027164	Inverse variance weighted	14	-0.0233045	0.0482167	0.628863	0.976965	0.888866	1.0738	22.9455	12	0.0281924	-0.00432815	0.723039	0.033
429	Amyotrophic lateral sclerosis	TNF-related apoptosis-inducing ligand levels	90274843	|| id:ebi-a-GCST90027164	Simple mode	14	0.0814343	0.105084	0.452237	1.08484	0.882912	1.33296	22.9455	12	0.0281924	-0.00432815	0.723039	0.033
430	Amyotrophic lateral sclerosis	TNF-related apoptosis-inducing ligand levels	90274843	|| id:ebi-a-GCST90027164	Weighted mode	14	0.0492046	0.111714	0.666845	1.05044	0.843872	1.30756	22.9455	12	0.0281924	-0.00432815	0.723039	0.033
431	Amyotrophic lateral sclerosis	TNF-related activation-induced cytokine levels	90274844	|| id:ebi-a-GCST90027164	MR Egger	14	0.00963924	0.0980885	0.92334	1.00969	0.833089	1.22372	20.0363	12	0.0664033	-0.00309854	0.786803	0.065
432	Amyotrophic lateral sclerosis	TNF-related activation-induced cytokine levels	90274844	|| id:ebi-a-GCST90027164	Weighted median	14	-0.110605	0.0539973	0.0405262	0.895292	0.805381	0.995241	20.0363	12	0.0664033	-0.00309854	0.786803	0.065
433	Amyotrophic lateral sclerosis	TNF-related activation-induced cytokine levels	90274844	|| id:ebi-a-GCST90027164	Inverse variance weighted	14	-0.0141839	0.0452342	0.753851	0.985916	0.902269	1.07732	20.0363	12	0.0664033	-0.00309854	0.786803	0.065
434	Amyotrophic lateral sclerosis	TNF-related activation-induced cytokine levels	90274844	|| id:ebi-a-GCST90027164	Simple mode	14	-0.130324	0.0927102	0.183258	0.877811	0.731955	1.05273	20.0363	12	0.0664033	-0.00309854	0.786803	0.065
435	Amyotrophic lateral sclerosis	TNF-related activation-induced cytokine levels	90274844	|| id:ebi-a-GCST90027164	Weighted mode	14	-0.130324	0.0788168	0.12216	0.877811	0.752161	1.02445	20.0363	12	0.0664033	-0.00309854	0.786803	0.065
436	Amyotrophic lateral sclerosis	Thymic stromal lymphopoietin levels	90274845	|| id:ebi-a-GCST90027164	MR Egger	14	0.0445928	0.085265	0.610502	1.0456	0.884682	1.23579	10.0043	12	0.615583	-0.000106356	0.991505	0.702
437	Amyotrophic lateral sclerosis	Thymic stromal lymphopoietin levels	90274845	|| id:ebi-a-GCST90027164	Weighted median	14	0.0731854	0.0586269	0.211912	1.07593	0.959135	1.20695	10.0043	12	0.615583	-0.000106356	0.991505	0.702
438	Amyotrophic lateral sclerosis	Thymic stromal lymphopoietin levels	90274845	|| id:ebi-a-GCST90027164	Inverse variance weighted	14	0.0437797	0.0409474	0.284993	1.04475	0.96418	1.13206	10.0043	12	0.615583	-0.000106356	0.991505	0.702
439	Amyotrophic lateral sclerosis	Thymic stromal lymphopoietin levels	90274845	|| id:ebi-a-GCST90027164	Simple mode	14	0.127	0.0922107	0.191678	1.13542	0.947685	1.36034	10.0043	12	0.615583	-0.000106356	0.991505	0.702
440	Amyotrophic lateral sclerosis	Thymic stromal lymphopoietin levels	90274845	|| id:ebi-a-GCST90027164	Weighted mode	14	0.10468	0.0739324	0.180318	1.11036	0.960571	1.2835	10.0043	12	0.615583	-0.000106356	0.991505	0.702
441	Amyotrophic lateral sclerosis	Tumor necrosis factor ligand superfamily member 12 levels	90274846	|| id:ebi-a-GCST90027164	MR Egger	14	-0.015512	0.0752088	0.840052	0.984608	0.849658	1.14099	7.78698	12	0.801547	0.0140855	0.127064	0.586
442	Amyotrophic lateral sclerosis	Tumor necrosis factor ligand superfamily member 12 levels	90274846	|| id:ebi-a-GCST90027164	Weighted median	14	0.0849339	0.055217	0.124004	1.08865	0.976978	1.21308	7.78698	12	0.801547	0.0140855	0.127064	0.586
443	Amyotrophic lateral sclerosis	Tumor necrosis factor ligand superfamily member 12 levels	90274846	|| id:ebi-a-GCST90027164	Inverse variance weighted	14	0.0928368	0.0358941	0.00969816	1.09728	1.02274	1.17726	7.78698	12	0.801547	0.0140855	0.127064	0.586
444	Amyotrophic lateral sclerosis	Tumor necrosis factor ligand superfamily member 12 levels	90274846	|| id:ebi-a-GCST90027164	Simple mode	14	0.143704	0.101825	0.181645	1.15454	0.945658	1.40957	7.78698	12	0.801547	0.0140855	0.127064	0.586
445	Amyotrophic lateral sclerosis	Tumor necrosis factor ligand superfamily member 12 levels	90274846	|| id:ebi-a-GCST90027164	Weighted mode	14	-0.015734	0.0887636	0.862038	0.984389	0.827198	1.17145	7.78698	12	0.801547	0.0140855	0.127064	0.586
446	Amyotrophic lateral sclerosis	Urokinase-type plasminogen activator levels	90274847	|| id:ebi-a-GCST90027164	MR Egger	14	-0.0786666	0.117824	0.516984	0.924348	0.733739	1.16447	29.4768	12	0.00334548	0.0158776	0.260702	0.001
447	Amyotrophic lateral sclerosis	Urokinase-type plasminogen activator levels	90274847	|| id:ebi-a-GCST90027164	Weighted median	14	0.108186	0.0600217	0.0714764	1.11425	0.990587	1.25336	29.4768	12	0.00334548	0.0158776	0.260702	0.001
448	Amyotrophic lateral sclerosis	Urokinase-type plasminogen activator levels	90274847	|| id:ebi-a-GCST90027164	Inverse variance weighted	14	0.0435617	0.0570643	0.445237	1.04452	0.933995	1.16813	29.4768	12	0.00334548	0.0158776	0.260702	0.001
449	Amyotrophic lateral sclerosis	Urokinase-type plasminogen activator levels	90274847	|| id:ebi-a-GCST90027164	Simple mode	14	0.117264	0.0933583	0.231198	1.12442	0.936395	1.35019	29.4768	12	0.00334548	0.0158776	0.260702	0.001
450	Amyotrophic lateral sclerosis	Urokinase-type plasminogen activator levels	90274847	|| id:ebi-a-GCST90027164	Weighted mode	14	0.119665	0.110809	0.299805	1.12712	0.907084	1.40053	29.4768	12	0.00334548	0.0158776	0.260702	0.001
451	Amyotrophic lateral sclerosis	Vascular endothelial growth factor A levels	90274848	|| id:ebi-a-GCST90027164	MR Egger	14	0.0356536	0.0753662	0.644651	1.0363	0.893987	1.20126	10.025	12	0.613765	-0.00085646	0.922408	0.713
452	Amyotrophic lateral sclerosis	Vascular endothelial growth factor A levels	90274848	|| id:ebi-a-GCST90027164	Weighted median	14	0.0268601	0.0471549	0.56894	1.02722	0.93654	1.12669	10.025	12	0.613765	-0.00085646	0.922408	0.713
453	Amyotrophic lateral sclerosis	Vascular endothelial growth factor A levels	90274848	|| id:ebi-a-GCST90027164	Inverse variance weighted	14	0.029076	0.0361572	0.421307	1.0295	0.959069	1.10511	10.025	12	0.613765	-0.00085646	0.922408	0.713
454	Amyotrophic lateral sclerosis	Vascular endothelial growth factor A levels	90274848	|| id:ebi-a-GCST90027164	Simple mode	14	0.0372271	0.0698222	0.602912	1.03793	0.905177	1.19015	10.025	12	0.613765	-0.00085646	0.922408	0.713
455	Amyotrophic lateral sclerosis	Vascular endothelial growth factor A levels	90274848	|| id:ebi-a-GCST90027164	Weighted mode	14	0.0259377	0.0616335	0.680747	1.02628	0.909497	1.15805	10.025	12	0.613765	-0.00085646	0.922408	0.713
